1 **The Japanese wolf is most closely related to modern dogs and its ancestral genome**  
2 **has been widely inherited by dogs throughout East Eurasia**

3

4 Jun Gojobori<sup>1†</sup>, Nami Arakawa<sup>1</sup>, Xiaokaiti Xiayire<sup>1</sup>, Yuki Matsumoto<sup>2</sup>, Shuichi Matsumura<sup>3</sup>,  
5 Hitomi Hongo<sup>1</sup>, Naotaka Ishiguro<sup>\*1,3</sup>, Yohey Terai<sup>\*1†</sup>

6

7 **Institutions**

8 <sup>1</sup>*SOKENDAI (The Graduate University for Advanced Studies), Department of Evolutionary*  
9 *Studies of Biosystems, Shonan Village, Hayama, Kanagawa 240-0193, Japan.*

10 <sup>2</sup>*Research and Development Section, Anicom Specialty Medical Institute*  
11 *Inc., Chojamachi Yokohamashi-Nakaku, Kanagawaken 231-0033, Japan*

12 <sup>3</sup>*Faculty of Applied Biological Sciences, Gifu University, Yanagido 1-1, Gifu 501-1193, Japan.*

13

14 \*Corresponding author: Y. Terai, SOKENDAI (The Graduate University for Advanced Studies),  
15 Department of Evolutionary Studies of Biosystems, Shonan Village, Hayama, Japan, +81-46-  
16 858-1572, [terai\\_yohei@soken.ac.jp](mailto:terai_yohei@soken.ac.jp), and N. Ishiguro, Faculty of Applied Biological Sciences,  
17 Gifu University, Yanagido 1-1, Gifu 501-1193, Japan. Phone: +81-58-293-2874, Email:  
18 [ishiguna@gifu-u.ac.jp](mailto:ishiguna@gifu-u.ac.jp)

19 † These authors contributed equally.

20 **Abstract**

21 The Japanese wolf (*Canis lupus hodophilax* Temminck, 1839) was a subspecies of the gray wolf  
22 that inhabited the Japanese Archipelago and became extinct 100-120 years ago. In this study, we  
23 determined the whole genomes of nine Japanese wolves from the 19<sup>th</sup>- early 20<sup>th</sup> centuries and 11  
24 Japanese dogs and analyzed them along with both modern and ancient wolves and dogs. Genomic  
25 analyses indicate that the Japanese wolf was a unique subspecies of the gray wolf that was  
26 genetically distinct from both modern and ancient gray wolves, lacking gene flow with other gray  
27 wolves. A Phylogenetic tree that minimizes the effects of introgression shows that Japanese  
28 wolves are closest to the dog monophyletic group among the gray wolves. Moreover, Japanese  
29 wolves show significant genetic affinities with East Eurasian dogs. We estimated the level of  
30 introgression from the ancestor of the Japanese wolves to the ancestor of East Eurasian dogs that  
31 had occurred in the transitional period from the Pleistocene to the Holocene, at an early stage after  
32 divergence from West Eurasian dog lineages. Because of this introgression, Japanese wolf  
33 ancestry has been inherited by many dogs through admixture between East Eurasian dog lineages.  
34 As a result of this heredity, up to 5.5% of modern dog genomes throughout East Eurasia are  
35 derived from Japanese wolf ancestry.

36

## 37 **Introduction**

38 The phylogeny of gray wolves (*Canis lupus*) attracts wide attention from researchers and the  
39 public because wolves are the closest relatives to one of the most familiar animal species to  
40 humans, i.e., dogs. The extant gray wolves (*Canis lupus*) are divided into three lineages: the North  
41 American, Eurasian, and domestic dog lineages, including several now-extinct lineages that  
42 inhabited Eurasia during the Pleistocene (Ramos-Madrigo, et al. 2021). Recent phylogenomic  
43 analyses of gray wolves have shown that the North American gray wolf diverged at the basal  
44 ancestral position, followed by the Eurasian lineage (Fan, et al. 2016; Leathlobhair, et al. 2018).  
45 Dogs form a monophyletic clade which is the sister group to the Eurasian lineage of the gray wolf  
46 (Freedman, et al. 2014; Fan, et al. 2016; Leathlobhair, et al. 2018). Therefore, the hypothesis that  
47 the dog lineages have originated in Eurasia has been widely accepted. But there is still much  
48 debate concerning when, where, how many times, and from which population, the ancestor of  
49 dogs was domesticated (Leonard, et al. 2002; Savolainen, et al. 2002; Germonpré, et al. 2009;  
50 Pang, et al. 2009; Vonholdt, et al. 2010; Larson, et al. 2012; Axelsson, et al. 2013; Thalmann, et  
51 al. 2013; Freedman, et al. 2014; Perri 2016; Janssens, et al. 2018; Leathlobhair, et al. 2018; Perri,  
52 et al. 2021). Because no extant population of gray wolves has been reported to be more closely  
53 related to dogs than the other wolf populations, it is believed that the dog lineage has been  
54 domesticated from an extinct population of gray wolves (Larson, et al. 2012; Thalmann, et al.  
55 2013; Freedman, et al. 2014; Skoglund, et al. 2015; Fan, et al. 2016; Frantz, et al. 2016). However,  
56 no information is available about this extinct population.

57 Many regions in Eurasia, including southern East Asia (Savolainen, et al. 2002; Pang, et al.  
58 2009; Wang, et al. 2013; Wang, et al. 2016), Middle East (Vonholdt, et al. 2010), Central Asia

59 (Shannon, et al. 2015), Europe (Thalmann, et al. 2013), and both West and East Eurasia (dual  
60 origin) (Frantz, et al. 2016), have been proposed as candidates for the origin of dogs, but the  
61 debate on the origin (single, or dual) as well as the timing of domestication still continues.  
62 Divergence between the Eurasian gray wolf and dog lineages has been estimated to be 20,000-  
63 40,000 years ago (Skoglund, et al. 2015; Botigué, et al. 2017). Based on phylogenomic analyses,  
64 dogs were initially reported to be genetically divided into two distinct lineages, i.e., the West and  
65 East Eurasian lineages (Freedman, et al. 2014; Shannon, et al. 2015; Frantz, et al. 2016; Botigué,  
66 et al. 2017; Leathlobhair, et al. 2018). Subsequent reports suggested an ancient divergence of the  
67 Arctic sled dog lineage (Sinding, et al. 2020), which is closely related to the pre-contact American  
68 dogs (Leathlobhair, et al. 2018). The phylogenetic relationship between the Arctic sled dog  
69 lineage and the West and East Eurasian lineages is conflicting (Larson, et al. 2012; Frantz, et al.  
70 2016; Wang, et al. 2016), and these inconsistent topologies can be explained by either a high  
71 degree of admixture after the divergence of the three lineages, or by nearly simultaneous  
72 divergence (Frantz, et al. 2016; Zhang, et al. 2020). The West Eurasian and East Eurasian lineages  
73 diverged 17,000-24,000 years ago (Botigué, et al. 2017), and the Arctic sled dog lineage is  
74 estimated to have existed at least 9500 years ago (Sinding, et al. 2020).

75 Studies have suggested that wolf populations in Europe (Thalmann, et al. 2013), the Middle East  
76 (Vonholdt, et al. 2010), Central Asia (Shannon, et al. 2015), Siberia (Sinding, et al. 2020; Ramos-  
77 Madrigal, et al. 2021), and East Asia (Savolainen, et al. 2002; Wang, et al. 2016) have undergone  
78 introgression or bidirectional gene flow (Freedman, et al. 2014) with dogs. However, genomic  
79 introgression from gray wolves to dogs has been considered to be limited due to the presence of  
80 Eurasian wolves that do not show genetic affinity to any dog breed (Bergström, et al. 2020).

81 The Japanese wolf (*Canis lupus hodophilax* Temminck, 1839) was a subspecies of the gray wolf  
82 that inhabited Honshu, Shikoku, and Kyushu Islands in the Japanese Archipelago and became  
83 extinct 100-120 years ago (Ishiguro, et al. 2009). Molecular phylogenetic analysis of the  
84 mitochondrial genome suggests that the Japanese wolf diverged at the basal position of the extant  
85 gray wolf clade (Matsumura, et al. 2014; Matsumura, et al. 2020). Recent genome analysis of a  
86 "Honshu wolf" (one of the common names for the Japanese wolf) from the collection of the  
87 British Museum suggests that this individual is closely related to a lineage of Siberian wolves that  
88 existed in the Late Pleistocene and shows significant gene flow with Japanese dogs (Niemann, et  
89 al. 2021).

90 In this study, the genomes of nine Japanese wolves, including the type specimens, and 11  
91 Japanese dogs were newly determined and analyzed. The analyses showed that 1) the Japanese  
92 wolf was a unique subspecies of the gray wolf that is genetically distinct from both extant and  
93 ancient gray wolves known to date, 2) the Japanese wolf is most closely related to a monophyletic  
94 group of dogs, and 3) Japanese wolf ancestry has introgressed into the ancestor of East Eurasian  
95 dogs at an early stage of their history after diverging from the West Eurasian lineages, and the  
96 genome derived from Japanese wolf ancestry has been inherited by many modern dogs, even in  
97 the West Eurasian lineages, through their historical admixture with East Eurasian lineages.

98

## 99 **Results**

### 100 **Relationships between Japanese wolves and other dogs and gray wolves**

101 In this study, original genomic DNA sequences of nine Japanese wolves (22-282 Gb) and 12  
102 Japanese dogs (70-127 Gb) were determined (Table S1, Fig. S1). For the present study, we treated

103 nine individuals with Japanese wolf type mitochondrial DNA haplotypes (Matsumura, et al. 2020)  
104 as the Japanese wolf. In addition, we used sequencing data of modern gray wolves with depth of  
105 coverage >20x in the database, ancient canids with relatively high coverage, and outgroup species  
106 from the database (Table S2). All sequence data were mapped to the reference genome sequence  
107 (CanFam3.1). After haplotype calling and gvcf file merging, single nucleotide polymorphisms  
108 (SNPs) were genotyped. To examine the genetic relationship among the individuals used in this  
109 study, a principal component analysis (PCA) was performed using individuals with high coverage  
110 (Fig. 1A). In the PCA, Japanese wolves formed a distinct cluster, suggesting that Japanese wolves  
111 were genetically separated from dogs, gray wolves, and any of the outgroup species. The gray  
112 wolves were clustered into two groups, i.e., a North American/Arctic group and a Eurasian group  
113 along the PC1 axis. Dogs show an East-West cline along the PC2 axis. Dingoes and New Guinea  
114 singing dogs (NGSD) were the closest to Japanese wolves among dogs along the PC2 axis,  
115 followed by a cluster of Japanese dogs (Fig. 1A). Using the same data set we also generated an  
116 ADMIXTURE result with the lowest CV error at K=4 (Fig. 1B). In this analysis, Japanese wolves  
117 also formed clusters with higher K such as K=5 or K=6, indicating that their genetic composition  
118 was unique compared with that of the other dogs and gray wolves (Fig. 1B and S2).

119 Next, we added the three Japanese wolf individuals with low coverage [Leiden b and c, (Jentink  
120 1887), and a “Honshu wolf” (Niemann, et al. 2021), see Table S2] into the analysis. PCA showed  
121 that Leiden b and Honshu wolf were very close to the Japanese wolf cluster, while Leiden c was  
122 placed at an intermediate position between dogs and Japanese wolves (Fig. S3). ADMIXTURE  
123 analysis showed that Leiden b and Honshu wolf exhibit the same ancestry pattern as the other  
124 Japanese wolf individuals, while Leiden c seemed to be admixed with other dogs (Fig. S4). We

125 used Patterson's  $f_4$  statistic (Patterson, et al. 2012) to identify dog individuals with high genetic  
126 affinity to Leiden c to see which dog population was the source of the introgression. The dog that  
127 showed the highest affinity to Leiden c was the Japanese dog Shiba (Fig. S5A), and Leiden c  
128 contained 39% of the Shiba's genome (Fig. S5B). In contrast, Leiden b showed no affinity with  
129 dogs (Fig. S5C). These results indicate that Leiden b and Honshu wolf are included in the group  
130 of Japanese wolves with a unique genetic composition, while Leiden c is a hybrid individual  
131 between Japanese wolves and dogs. Subsequently, we removed Leiden b, c and Honshu wolf  
132 individuals from further analyses due to their low coverage.

133 A previous study (Niemann, et al. 2021) suggested that Honshu wolf has a close relationship  
134 with a lineage of Siberian wolves that existed in the Late Pleistocene and was likely to be admixed  
135 with dogs. Therefore, we added the Pleistocene wolves to our dataset which are comprised of the  
136 modern gray wolves and dogs and performed PCA (Fig. S6). Pleistocene wolves were placed  
137 closely related to Eurasian wolves, while Japanese wolves formed a distinct cluster. Our  
138 ADMIXTURE analysis (Fig. S4) suggests that Honshu wolf does not contain more DNA  
139 components of dogs than the other Japanese wolf individuals. The differences between the results  
140 of Niemann et al. 2020 and this study could be caused by differences in the number of Japanese  
141 wolves used in the analyses and/or in the coverage of DNA sequencing.

142

### 143 **Phylogenetic position of the Japanese wolves**

144 To determine the phylogenetic position of the Japanese wolves, a phylogenetic tree was  
145 constructed using the maximum likelihood (ML) method (Fig, 2A). Among gray wolves, North  
146 American/Arctic individuals branched off first at the basal position of the tree, followed by

147 European/Middle Eastern and East Asian gray wolves (also see Fig. S7). Dogs formed a  
148 monophyletic clade including East Eurasian, West Eurasian, and sled dog lineages (Fig. 2A, S7),  
149 as shown in previous studies (Freedman, et al. 2014; Shannon, et al. 2015; Frantz, et al. 2016;  
150 Botigué, et al. 2017; Leathlobhair, et al. 2018; Sinding, et al. 2020). Japanese wolves formed a  
151 monophyletic clade that was a sister group to the monophyletic clade of dogs (Fig. 2A, S7). The  
152 sister group relationship between Japanese wolves and dogs was also supported by a tree inferred  
153 by SVDQuartets and a Neighbor-Joining tree based on identity-by-state (IBS) distance (Figs. S8,  
154 S9). Analysis using outgroup- $f_3$  statistics (Patterson, et al. 2012) also showed that the Japanese  
155 wolf was the most closely related to dogs among wolves (Fig. 2B). When we further divide the  
156 dogs into subpopulations, outgroup- $f_3$  statistics showed different results between dingo/NGSD  
157 and African dogs; dingo/NGSD was related most closely to Japanese wolf while African dog is  
158 related most closely to the Middle Eastern gray wolves (Fig. S10A and S10B). The different  
159 genetic affinities of dog populations to the Japanese wolf may have resulted from introgression  
160 between African dogs and Middle Eastern gray wolves (Vonholdt, et al. 2010; Bergström, et al.  
161 2020).

162 Since the tree topology in phylogenetic analyses could be affected by introgression between taxa,  
163 a phylogenetic tree using taxa showing minimal introgression effects is expected to be the most  
164 accurate representation of population branching. Therefore, in order to obtain such a tree, we  
165 examined introgression between Japanese wolves and other dogs and wolves. We compared the  
166 genetic affinity of each dog with the Japanese wolves using  $f_3$  and  $f_4$  statistics, and found that  
167 dogs of the East Eurasian lineage (Fig. S7), in particular, dingoes, NGSDs, and Japanese dogs,  
168 showed significant affinity with the Japanese wolves ( $Z$  score > 3) (Fig. 2C, S11). In contrast,



169 dogs of the west Eurasian lineage, in particular dogs from Africa, showed low affinity to Japanese  
170 wolves (Fig. 2C, S11).  $f_4$  statistics showed no affinity between any of the gray wolf populations  
171 and Japanese wolves (Fig. 2D). Possibilities of gene flow between gray wolves except for the  
172 Japanese wolf and dogs were also examined using  $f_4$  statistics. Gray wolves in the Middle East  
173 showed strong affinity with dogs (Fig. S12), consistent with previous reports (Vonholdt, et al.  
174 2010; Bergström, et al. 2020). Based on these results, we reperformed phylogenetic analysis to  
175 confirm the relationship between Japanese wolves and dogs. To minimize the effect of  
176 introgression between wolves and dogs, we included African dogs as the sole representatives of  
177 dogs, and excluded gray wolves from the Middle East. Even in the phylogenetic tree obtained  
178 from this analysis, the Japanese wolf still formed a sister clade with African dogs (Fig. S13). Thus,  
179 we concluded that the most closely related wolves to the dog lineage are the Japanese wolves.

180

### 181 **The genome of the Japanese wolf ancestor in the dog genome**

182 Japanese wolves showed strong affinity with many East Eurasian dogs ( $f_3, f_4$  statistics) (Figs. 2C,  
183 S11), which may be caused by the introgression of dog genomes into Japanese wolves (Japanese  
184 wolf or its ancestors, hereafter simply referred to as the "the Japanese wolf genome") or vice versa.  
185 A recent report suggested widespread gene flow from dogs to gray wolves, but little gene flow  
186 from gray wolves to dogs, based on the existence of gray wolves that have no affinity with dogs  
187 (Bergström, et al. 2020). We investigated the direction of gene flow between Japanese wolves and  
188 East Eurasian dogs using the  $f_4$ -ratio (Patterson, et al. 2012). We found that the degree of genome  
189 introgression from the Japanese wolf lineage to dogs was the highest in dingoes and NGSDs  
190 (5.5%) followed by Japanese dogs (3-4%), as well as in dogs of other East Eurasian lineages (Fig.

191 3A). In contrast, genomic introgression from dogs to the Japanese wolf genome was not supported  
192 (Fig. S14). We further analyzed the possibility of a small proportion of genomic introgression  
193 from dogs to the Japanese wolf genome by the  $f_4$  statistics. If the dog genome is introgressed into  
194 the Japanese wolf genome, the genetic affinities between the Japanese wolf and dogs would be  
195 different between individuals. Indeed, the degree of affinity of Japanese wolves with  
196 dingo/NGSD varied among individuals (Fig. S15) and Jw258, Jw269, and Jw271 showed  
197 significant affinity to Japanese dogs (Fig. S16). This difference in affinity suggests that the  
198 Japanese wolf genome contains a small proportion of the dog genome that is undetectable by  $f_4$ -  
199 ratio.

200 The degree of genomic introgression from Japanese wolves to dogs was higher in East Eurasian  
201 than in West Eurasian dogs. It also varied among the dogs of East Eurasia. This variation may  
202 have been caused by multiple introgression events between the ancestors of Japanese wolves and  
203 dogs in different regions, or by a single introgression followed by diffusion of the Japanese wolf  
204 genome into various dog populations. To determine which hypothesis is more likely, we first  
205 examined the degree of gene flow among dogs in different regions. African dogs and dingo/NGSD  
206 represent opposite edges of the dog cluster in the PCA (Fig. 1A), and show the lowest and highest  
207 affinities with Japanese wolves, respectively (Fig. 2C). Among dogs, African dogs show the  
208 lowest affinity with dingo/NGSD, while dingo/NGSDs show the lowest affinity with African dogs  
209 (Fig. S17, S18). Dingoes are estimated to have been introduced to Australia between 4600 and  
210 18300 years ago based on their mitochondrial DNA (Oskarsson, et al. 2012), with archaeological  
211 evidence supporting the arrival of at least 3500 years ago (Milham and Thompson 1976). It is  
212 considered that the dingoes have been isolated in Australia since then (Larson, et al. 2012; Fan,

213 et al. 2016). African dogs are estimated to have migrated to Africa 14,000 years ago (Liu, et al.  
214 2018) and have been isolated since then (Larson, et al. 2012; Fan, et al. 2016). The African Dog  
215 and Dingo/NGSD are included in the West Eurasian and East Eurasian lineages, respectively (Fig.  
216 S7). Therefore, they are likely to be the oldest dogs of their respective lineages. The  $f_4$  statistics  
217 biplot showed that dogs showing higher affinity with dingo/NGSD show lower affinity with  
218 African dogs while dogs showing higher affinity with African dogs show lower affinity with  
219 Dingo/NGSD (Fig. S19). This negative correlation suggests most of dog populations were formed  
220 through extensive past mixing between East and West Eurasian lineages represented by  
221 dingo/NGSD and African dogs, respectively. Indeed, several dogs in South and East Asia are  
222 genomically characterized as dingo/NGSD admixed with African dogs by negative values of  $f_3$   
223 statistics (Patterson, et al. 2012) (Fig. S20).

224 Next, we examined the degree of introgression between dogs from different regions and  
225 Japanese wolves. TreeMix analysis indicates an introgression from the ancestor of Japanese  
226 wolves into the common ancestor of dingo/NGSD and Japanese dogs (Fig. 3B). The  $f_3$  biplot of  
227 affinities with dingo/NGSD and with Japanese wolves shows a positive correlation among dogs,  
228 indicating that the Japanese wolf genome has become widespread through the admixture between  
229 West and East Eurasian dog lineages and persists in the modern genomes of the East Eurasian  
230 lineage (Fig. 3C). Therefore, it is likely that the genome of the Japanese wolf ancestor was  
231 introgressed into an ancestral lineage of the East Eurasian lineage after the split of West and East  
232 Eurasian lineages. Subsequently, the East Eurasian lineage containing the Japanese wolf ancestry  
233 admixed with the West Eurasian lineage, resulting in differences in affinities with the Japanese  
234 wolves. The Southeast Asian dogs (Fig. 3C green) have a relatively higher affinity with

235 Dingo/NGSD compared to their affinity with Japanese wolves, suggesting gene flow between the  
236 Southeast Asian dogs and dogs that carried no Japanese wolf genome after the first admixture  
237 event. Similarly, Japanese dogs (Fig. 3C blue) have a relatively higher affinity with Japanese  
238 wolves compared to their affinity with Dingo/NGSD, suggesting subsequent gene flow between  
239 Japanese dogs and Japanese wolves. Hence, it is likely that the difference in the degree of genomic  
240 introgression from Japanese wolves to dogs was caused by a single introgression followed by  
241 diffusion of the Japanese wolf genome into various dog populations.

242

#### 243 **Genomic regions derived from Japanese wolf that contribute to the traits of Japanese dogs**

244 The results of  $f_4$ -ratio analysis showed that Akita, Shiba, and Kishu dogs contain 36-45% West  
245 Eurasian dog genomes (Table S3). It is expected that the genomic regions containing genes  
246 responsible for traits of the Japanese dogs are highly differentiated from those of West Eurasian  
247 dogs. If such regions overlap with the Japanese wolf-derived genomic regions (3-4%) in the  
248 modern Japanese dog genome, it could be that Japanese wolf-derived genes are responsible for  
249 the characteristic traits of the Japanese dog. To investigate such regions, we examined genomic  
250 regions derived from Japanese wolves using a  $f_{DM}$  sliding window and regions differentiated  
251 between Japanese dogs and West Eurasian dogs using an  $F_{ST}$  sliding window, and extracted  
252 overlapping regions. Six regions were found, which included four genes and the upstream or  
253 downstream regions of four genes (Fig. 3D, Fig. S21, Table S5). These regions may be candidates  
254 of genomic regions derived from Japanese wolf that contribute to the traits of Japanese dogs.

255

#### 256 **Discussion**

257 The Japanese wolves are likely to have been isolated in the Japanese archipelago until their  
258 extinction only 100 years ago. This study reveals that they form a monophyletic group with no  
259 evidence for gene flow with other Eurasian gray wolves.

260 One notable aspect of Japanese wolves is their phylogenetic position. In Eurasia, our  
261 phylogenetic analysis showed that the European lineage of the gray wolves diverged at the basal  
262 position, followed by the Middle East and East Asian lineages. In the East Asian lineage, the  
263 monophyletic group of Japanese wolves and the dog lineage form a sister-group relationship. The  
264 order in which Eurasian wolf lineages diverged is from west to east in geographical order on the  
265 Eurasian continent. Considering these phylogenetic and geographic relationships, it is most likely  
266 that it was in East Asia that the divergence between the Japanese wolf and the dog lineages has  
267 occurred. In other words, the extinct population of the gray wolf from which dogs are suspected  
268 to have been domesticated (Larson, et al. 2012; Thalmann, et al. 2013; Freedman, et al. 2014;  
269 Skoglund, et al. 2015; Fan, et al. 2016; Frantz, et al. 2016) is closely related to the ancestor of the  
270 Japanese wolf and is likely to inhabit East Asia. This hypothesis does not directly imply that the  
271 origin of dog domestication was in East Asia, nor does it directly imply that the earliest dogs  
272 descended from the ancestor of Japanese wolves. Although the domestication process would have  
273 been initiated with the animals' association with humans (Larson, et al. 2012; Perri 2016; Janssens,  
274 et al. 2018), our phylogenetic analyses provide no evidence for when dog lineages began to  
275 associate with humans. Further archaeological evidence in the studies of ancient "proto-dog"  
276 populations are required to clarify the beginnings of the dog-human relationship.

277 This study suggests ancient genomic introgression from the Japanese wolf to dogs, most likely  
278 to the ancestor of the East Eurasian lineage. The divergence between the dog lineage and the

279 Eurasian gray wolves has been estimated to be 20,000-40,000 years ago (Skoglund, et al. 2015;  
280 Botigué, et al. 2017). Dogs have been reported to have split into West Eurasian, East Eurasian,  
281 and sled dog lineages in their early divergence (Freedman, et al. 2014; Shannon, et al. 2015;  
282 Frantz, et al. 2016; Botigué, et al. 2017; Leathlobhair, et al. 2018). Because a 9500-year-old sled  
283 dog (Sinding, et al. 2020) already contained the same proportion of the Japanese wolf genome as  
284 the modern sled dog (2%: Table S4), the genomic introgression of the ancestor of the Japanese  
285 wolf to the East Eurasian lineage of dogs must have occurred before the establishment of the sled  
286 dog lineage at least 9500 years ago during the transitional period from the Pleistocene to the  
287 Holocene and shortly after the divergence of the East and West Eurasian dog lineages. The  
288 genome of NGSD was estimated to contain the Japanese wolf genome (5.5%). It is estimated that  
289 the NGSD lineage already existed by 10,900 years ago (Bergström, et al. 2020), which also  
290 supports the hypothesis that the introgression from the ancestor of Japanese wolves into dogs had  
291 occurred in the Pleistocene. The ancient dog genome data from two European individuals (4,800  
292 and 7,000 years ago) already contained about 1.6% of the Japanese wolf genome (Table S4). Since  
293 the gene flow from the Southeast Asian dog ancestry to the ancestor of these two ancient European  
294 dogs has been reported (Botigué, et al. 2017), the genome of the Japanese wolf may have been  
295 transmitted to European dogs via the Southeast Asian dog ancestry more than 7,000 years ago.

296 Although the Japanese wolf has only ever been found living in the Japanese archipelago, it is  
297 unlikely that the introgression between the ancestor of the Japanese wolf and dogs of the East  
298 Eurasian lineage occurred in the Japanese archipelago. An ancient sled dog (Sinding, et al. 2020)  
299 excavated at the same time as the excavation of the oldest dog in Japan (9600 years ago)  
300 (Shigehara and Hongo 2000) already possessed the Japanese wolf genome, suggesting that

301 introgression between the ancestor of Japanese wolves and dogs of the East Eurasian lineage had  
302 occurred before dogs were brought to the Japanese archipelago. Therefore, the introgression  
303 between the ancestral Japanese wolf and the East Eurasian lineage of dogs is most likely to have  
304 occurred somewhere in East Asia.

305 The dogs with a high proportion of the Japanese wolf genome are the dingo/NGSD (5.5%) and  
306 the Japanese dogs (3-4%). The high proportion of the dingo/NGSD is inferred to be due to their  
307 isolation in the islands of Southeast Asia and Australia, where they have escaped admixture with  
308 the West Eurasian dog lineage. NGSD is estimated to be an admixture of two lineages (Bergström,  
309 et al. 2020), and thus one of the admixed lineages may have possessed a higher proportion (~10%)  
310 of the Japanese wolf genome than NGSD. In contrast, Japanese dogs contain about 36-45% of the  
311 West Eurasian genome (Table S3), even though a high proportion of the Japanese wolf genome  
312 persists in their genomes. After the first introgression with the East Eurasian dog ancestry, the  
313 Japanese wolf genome may have introgressed into the Japanese dog genomes in the Japanese  
314 archipelago. This hypothesis is supported by the ratio of affinity with Japanese wolves and with  
315 dingoes/NGSDs, which tends to be higher in Japanese dogs (Fig. 3C). In addition, the Japanese  
316 dogs have the highest affinity to the Japanese wolf among all dogs (Fig. S16), suggesting that the  
317 Japanese wolf genome was recently introgressed into the Japanese dog genome.

318 Although only a small proportion of the Japanese wolf genome persists in modern dog genomes,  
319 the Japanese wolf genome might have an effect on dog characteristic traits. We searched for  
320 genomic regions in Japanese dogs that derived from the Japanese wolf, and that were highly  
321 differentiated between Japanese dogs and West Eurasian dogs. Six regions were found with these  
322 criteria (Fig. 3D, Fig. S21, Table S5). Despite the gene flow from Eurasian dogs, these regions

323 were differentiated between the genomes of Japanese and West Eurasian dogs. Therefore, these  
324 regions are expected to have been selected in the Japanese dogs and are the candidates of genomic  
325 regions potentially responsible for phenotypic characteristics of Japanese dogs. Further analysis  
326 of the regions selected in East Eurasian dogs and a genome-wide association study for East  
327 Eurasian dog traits should reveal the effects of the Japanese wolf genome on dog traits.

328 In this study, we demonstrated that the Japanese wolf is a sister group with the monophyletic  
329 clade of dogs. Our original results support the hypothesis that the modern dog lineage was  
330 domesticated from an extinct population of gray wolves (Larson, et al. 2012; Thalmann, et al.  
331 2013; Freedman, et al. 2014; Skoglund, et al. 2015; Fan, et al. 2016; Frantz, et al. 2016), and the  
332 Japanese wolf is the closest to this now-extinct gray wolf population. In addition, we estimated  
333 the levels of introgression from the ancestor of Japanese wolves to the ancestor of East Eurasian  
334 dogs. Accordingly, the Japanese wolf genome is expected to be involved in the early stages of  
335 dog domestication. Further analysis of the genome of the Japanese wolf and ancient dog genomes,  
336 in particular from East Eurasia, will continue to shed light on the origins of dog domestication.

337

338

## 339 **Materials and methods**

### 340 **Samples, DNA extraction, and sequencing**

341 Japanese Wolf and Japanese dog DNAs were extracted and used in our previous studies  
342 (Matsumura, et al. 2014; Matsumura, et al. 2020). The sample locations are listed in Table S1.  
343 DNAs of two individuals of Shiba (Shiba\_shiro and Shiba\_kuro) were extracted from blood  
344 samples using a DNeasy Blood & Tissue Kit (Qiagen) following the manufacturer's instructions.



345 The NEBNext Ultra II DNA Library Prep Kit for Illumina (New England Bio Labs, Ipswich, MA,  
346 USA) was used to construct libraries from genomic DNA following the manufacturer's  
347 instructions. Paired-end (2 × 150 bp) sequencing was performed on the Illumina HiSeq X or  
348 NovaSeq 6000 platforms.

349 For Leiden b and Leiden c, the genome capture was performed using the SeqCap EZ  
350 Hybridization and Wash Kit (Roche, Basel, Switzerland), SeqCap EZ Accessory Kit v2 (Roche),  
351 SeqCap HE-Oligo Kit (Roche), and SeqCap EZ Pure Capture Bead Kit (Roche) following the  
352 manufacturer's instructions for SeqCap EZ Library SR (Roche), with minor modifications.  
353 Briefly, Biotin-labeled genomic DNA fragments from Shiba were used as hybridization probes,  
354 instead of the SeqCap EZ library (Roche). Leiden b and Leiden c libraries were mixed with 135  
355 ng of Biotin-labeled genomic DNA fragments and were hybridized at 47°C for 72 h. Other  
356 procedures were performed in accordance with the manufacturer's instructions. Total mapped  
357 reads are listed in Table S1.

358

### 359 **Extraction of SNPs and vcf file preparation**

360 Sequence reads from the genomic DNA libraries of nine Japanese wolves, eleven Japanese dogs  
361 (Table S1) as well as 88 wolves/dogs and six outgroup species from the database (Table S2) were  
362 trimmed to remove adaptor sequences and mapped to the dog reference genome (CanFam3.1)  
363 using CLC Genomics Workbench (<https://www.qiagenbioinformatics.com/>). Reads showing high  
364 similarity (> 90% in > 90% of read length) were mapped to the reference genome sequences and  
365 reads mapped to more than one position were removed ("ignore" option for reads mapped to  
366 multiple positions). The mapping data was exported in bam file format and sorted and indexed

367 using samtools (Li, et al. 2009). The duplicated reads in bam files were marked by the  
368 MarkDuplicates algorithm implemented in GATK v4.2 (<https://gatk.broadinstitute.org/hc/en-us>).  
369 We performed genotype calling on all individuals analyzed in this study using the  
370 HaplotypeCaller algorithm in GATK v4.2. Genotypes of all individuals were output as gvcf  
371 format (-ERC GVCF option) and filtered by the VariantFiltration algorithm in GATK v4.2 with  
372 default parameters. All gvcf files were combined into a single gvcf format file by the  
373 CombineGVCFs algorithm in GATK v4.2. The combined file was genotyped by the  
374 GenotypeGVCFs algorithm and filtered by FilterVcf in GATK v4.2 with parameters; --filter-  
375 expression "QD < 2.0" --filter-name "QD2" --filter-expression "QUAL < 30.0" --filter-name  
376 "QUAL30" --filter-expression "FS > 200.0" --filter-name "FS200" --filter-expression "SOR >  
377 10.0" --filter-name "SOR10" --filter-expression "ReadPosRankSum < -20.0" --filter-name  
378 "ReadPosRankSum-20".

379 To maximize the number of SNPs for analyses without missingness, we prepared vcf files for  
380 each analysis using vcftools (Danecek, et al. 2011). When including all individuals except for  
381 ancient samples and Leiden b, Leiden c, and Honshu wolf (see the sample combination in Table  
382 S2), we removed all indels, singleton, and doubleton sites to eliminate PCR and sequencing errors  
383 that may have occurred in one individual, and extracted bi-allelic sites with coverage equal to or  
384 more than three in all individuals and with GQ values equal to or more than eight in all individuals.  
385 Mutations due to DNA damage at both ends of fragments were less than 1% in Japanese wolves  
386 (Fig. S1), therefore we can infer that mutations by DNA damage in the sequences of Japanese  
387 wolves were removed by this filtration. For analyses with ancient samples, sites were filtered  
388 using the same conditions as with modern samples. In addition, we used only transversion sites

389 for the analyses of ancient samples. For the PCA and ADMIXTURE analyses with Liden b and  
390 Liden c, sites with missingness greater than 3% and minor allele frequency (MAF) < 0.04 were  
391 excluded. Sites were filtered using the same conditions as with modern samples, and only  
392 transversion sites were used.

393

#### 394 **Phylogenetic analysis**

395 The SNPs in a vcf file including dogs, wolves and Japanese wolves (see Table S2) were converted  
396 to PHYLIP format. 10 kb sequences from the 5' end of the PHYLIP format file were extracted  
397 and a model for Maximum Likelihood method was selected using MEGA ver. X (Kumar, et al.  
398 2018). A phylogenetic tree was constructed using the Maximum Likelihood (ML) method using  
399 PhyML ver. 3.2 (Guindon, et al. 2010) with a model selection option “-m GTR” and with 100  
400 bootstrap replications. ML trees were constructed using all individuals (Fig. S7: 489,524 SNPs),  
401 selected individuals (Fig. 2A: 1,971,890 SNPs), and outgroup species (Table S2), wolves,  
402 Japanese wolves, and African dogs (Fig. S13: 2,065,200 SNPs).

403 The same vcf file used in the ML method (Fig. S7: 489,524 SNPs) was converted to NEXUS  
404 format. A phylogenetic tree was constructed by the svdq algorithm (Chifman and Kubatko 2014)  
405 in PAUP\* ver. 4a (Wilgenbusch and Swofford 2003) with 100 bootstrap replications (Fig. S8).  
406 We used PLINK ver. 1.9 (Purcell, et al. 2007) with an option “—distance 1-ibs” to calculate an  
407 Identity By State (IBS) distance matrix using 1,992,260 SNPs. A neighbour joining tree was  
408 constructed from the IBS distance matrix using MEGA ver. X (Kumar, et al. 2018)(Fig. S9).

409

#### 410 **Principal component analysis and ADMIXTURE**

411 We performed a principal component analysis (PCA) using PLINK ver. 1.9 (Purcell, et al. 2007)  
412 with an option “--indep-pairwise 50 10 0.1” to explore the affinity among gray wolves, Japanese  
413 wolves, and dogs (Figure 1A). We also performed PCA with type specimens of Japanese wolf  
414 (Fig. S3), and with ancient canids (Fig. S6).

415 ADMIXTURE ver. 1.3 (Alexander and Lange 2011) was run on the dataset of modern samples  
416 (Fig. 1B and Fig. S2) and modern specimens with type specimens of Japanese wolf (Fig. S4)  
417 assuming 2 to 8 clusters (K=2-8).

418

#### 419 ***f*3, *f*4 statistics, and *f*4-ratio**

420 *f*3, *f*4 statistics, and *f*4-ratio implemented in ADMIXTOOLS ver. 7.0.1 (Patterson, et al. 2012)  
421 were used to evaluate the shared genetic drift among gray wolves, Japanese wolves, and dogs.  
422 We used the same SNPs data set used for the phylogenetic analysis for all modern samples  
423 (489,524 SNPs). For Liden b and Leiden c analyses, vcf files were prepared to maximize the  
424 number of SNPs (Table S2).

425 Outgroup *f*3 statistics were calculated to explore shared genetic drift between all dogs and each  
426 of the wolves (Fig. 2B), African dogs and each of the wolves (Fig. S10A), dingo/NGSD dogs and  
427 each of the wolves (Fig. S10B), Japanese wolf and each of the dogs (Fig. 2C), African dogs and  
428 each of the other dogs (Fig. S17A), and dingo/NGSD dogs and each of the other dogs (Fig. S17B).

429 *f*3 statistics were calculated to test the genomic mixture of African and dingo/NGSD dogs in all  
430 dogs (Fig. S20).

431 *f*4 statistics were calculated to explore shared genetic drift between each of the dogs and Leiden  
432 c (Fig. S5A: 38,254 SNPs), each of the dogs and Leiden b (Fig. S5C: 83,259 SNPs), each of the

433 wolves and Japanese wolves (Fig. 2D), each of the dogs and Japanese wolves (Fig. S11), each of  
434 the dogs and each of the wolves (Fig. S12), dingo/NGSD and Japanese wolves (Fig. S15), each  
435 of the dogs and Japanese wolves (Fig. S16), NGSD1 or Basenji and each of the dogs (Fig. S18),  
436 and dingoes and each of the other dogs, and African dogs and each of the other dogs (Fig. S19)  
437

#### 438 **TreeMix**

439 To examine the admixture events, we used TreeMix (Pickrell and Pritchard 2012) to build a tree  
440 with admixture edges. We used major groups of gray wolves and dogs as follows; Gray Wolves  
441 (North America: n = 2), Gray Wolves (Canada/Arctic: n = 8), Gray Wolves (East Asia: n =5),  
442 Gray Wolves (West Eurasia: n = 7), Japanese Wolves (Japan: n = 7), Dogs (Central Asian: n = 4),  
443 Dogs (Europe: n = 11), Dogs (Africa: n = 10), Dogs (sled dogs: n = 4), Dogs (Vietnamese  
444 Indigenous: n = 5), Ding/NGSD (Oceania: n = 7 ), Japanese Dogs (Japan: n = 11 ), and Dogs  
445 (Korea: n = 6). The SNPs were pruned based on linkage disequilibrium (LD-pruning) by using  
446 plink with an option "--indep-pairwise 50 10 0.12. As a result of LD-pruning, 150,502 SNPs were  
447 used for TreeMix.

448

#### 449 **Assessing DNA damage patterns**

450 We used mapDamage ver. 2.2.0 (Ginolhac, et al. 2011) to assess DNA damage patterns in the  
451 Japanese wolf samples sequenced in this study. Mapped reads from the Japanese wolf samples  
452 showed slightly increased proportion (equal to or less than 1%) of C to T and G to A substitutions  
453 at the 5' and 3' read ends, respectively (Fig. S1).

454

455 **Calculation of maximum contamination rate**

456 We used substitutions in mitochondria DNA specific to Japanese wolf to assess the contamination  
457 rate of the other animal DNA in Japanese wolf DNA. Fifteen fixed substitutions unique to  
458 Japanese wolf were selected using an alignment of mitochondria DNA sequences including gray  
459 wolves, Japanese wolves, and dogs used in previous studies (Matsumura, et al. 2014; Matsumura,  
460 et al. 2020). The lowest coverage at fifteen sites was 48 (highest was 28,324) in the mapping  
461 result to the mitochondria genome in CanFam3.1. We calculated the average mapping ratio in  
462 fifteen sites. The ratio of the reads mapped to the fifteen sites without substitutions specific to  
463 Japanese wolf were assumed as the maximum contamination rate (Table S6), because the  
464 mitochondria DNA like sequences are found in the nuclear genome.

465

466 **Detection of genomic regions that are derived from Japanese wolf and may have contributed**  
467 **to Japanese dog characteristics**

468 The genomic regions containing genes that form the characteristics of the Japanese dog are  
469 expected to be largely differentiated between the Japanese dog and the West Eurasian dog. To  
470 detect such regions, we examined sequences differentiated between Japanese dogs and West  
471 Eurasian dogs by using  $F_{ST}$  sliding window analysis. Using SNPs of Japanese dogs and African  
472 dogs (Table S2) in a vcf file,  $F_{ST}$  values for all sites were computed by vcftools v0.1.16 (Danecek,  
473 et al. 2011). The average  $F_{ST}$  values in windows of 50 SNPs with a 25 SNPs slide across  
474 chromosomes were calculated by RStudio version (1.4.1106) (RStudio Team 2020. RStudio:  
475 Integrated Development for R. RStudio, PBC, Boston, MA). The Japanese wolf-derived genomic  
476 regions were calculated by  $f_{dM}$  values in windows of 50 SNPs with a 25 SNPs slide across

477 chromosomes using Dsuite (Malinsky, et al. 2021). Then, we extracted regions of overlap between  
478 high  $F_{ST}$  regions (top 1%) and the Japanese wolf-derived genomic regions (top 1% of  $f_{DM}$  values).

479

480

#### 481 **Availability of data**

482 The nucleotide sequences were deposited in the DDBJ Sequenced Read Archive.

483

#### 484 **Funding**

485 This work was supported by JSPS KAKENHI Grant Number JP19H05343 and JP21H00341 to  
486 Y.T., JP17K01193 and JP20K01104 to N. I., and Grant Number JP16H06279 (PAGS).

487

#### 488 **Acknowledgments**

489

#### 490 **Author contributions**

491 JG: data analyses and manuscript writing; NA: next generation sequencing and vcf file  
492 preparation of modern samples; XX: assessing DNA damage patterns; YM: genomic DNA  
493 extraction of Shiba individuals and next generation sequencing; SM: preparation of an alignment  
494 of mitochondrial DNA sequences and manuscript editing; HT: archeological information for  
495 discussion and manuscript editing; NI preparation of genomic DNA of the Japanese wolves and  
496 Japanese dogs and manuscript editing; YT: research concept, research plan, next generation  
497 sequencing, vcf file preparation, data analyses, and manuscript writing.

498

499 **References**

- 500 Alexander DH, Lange K. 2011. Enhancements to the ADMIXTURE algorithm for individual  
501 ancestry estimation. *BMC bioinformatics* 12:1-6.
- 502 Axelsson E, Ratnakumar A, Arendt M-L, Maqbool K, Webster MT, Perloski M, Liberg O,  
503 Arnemo JM, Hedhammar A, Lindblad-Toh K. 2013. The genomic signature of dog  
504 domestication reveals adaptation to a starch-rich diet. *Nature* 495:360-364.
- 505 Bergström A, Frantz L, Schmidt R, Ersmark E, Lebrasseur O, Girdland-Flink L, Lin AT, Storå J,  
506 Sjögren K-G, Anthony D. 2020. Origins and genetic legacy of prehistoric dogs. *Science*  
507 370:557-564.
- 508 Botigué LR, Song S, Scheu A, Gopalan S, Pendleton AL, Oetjens M, Taravella AM, Seregély T,  
509 Zeeb-Lanz A, Arbogast R-M. 2017. Ancient European dog genomes reveal continuity since  
510 the Early Neolithic. *Nature communications* 8:1-11.
- 511 Chifman J, Kubatko L. 2014. Quartet inference from SNP data under the coalescent model.  
512 *Bioinformatics* 30:3317-3324.
- 513 Danecek P, Auton A, Abecasis G, Albers CA, Banks E, DePristo MA, Handsaker RE, Lunter G,  
514 Marth GT, Sherry ST. 2011. The variant call format and VCFtools. *Bioinformatics* 27:2156-  
515 2158.
- 516 Fan Z, Silva P, Gronau I, Wang S, Armero AS, Schweizer RM, Ramirez O, Pollinger J, Galaverni  
517 M, Del-Vecchio DO. 2016. Worldwide patterns of genomic variation and admixture in gray  
518 wolves. *Genome research* 26:163-173.
- 519 Frantz LA, Mullin VE, Pionnier-Capitan M, Lebrasseur O, Ollivier M, Perri A, Linderholm A,  
520 Mattiangeli V, Teasdale MD, Dimopoulos EA. 2016. Genomic and archaeological evidence  
521 suggest a dual origin of domestic dogs. *Science* 352:1228-1231.
- 522 Freedman AH, Gronau I, Schweizer RM, Ortega-Del Vecchio D, Han E, Silva PM, Galaverni M,  
523 Fan Z, Marx P, Lorente-Galdos B. 2014. Genome sequencing highlights the dynamic early  
524 history of dogs. *PLoS genetics* 10:e1004016.
- 525 Germonpré M, Sablin MV, Stevens RE, Hedges RE, Hofreiter M, Stiller M, Després VR. 2009.  
526 Fossil dogs and wolves from Palaeolithic sites in Belgium, the Ukraine and Russia:  
527 osteometry, ancient DNA and stable isotopes. *Journal of Archaeological Science* 36:473-490.
- 528 Ginolhac A, Rasmussen M, Gilbert MTP, Willerslev E, Orlando L. 2011. mapDamage: testing for  
529 damage patterns in ancient DNA sequences. *Bioinformatics* 27:2153-2155.



- 530 Guindon S, Dufayard J-F, Lefort V, Anisimova M, Hordijk W, Gascuel O. 2010. New algorithms  
531 and methods to estimate maximum-likelihood phylogenies: assessing the performance of  
532 PhyML 3.0. *Systematic biology* 59:307-321.
- 533 Ishiguro N, Inoshima Y, Shigehara N. 2009. Mitochondrial DNA analysis of the Japanese wolf  
534 (*Canis lupus hodophilax* Temminck, 1839) and comparison with representative wolf and  
535 domestic dog haplotypes. *Zoological science* 26:765-770.
- 536 Janssens L, Giemsch L, Schmitz R, Street M, Van Dongen S, Crombé P. 2018. A new look at an  
537 old dog: Bonn-Oberkassel reconsidered. *Journal of Archaeological Science* 92:126-138.
- 538 Jentink F. 1887. *Catalogue ostéologique des Mammifères (Singes, Carnivores, Ruminants,*  
539 *Pachydermes, Sirènes et Cétacés): Muséum d'Histoire Naturelle des Pays-Bas.*
- 540 Kumar S, Stecher G, Li M, Knyaz C, Tamura K. 2018. MEGA X: molecular evolutionary genetics  
541 analysis across computing platforms. *Molecular biology and evolution* 35:1547.
- 542 Larson G, Karlsson EK, Perri A, Webster MT, Ho SY, Peters J, Stahl PW, Piper PJ, Lingaas F,  
543 Fredholm M. 2012. Rethinking dog domestication by integrating genetics, archeology, and  
544 biogeography. *Proceedings of the National Academy of Sciences* 109:8878-8883.
- 545 Leathlobhair MN, Perri AR, Irving-Pease EK, Witt KE, Linderholm A, Haile J, Lebrasseur O,  
546 Ameen C, Blick J, Boyko AR. 2018. The evolutionary history of dogs in the Americas.  
547 *Science* 361:81-85.
- 548 Leonard JA, Wayne RK, Wheeler J, Valadez R, Guillén S, Vila C. 2002. Ancient DNA evidence  
549 for Old World origin of New World dogs. *Science* 298:1613-1616.
- 550 Li H, Handsaker B, Wysoker A, Fennell T, Ruan J, Homer N, Marth G, Abecasis G, Durbin R.  
551 2009. The sequence alignment/map format and SAMtools. *Bioinformatics* 25:2078-2079.
- 552 Liu Y-H, Wang L, Xu T, Guo X, Li Y, Yin T-T, Yang H-C, Hu Y, Adeola AC, Sanke OJ. 2018.  
553 Whole-genome sequencing of African dogs provides insights into adaptations against  
554 tropical parasites. *Molecular biology and evolution* 35:287-298.
- 555 Malinsky M, Matschiner M, Svardal H. 2021. Dsuite-Fast D-statistics and related admixture  
556 evidence from VCF files. *Molecular Ecology Resources* 21:584-595.
- 557 Matsumura S, Inoshima Y, Ishiguro N. 2014. Reconstructing the colonization history of lost wolf  
558 lineages by the analysis of the mitochondrial genome. *Molecular phylogenetics and*  
559 *evolution* 80:105-112.
- 560 Matsumura S, Terai Y, Hongo H, Ishiguro N. 2020. Analysis of the Mitochondrial genomes of  
561 Japanese Wolf specimens in the Siebold Collection, Leiden. *Zoological science* 38:60-66.
- 562 Milham P, Thompson P. 1976. Relative antiquity of human occupation and extinct fauna at

- 563 Madura Cave, southeastern Western Australia. *The Australian Journal of Anthropology*  
564 10:175.
- 565 Niemann J, Gopalakrishnan S, Yamaguchi N, Ramos-Madrigal J, Wales N, Gilbert MTP, Sinding  
566 M-HS. 2021. Extended survival of Pleistocene Siberian wolves into the early 20th century  
567 on the island of Honshū. *Iscience* 24:101904.
- 568 Oskarsson M, Klütsch C, Boonyaparakob U, Wilton A, Tanabe Y, Savolainen P. 2012.  
569 Mitochondrial DNA data indicate an introduction through Mainland Southeast Asia for  
570 Australian dingoes and Polynesian domestic dogs. *Proceedings of the Royal Society B:*  
571 *Biological Sciences* 279:967-974.
- 572 Pang J-F, Kluetsch C, Zou X-J, Zhang A-b, Luo L-Y, Angleby H, Ardalan A, Ekström C,  
573 Sköllermo A, Lundeberg J. 2009. mtDNA data indicate a single origin for dogs south of  
574 Yangtze River, less than 16,300 years ago, from numerous wolves. *Molecular biology and*  
575 *evolution* 26:2849-2864.
- 576 Patterson N, Moorjani P, Luo Y, Mallick S, Rohland N, Zhan Y, Genschoreck T, Webster T, Reich  
577 D. 2012. Ancient admixture in human history. *Genetics* 192:1065-1093.
- 578 Perri A. 2016. A wolf in dog's clothing: Initial dog domestication and Pleistocene wolf variation.  
579 *Journal of Archaeological Science* 68:1-4.
- 580 Perri AR, Feuerborn TR, Frantz LA, Larson G, Malhi RS, Meltzer DJ, Witt KE. 2021. Dog  
581 domestication and the dual dispersal of people and dogs into the Americas. *Proceedings of*  
582 *the National Academy of Sciences* 118.
- 583 Pickrell J, Pritchard J. 2012. Inference of population splits and mixtures from genome-wide allele  
584 frequency data. *PLoS genetics* 11.
- 585 Purcell S, Neale B, Todd-Brown K, Thomas L, Ferreira M, Bender D, Maller J, Sklar P, de Bakker  
586 P, Daly M, et al. 2007. PLINK: a toolset for whole-genome association and population-based  
587 linkage analyses. *American Journal of Human Genetics* 81:559-575.
- 588 Ramos-Madrigal J, Sinding M-HS, Carøe C, Mak S, Niemann J, Castruita JAS, Fedorov S,  
589 Kandyba A, Germonpré M, Bocherens H. 2021. Genomes of Pleistocene Siberian wolves  
590 uncover multiple extinct wolf lineages. *Current Biology* 31:198-206. e198.
- 591 Savolainen P, Zhang Y-p, Luo J, Lundeberg J, Leitner T. 2002. Genetic evidence for an East Asian  
592 origin of domestic dogs. *Science* 298:1610-1613.
- 593 Shannon LM, Boyko RH, Castelhana M, Corey E, Hayward JJ, McLean C, White ME, Abi Said  
594 M, Anita BA, Bondjengo NI. 2015. Genetic structure in village dogs reveals a Central Asian  
595 domestication origin. *Proceedings of the National Academy of Sciences* 112:13639-13644.

- 596 Shigehara N, Hongo H. 2000. Ancient remains of Jomon dogs from Neolithic sites in Japan. *BAR*  
597 *International Series* 889:61-70.
- 598 Sinding M-HS, Gopalakrishnan S, Ramos-Madrugal J, de Manuel M, Pitulko VV, Kuderna L,  
599 Feuerborn TR, Frantz LA, Vieira FG, Niemann J. 2020. Arctic-adapted dogs emerged at the  
600 Pleistocene–Holocene transition. *Science* 368:1495-1499.
- 601 Skoglund P, Ersmark E, Palkopoulou E, Dalén L. 2015. Ancient wolf genome reveals an early  
602 divergence of domestic dog ancestors and admixture into high-latitude breeds. *Current*  
603 *Biology* 25:1515-1519.
- 604 Thalmann O, Shapiro B, Cui P, Schuenemann VJ, Sawyer SK, Greenfield D, Germonpré MB,  
605 Sablin MV, López-Giráldez F, Domingo-Roura X. 2013. Complete mitochondrial genomes  
606 of ancient canids suggest a European origin of domestic dogs. *Science* 342:871-874.
- 607 Vonholdt BM, Pollinger JP, Lohmueller KE, Han E, Parker HG, Quignon P, Degenhardt JD,  
608 Boyko AR, Earl DA, Auton A. 2010. Genome-wide SNP and haplotype analyses reveal a  
609 rich history underlying dog domestication. *Nature* 464:898-902.
- 610 Wang G, Zhai W, Yang H-c, Fan R-x, Cao X, Zhong L, Wang L, Liu F, Wu H, Cheng L-g. 2013.  
611 The genomics of selection in dogs and the parallel evolution between dogs and humans.  
612 *Nature communications* 4:1-9.
- 613 Wang G-D, Zhai W, Yang H-C, Wang L, Zhong L, Liu Y-H, Fan R-X, Yin T-T, Zhu C-L, Poyarkov  
614 AD. 2016. Out of southern East Asia: the natural history of domestic dogs across the world.  
615 *Cell research* 26:21-33.
- 616 Wilgenbusch JC, Swofford D. 2003. Inferring evolutionary trees with PAUP. *Current protocols in*  
617 *bioinformatics*:6.4. 1-6.4. 28.
- 618 Zhang M, Sun G, Ren L, Yuan H, Dong G, Zhang L, Liu F, Cao P, Ko AM-S, Yang MA, et al.  
619 2020. Ancient DNA evidence from China reveals the expansion of pacific dogs. *Molecular*  
620 *biology and evolution* 37:1462-1469.

621

## 622 **Figure legends**

623 Figure 1 Relationships between Japanese wolves and other canids

624 (A) Principal Components Analysis (PC1 versus PC2) of 100 samples based on 2,065,200 SNPs

625 (see Table S2 for sample information). Colored circle, square, and triangle correspond to the

626 names of dogs or wolves in the panel. (B) ADMIXTURE results based on SNP data for  $K = 4$   
627 (see Table S2 for sample information).

628

629 Figure 2 Phylogenetic relationships and genetic affinity between Japanese wolves and other  
630 canids. (A) Maximum likelihood tree based on 1,971,890 SNPs. Node labels shown in blue  
631 squares indicate bootstrap values out of 100. (B) Shared genetic drift between dogs and gray  
632 wolves measured by outgroup  $f_3$  statistics. Each of all dogs and Japanese wolves were used as  
633 populations. Each  $f_3$  statistical value is plotted in order of highest to lowest value from the top,  
634 and the names of the wolves are shown on the right side of the panel. Error bars represent standard  
635 errors. (C) Shared genetic drift between Japanese wolf and all dogs measured by outgroup  $f_3$   
636 statistics. Each of the African dogs and Dingo/NGSD individuals were used as populations. Each  
637  $f_3$  statistical value is plotted in order of highest to lowest value from the top, and the names of the  
638 dogs are shown on the left side of the panel. Error bars represent standard errors. (D)  $f_4$  statistics  
639 testing the relationships between the Japanese wolf and all other wolves compared with NGSD1  
640 (left panel) and Basenji (right panel). Each Z score is plotted in order of highest to lowest value  
641 from the top, and the names of wolves are shown on the left and right sides of the left and right  
642 panels, respectively. Gray lines show the Z score -3 and 3.

643

644 Figure 3 Admixture between Japanese wolves and the other canids.

645 (A)  $f_4$ -ratio test to estimate proportion of genome introgression from the Japanese wolf to  
646 dogs. Each  $f_4$ -ratio  $\alpha$  value is plotted in order of highest to lowest value from the top, and the  
647 names of the dogs are shown on the right side of the panel. Error bars represent standard errors.

648 Z score above 3 is colored in blue. (B) TreeMix admixture graph built using LD-pruned data  
649 (150,502 sites) on a dataset consisting of 88 dogs/wolves merged into 13 groups according to their  
650 phylogenetic relationships. (C)  $f_3$  statistics testing whether dogs share more alleles with  
651 dingo/NGSD (x-axis) or Japanese wolf (y-axis). Dots show the  $f_3$  statistics, and horizontal and  
652 vertical error bars represent standard errors for tests with the African dogs (x-axis) and  
653 dingo/NGSD (y-axis), respectively. Each of the Japanese wolves and dingo/NGSD individuals  
654 were used as populations. (D) Sliding window analyses of the  $F_{ST}$  values (y-axis: upper panel)  
655 and  $f_{dM}$  (y-axis: lower panel) in windows of 50 SNPs using a 25 SNPs slide across chromosome  
656 (x-axis). Dashed lines show the 99th percentiles. Blue arrow indicates overlapping regions above  
657 99th percentiles between upper and lower panels. The gene name above the arrow is the gene in  
658 the overlapped region.

659

660

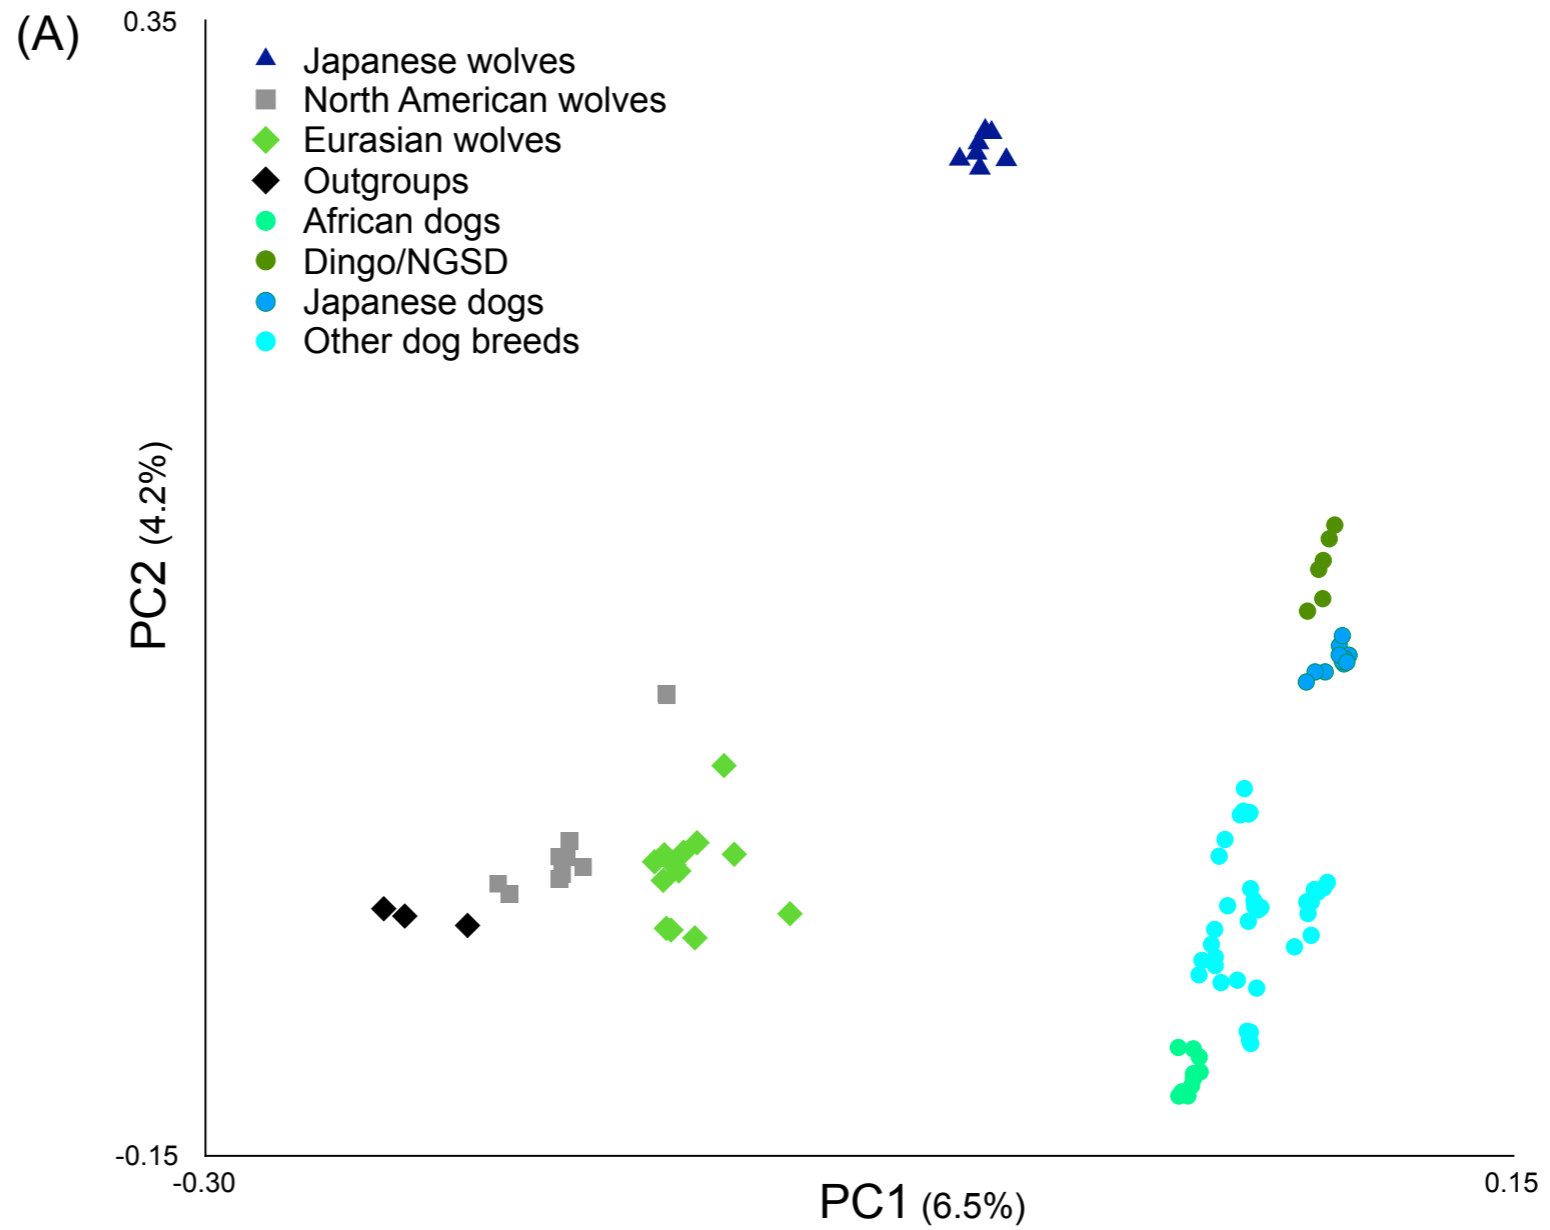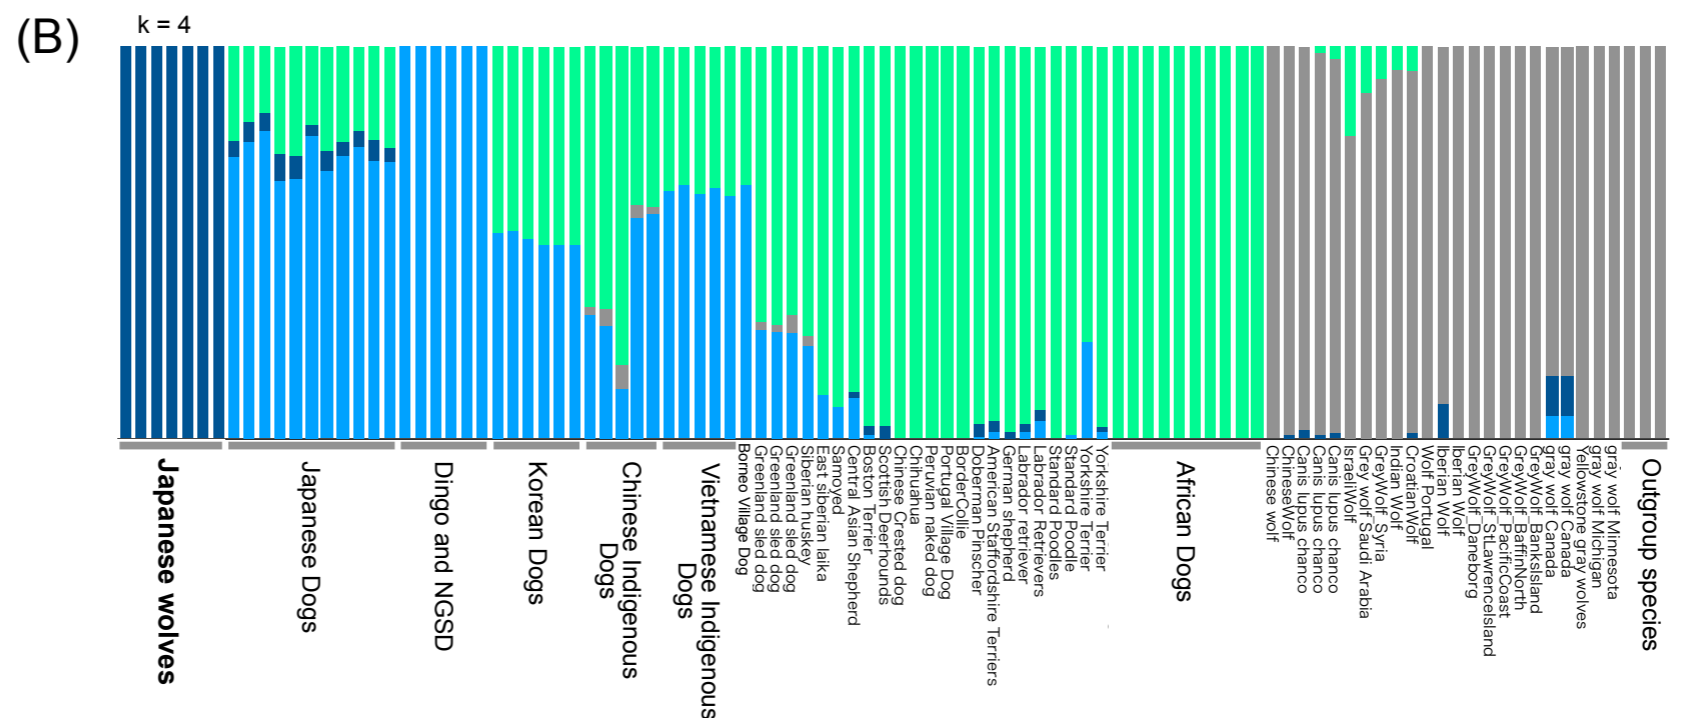

Figure 1 Relationships between Japanese wolves and other canids

(A) Principal Components Analysis (PC1 versus PC2) of 100 samples based on 2,065,200 SNPs (see Table S2 for sample information). Colored circle, square, and triangle correspond to the names of dogs or wolves in the panel. (B) ADMIXTURE results based on SNP data for  $K = 4$  (see Table S2 for sample information).

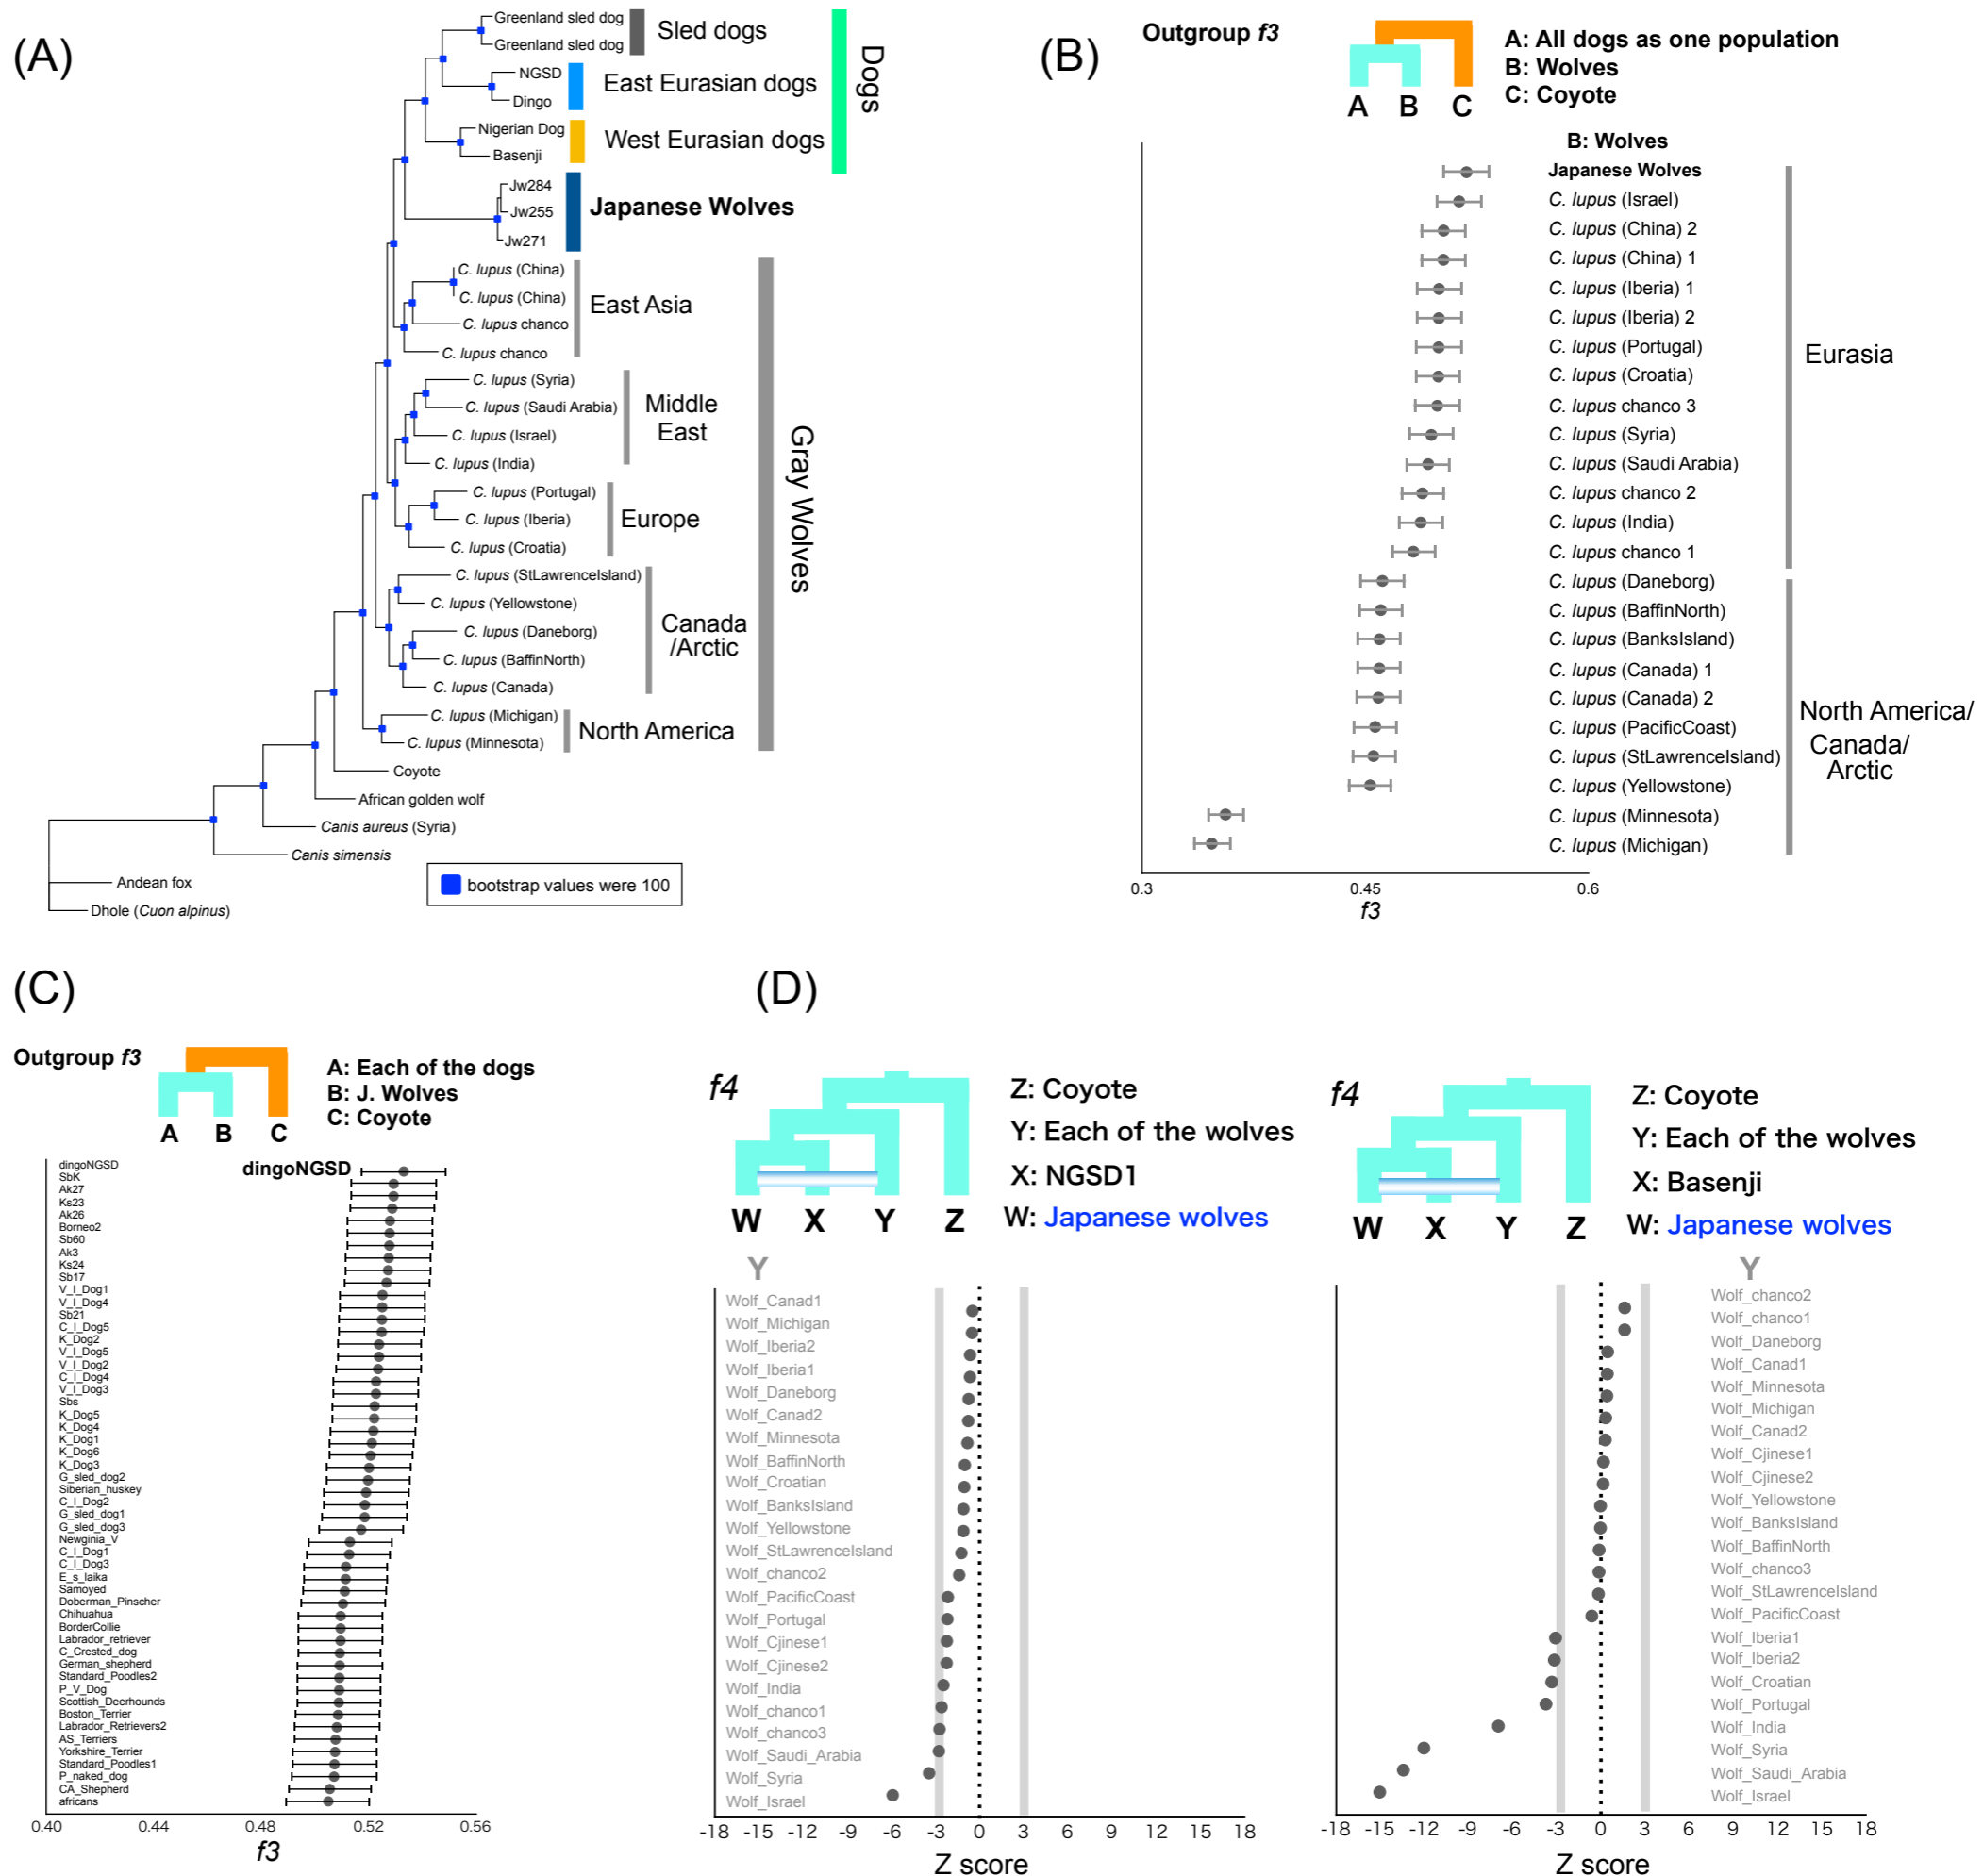

Figure 2 Phylogenetic relationships and genetic affinity between Japanese wolves and other canids.

(A) Maximum likelihood tree based on 1,971,890 SNPs. Node labels shown in blue squares indicate bootstrap values out of 100. (B) Shared genetic drift between dogs and gray wolves measured by outgroup  $f_3$  statistics. Each of all dogs and Japanese wolves were used as populations. Each  $f_3$  statistical value is plotted in order of highest to lowest value from the top, and the names of the wolves are shown on the right side of the panel. Error bars represent standard errors. (C) Shared genetic drift between Japanese wolf and all dogs measured by outgroup  $f_3$  statistics. Each of the African dogs and Dingo/NGSD individuals were used as populations. Each  $f_3$  statistical value is plotted in order of highest to lowest value from the top, and the names of the dogs are shown on the left side of the panel. Error bars represent standard errors. (D)  $f_4$  statistics testing the relationships between the Japanese wolf and all other wolves compared with NGSD1 (left panel) and Basenji (right panel). Each Z score is plotted in order of highest to lowest value from the top, and the names of wolves are shown on the left and right sides of the left and right panels, respectively. Gray lines show the Z score -3 and 3.

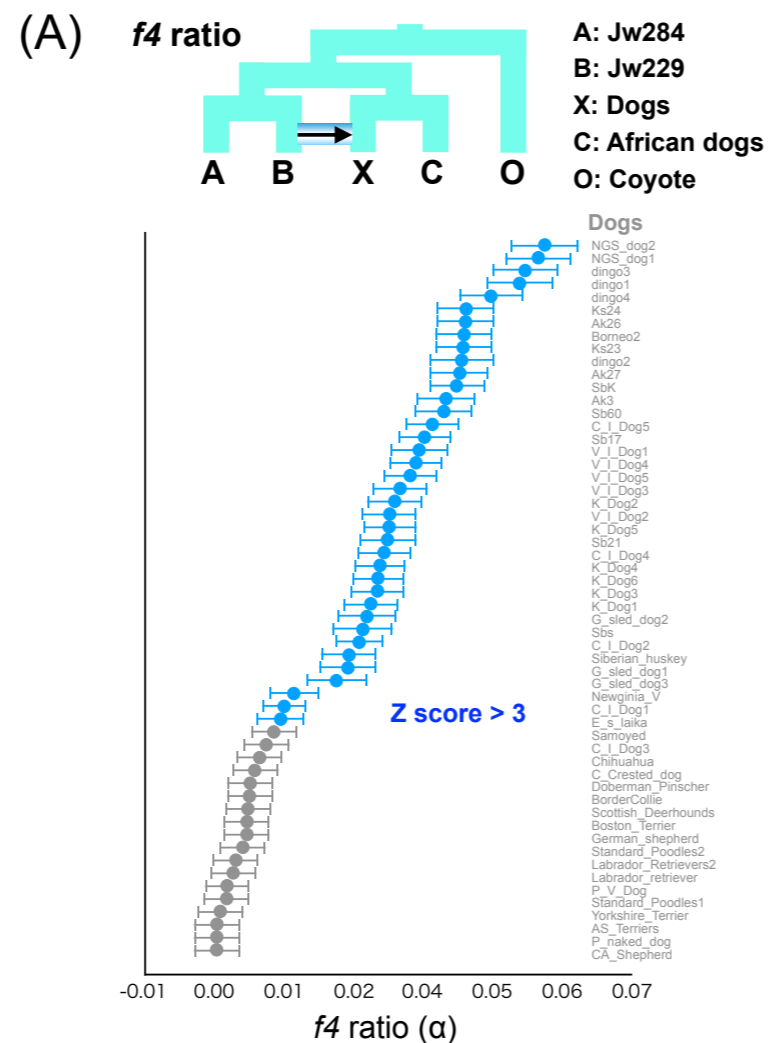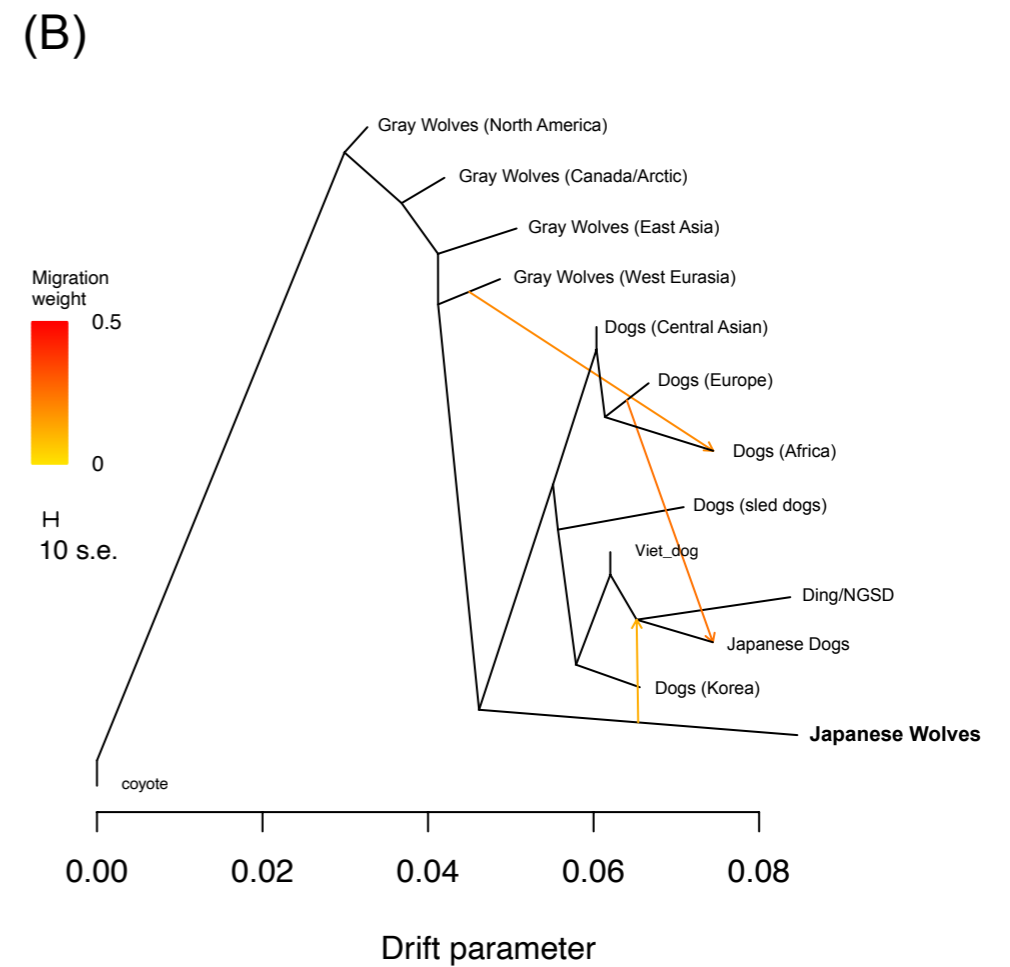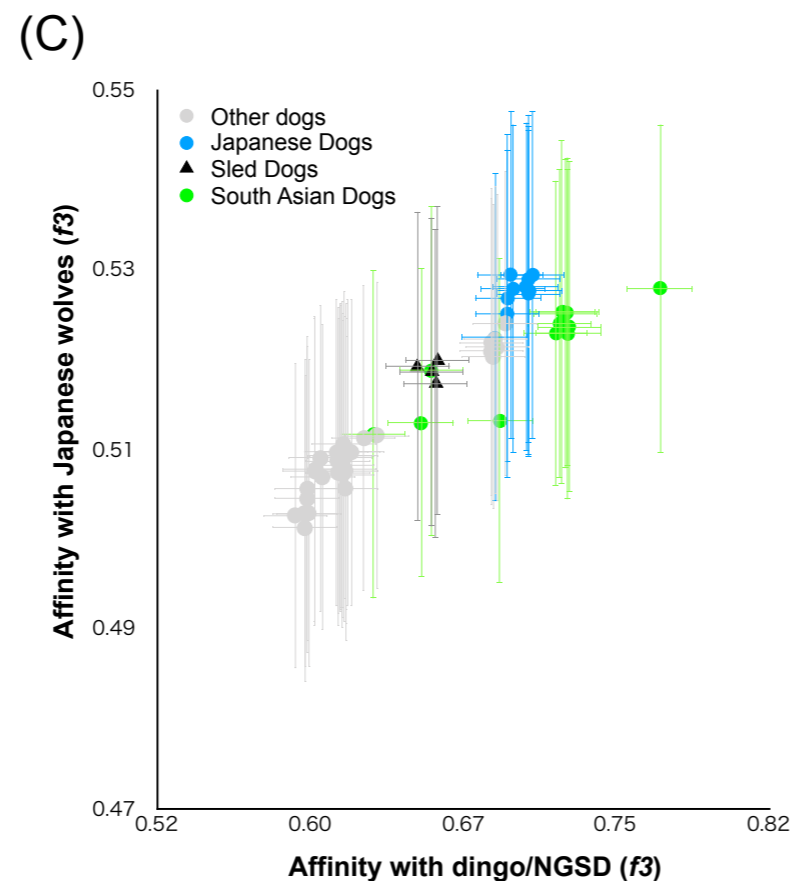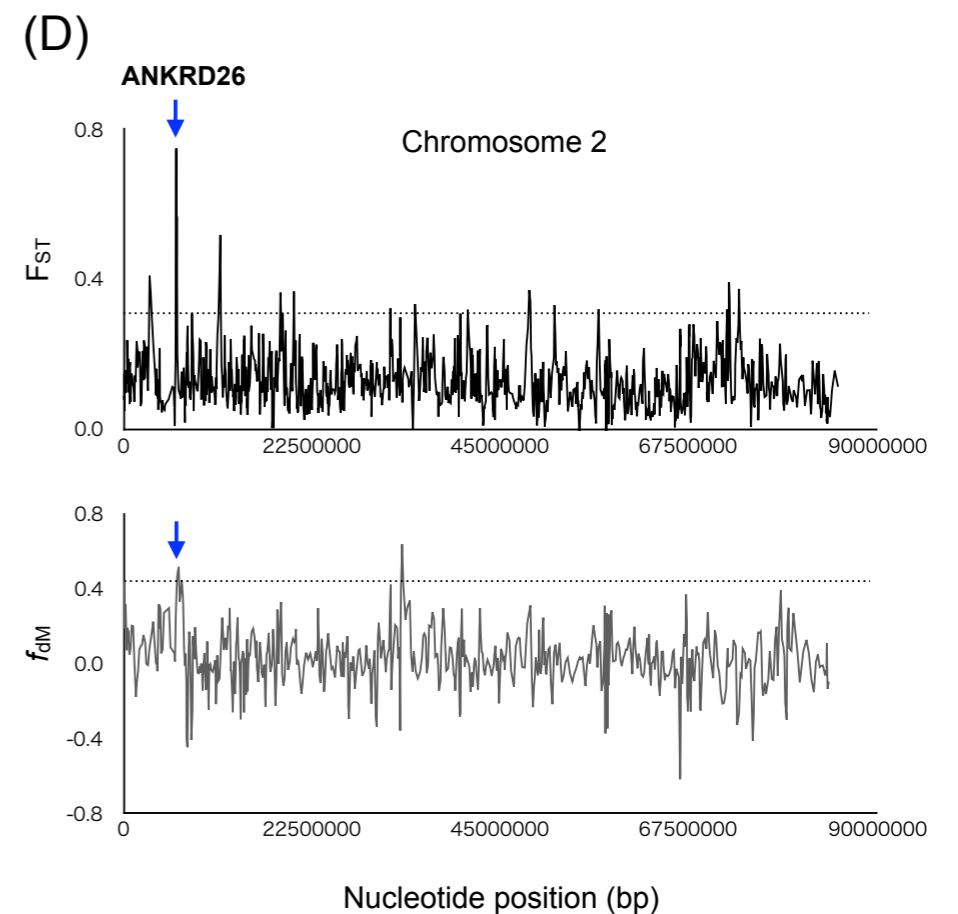

Figure 3 Admixture between Japanese wolves and the other canids.

*f4*-ratio test to estimate proportion of genome introgression from the Japanese wolf to dogs. Each *f4*-ratio  $\alpha$  value is plotted in order of highest to lowest value from the top, and the names of the dogs are shown on the right side of the panel. Error bars represent standard errors. Z score above 3 is colored in blue. (B) TreeMix admixture graph built using LD-pruned data (150,502 sites) on a dataset consisting of 88 dogs/wolves merged into 13 groups according to their phylogenetic relationships. (C) *f3* statistics testing whether dogs share more alleles with dingo/NGSD (x-axis) or Japanese wolf (y-axis). Dots show the *f3* statistics, and horizontal and vertical error bars represent standard errors for tests with the African dogs (x-axis) and dingo/NGSD (y-axis), respectively. Each of the Japanese wolves and dingo/NGSD individuals were used as populations. (D) Sliding window analyses of the  $F_{ST}$  values (y-axis: upper panel) and  $f_{dM}$  (y-axis: lower panel) in windows of 50 SNPs using a 25 SNPs slide across chromosome (x-axis). Dashed lines show the 99th percentiles. Blue arrow indicates overlapping regions above 99th percentiles between upper and lower panels. The gene name above the arrow is the gene in the overlapped region.



**Jw229**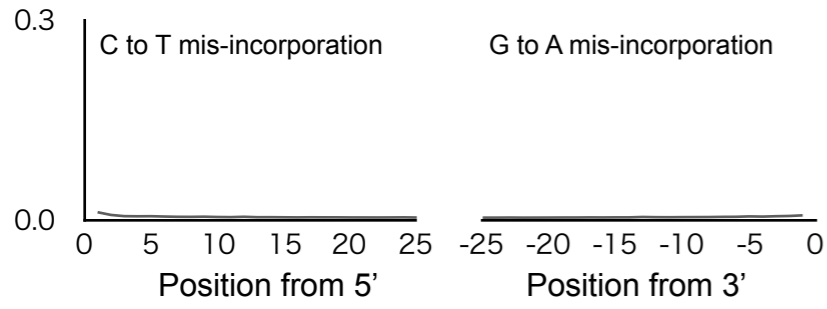**Jw269**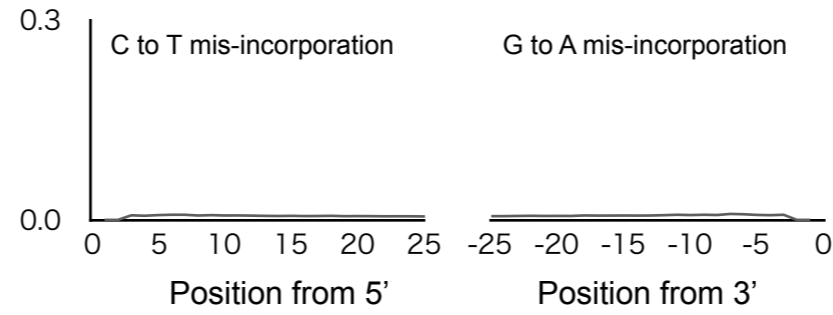**Jw284**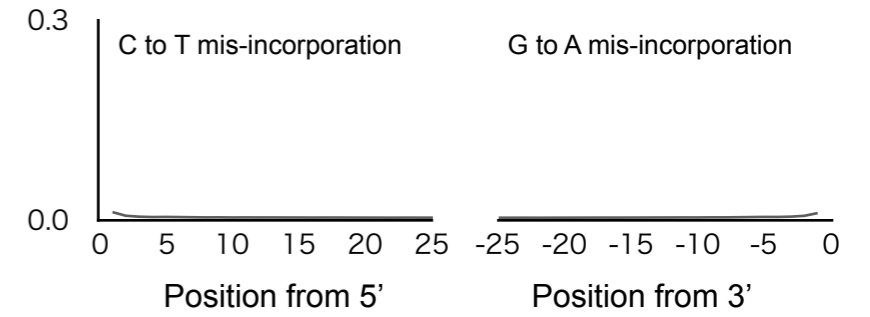**Jw255**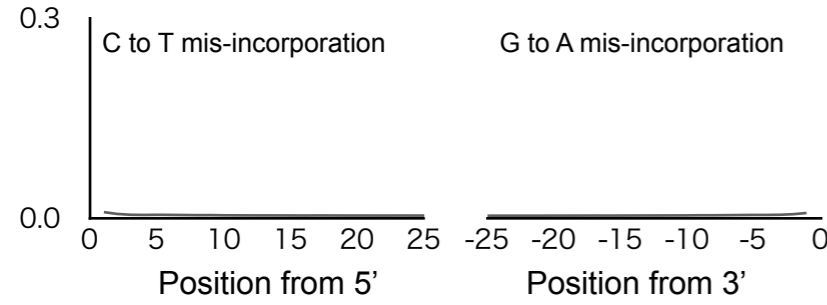**Jw271**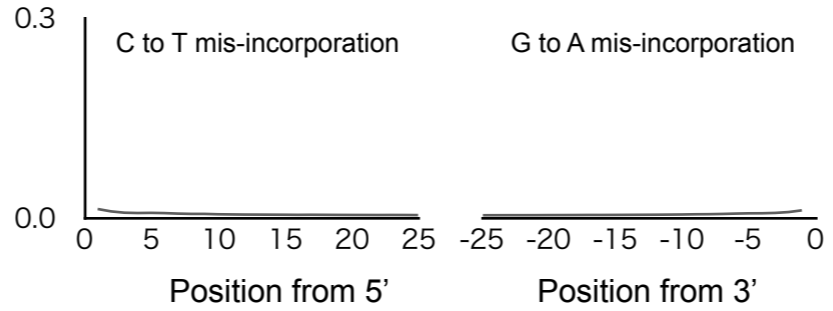**Leiden b**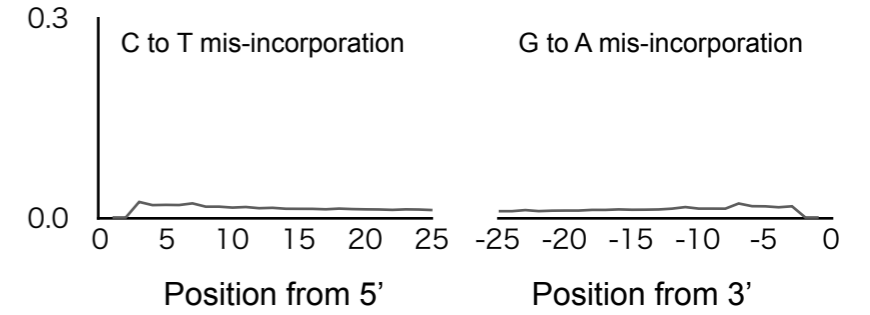**Jw258**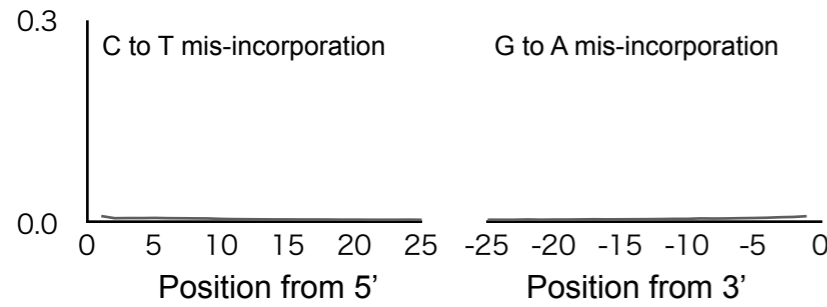**Jw275**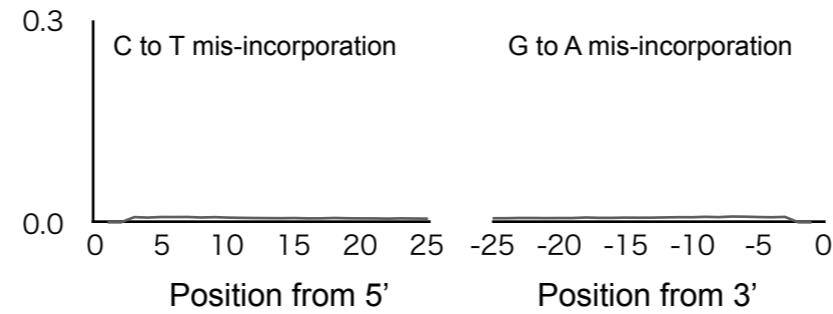**Leiden c**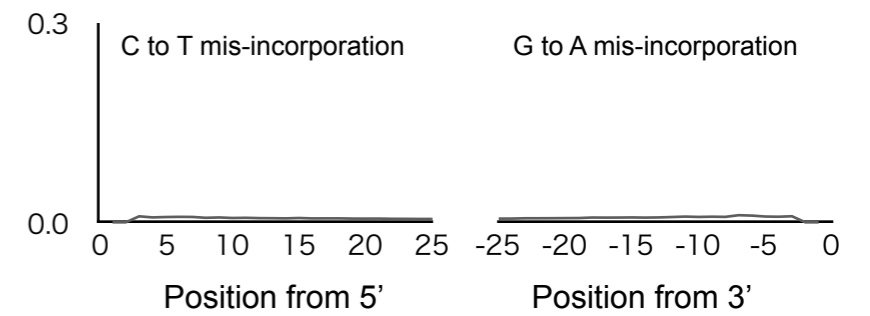

Figure S1

C to T and G to A frequency of mis-incorporation at 3' and 5' end of reads determined in this study.

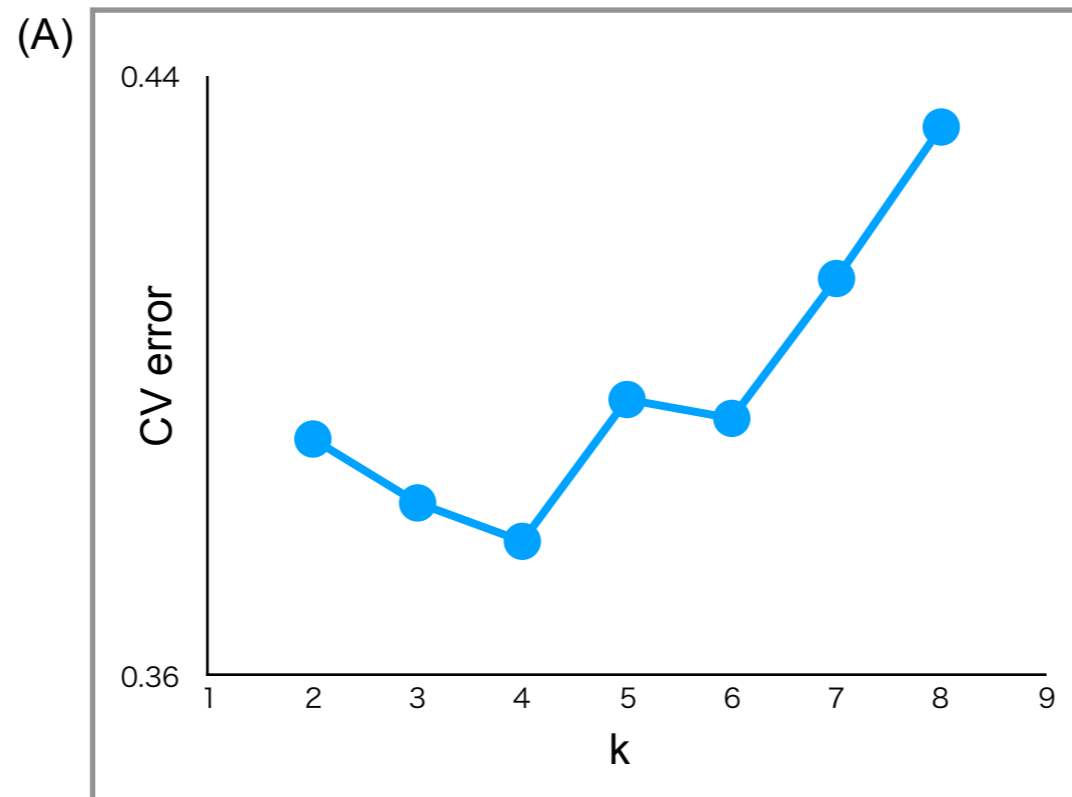

Figure S2

(A) Cross validation (CV) values for ADMIXTURE analysis of SNP data.

(B) ADMIXTURE results based on SNP data for K = 2-6 (see Table S2 for sample information).

(B)

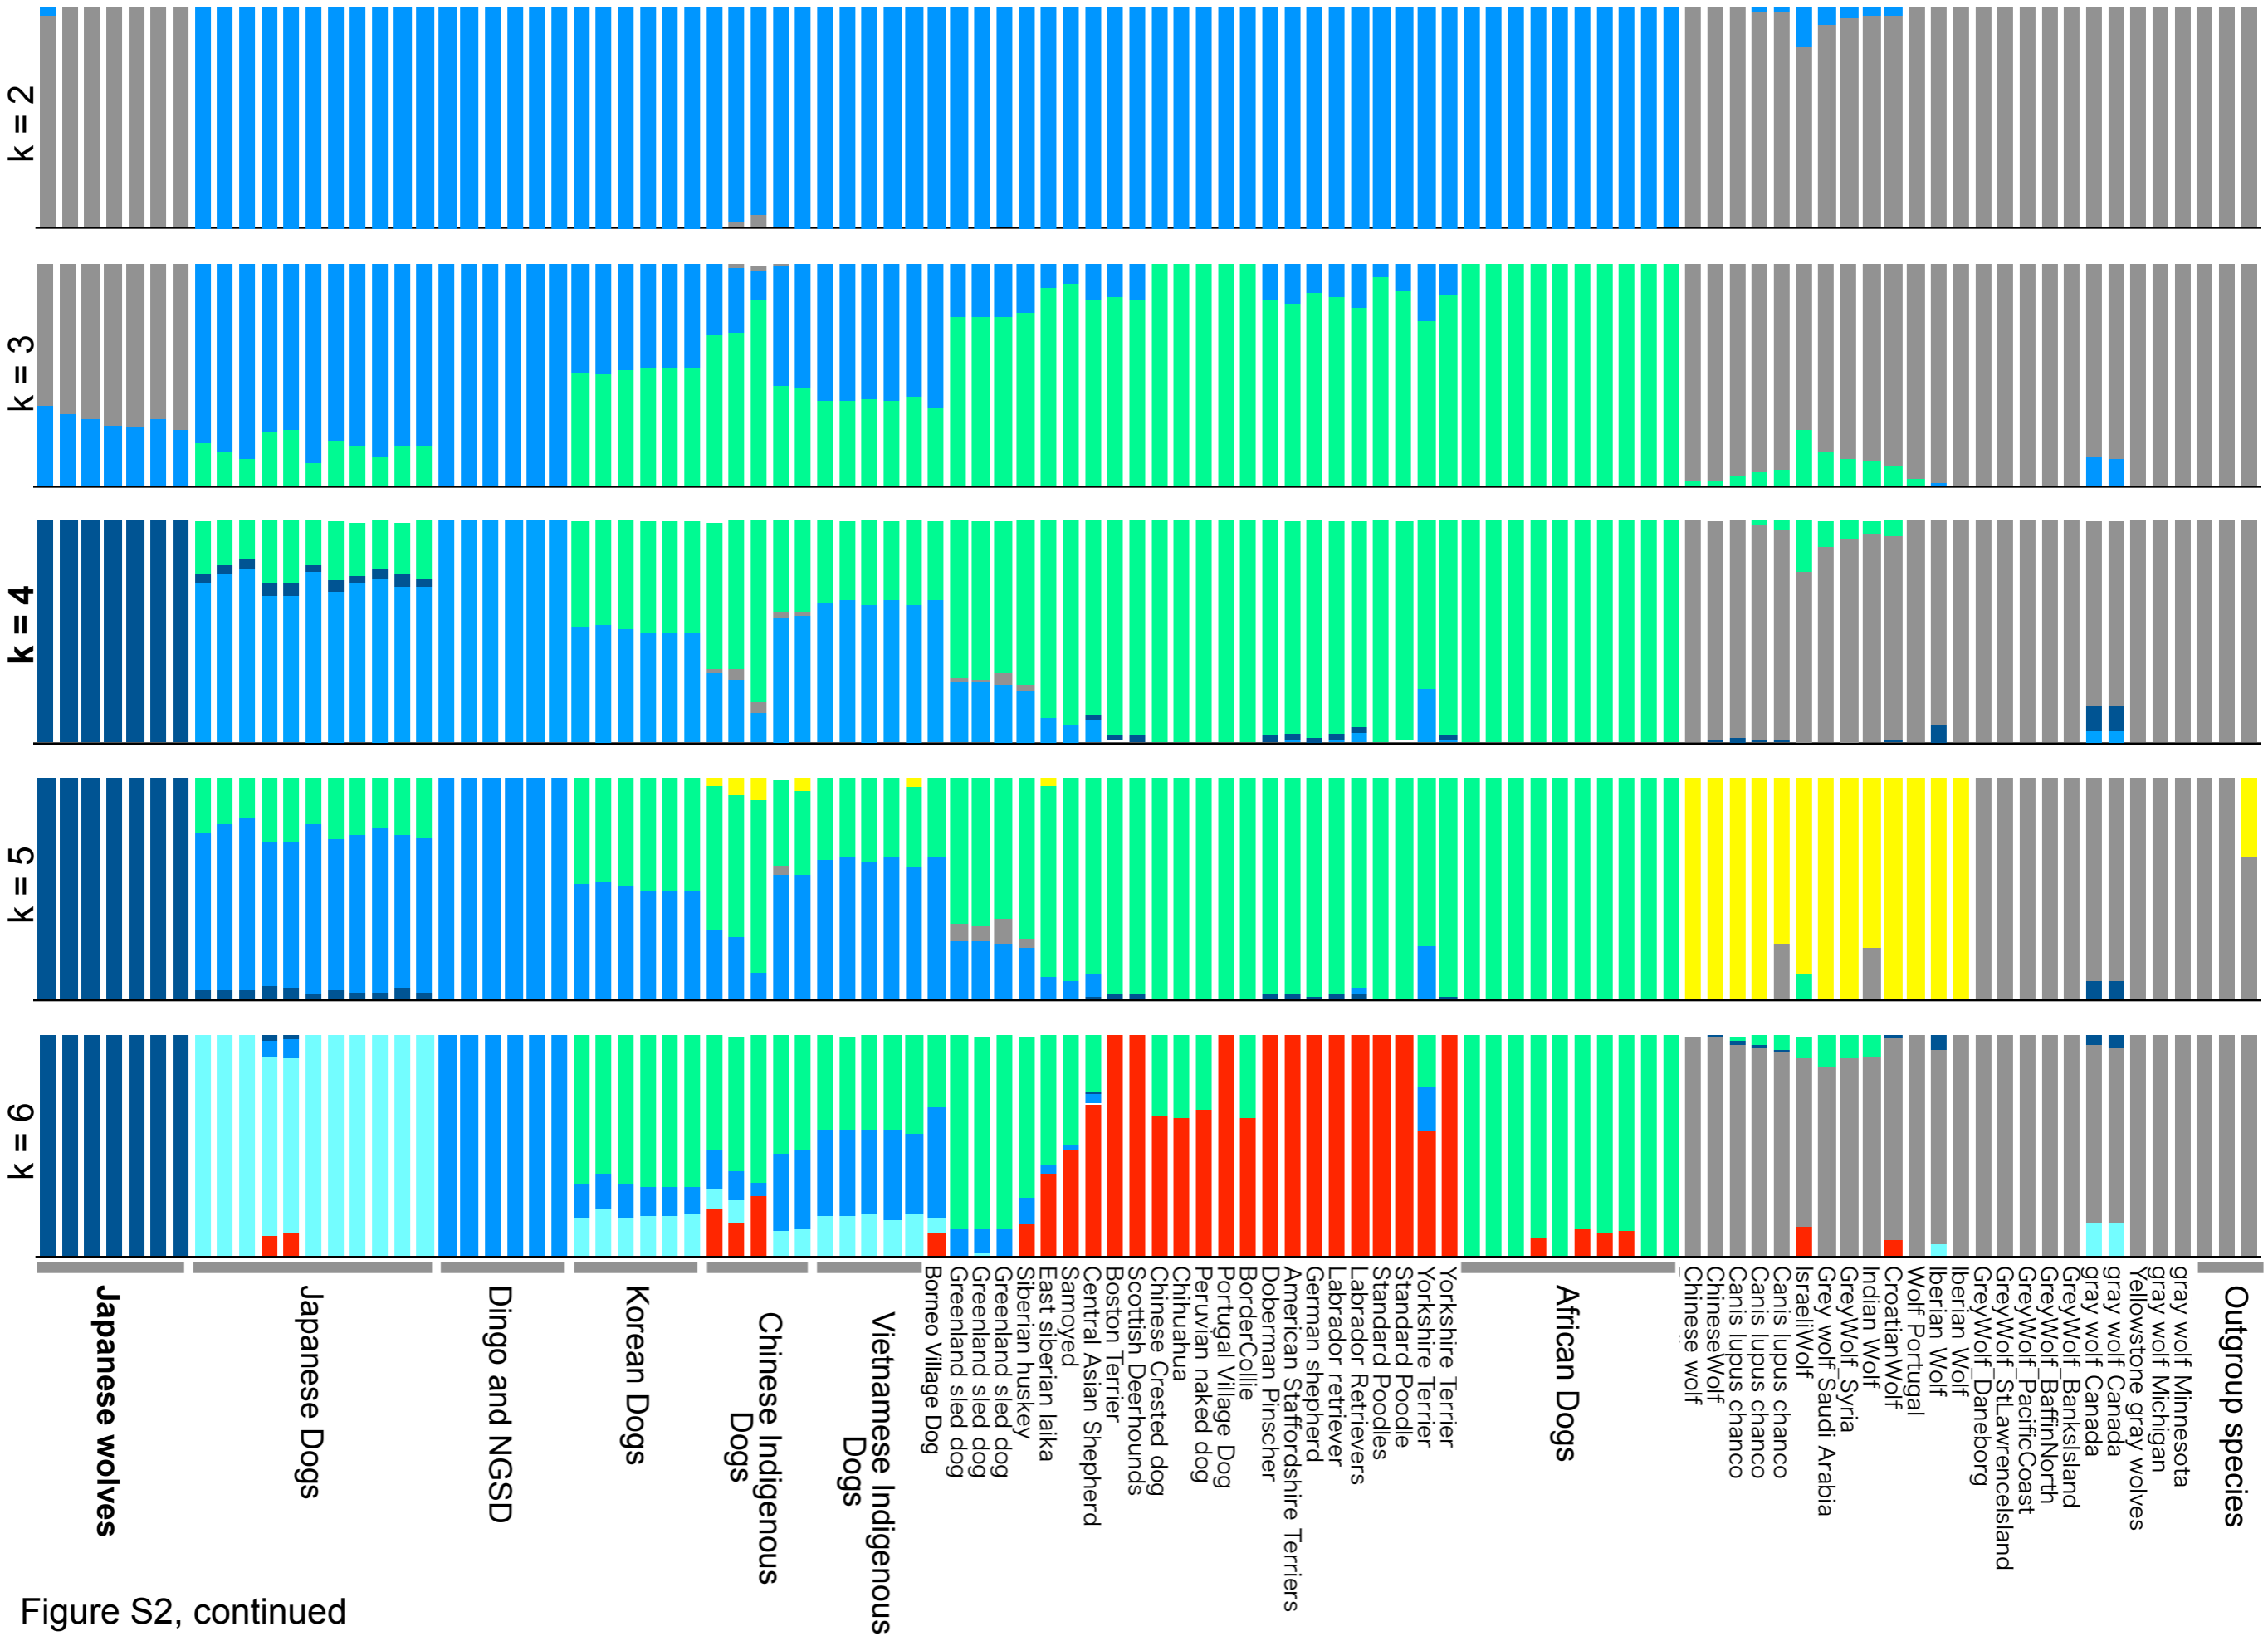

Figure S2, continued

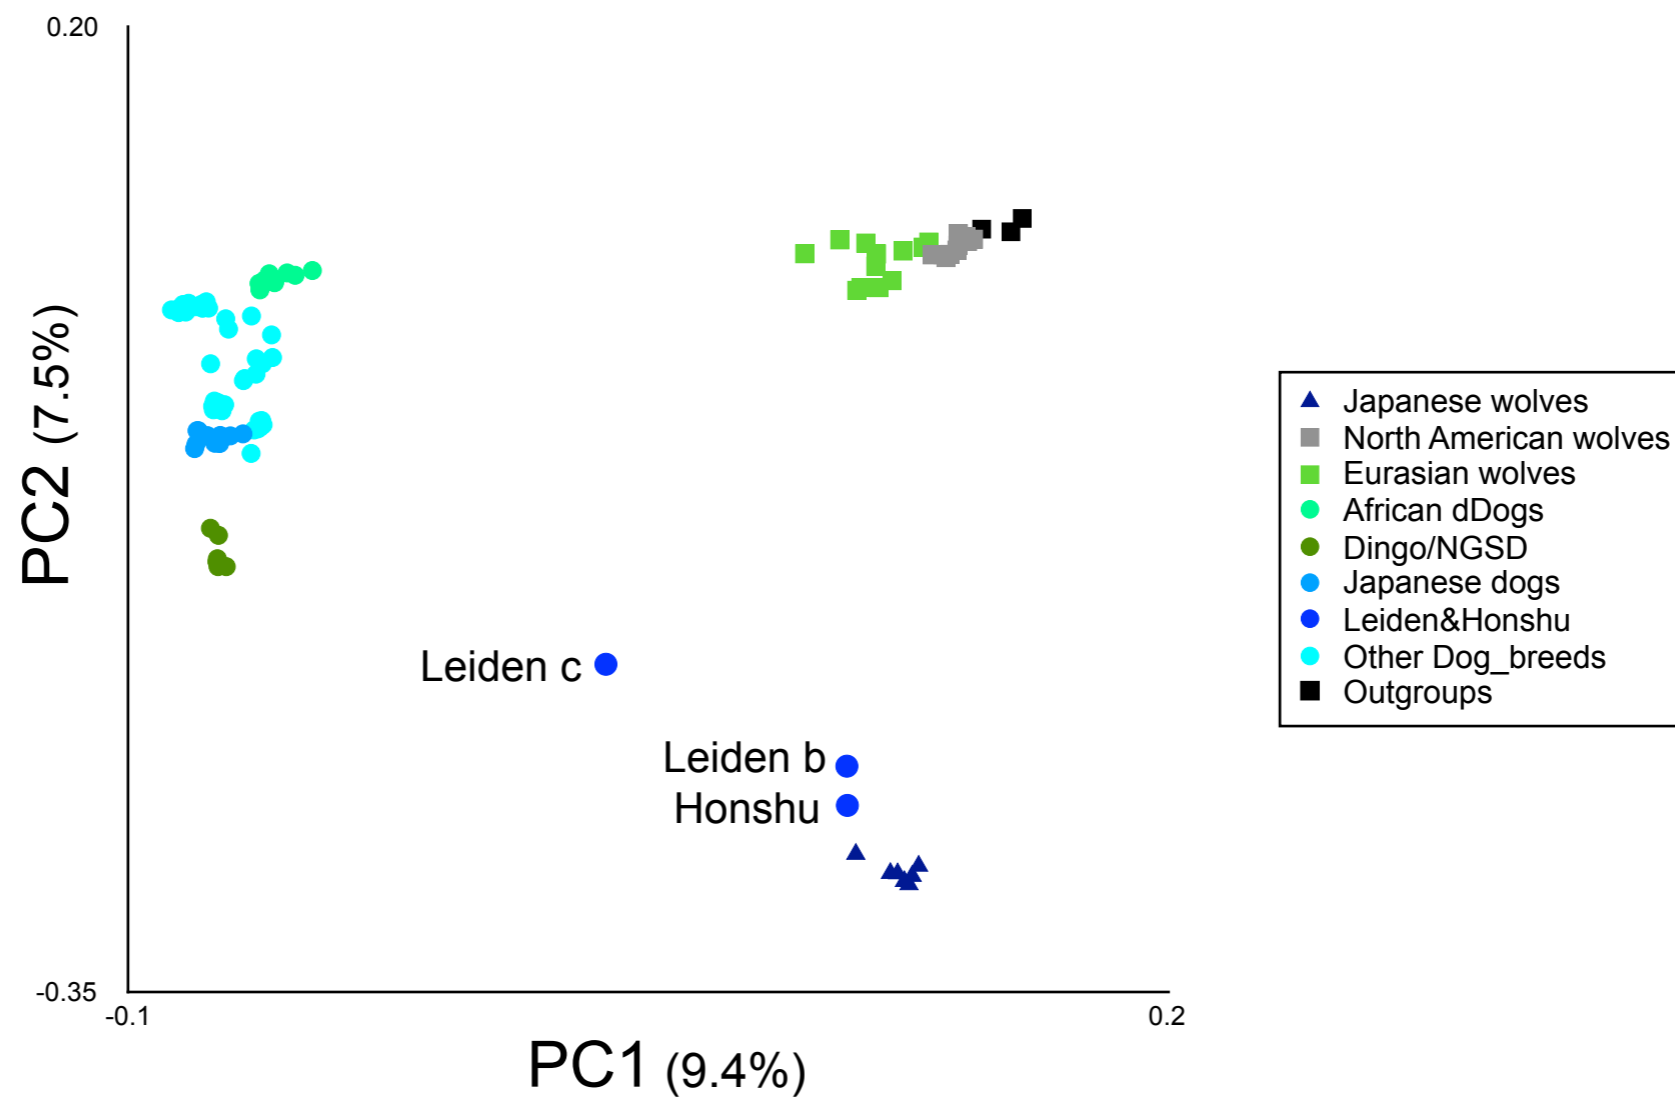

Figure S3

Principal Components Analysis (PC1 versus PC2) of 103 samples based on 103,432 SNPs (see Table S2 for sample information). Colored circle, square, and triangle correspond to the names of dogs or wolves in the panel.

k = 4

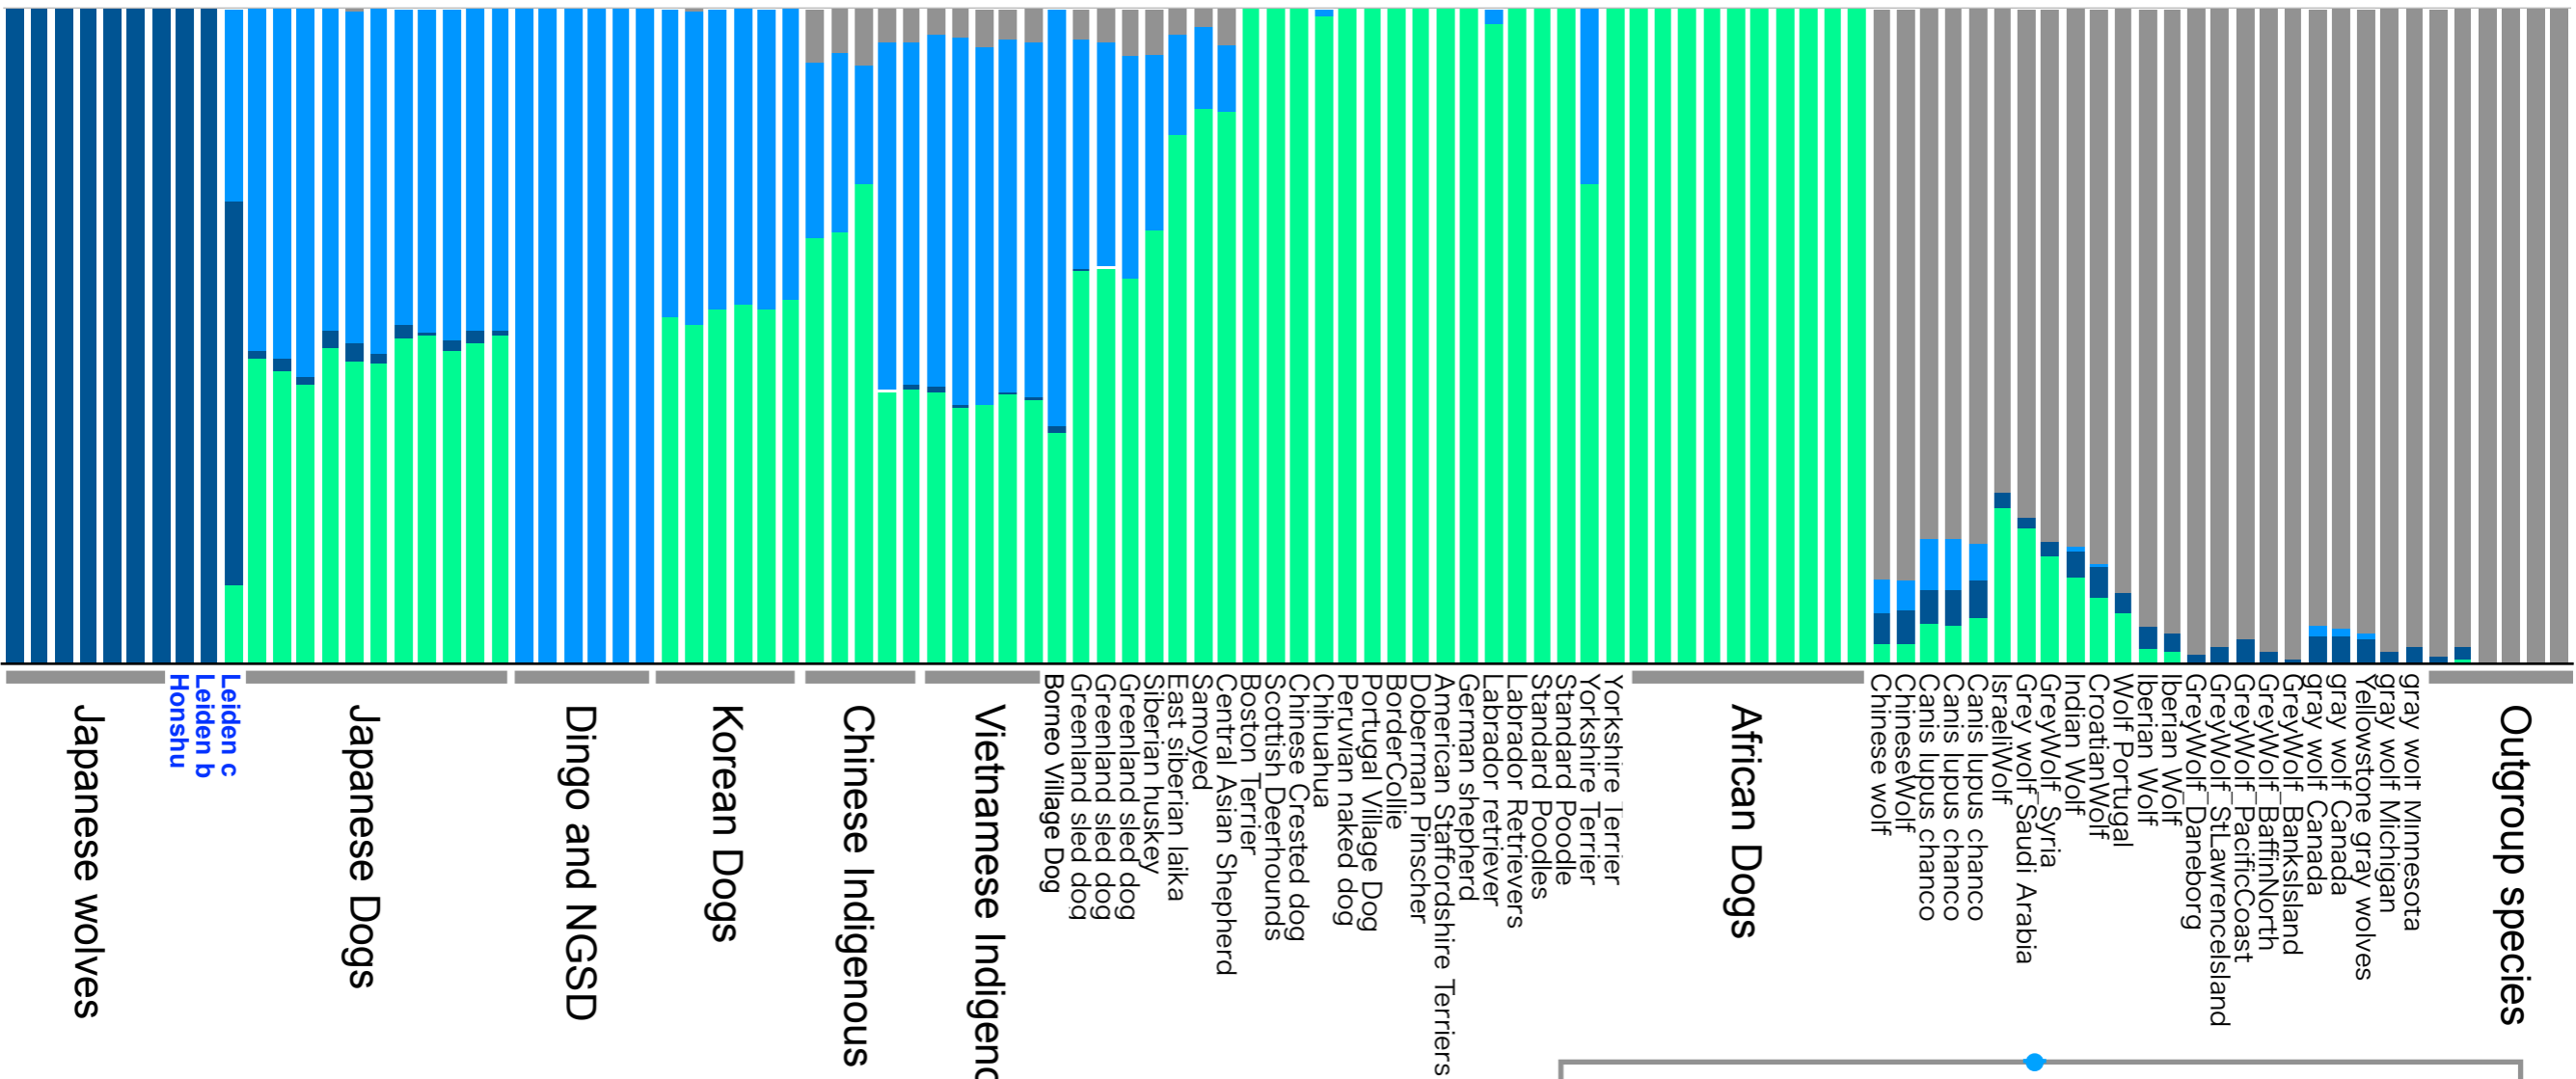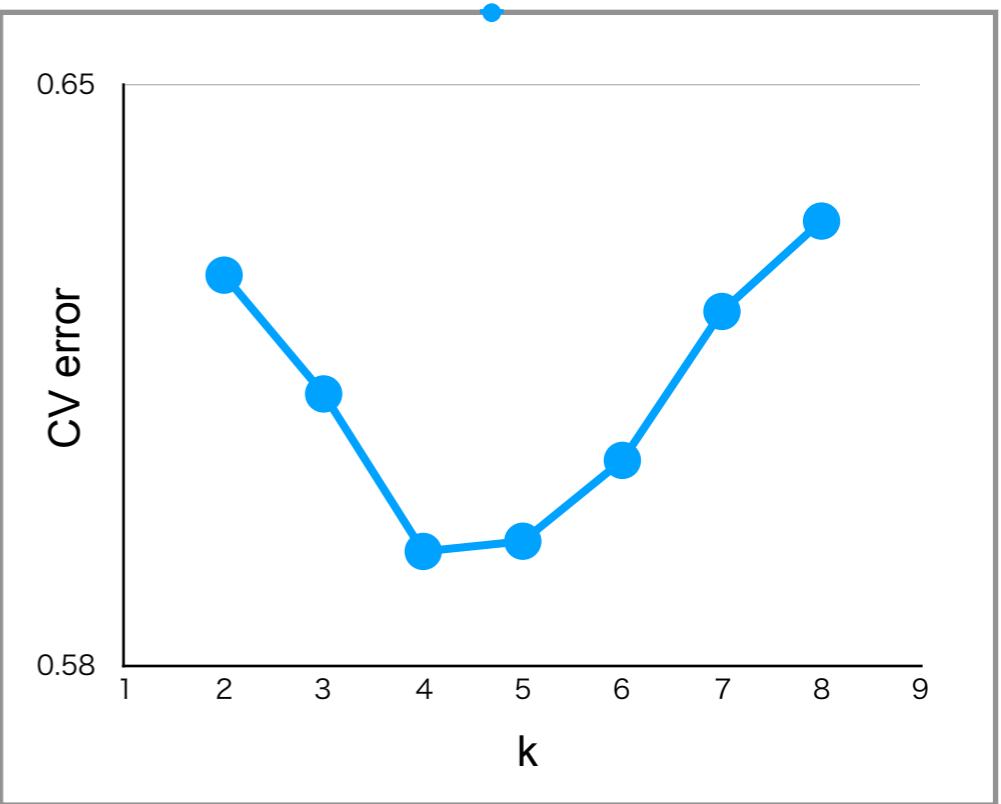

Figure S4  
An ADMIXTURE result based on SNP data for K = 4 (see Table S2 for sample information). Cross validation (CV) values for ADMIXTURE analysis of SNP data is shown in the panel.

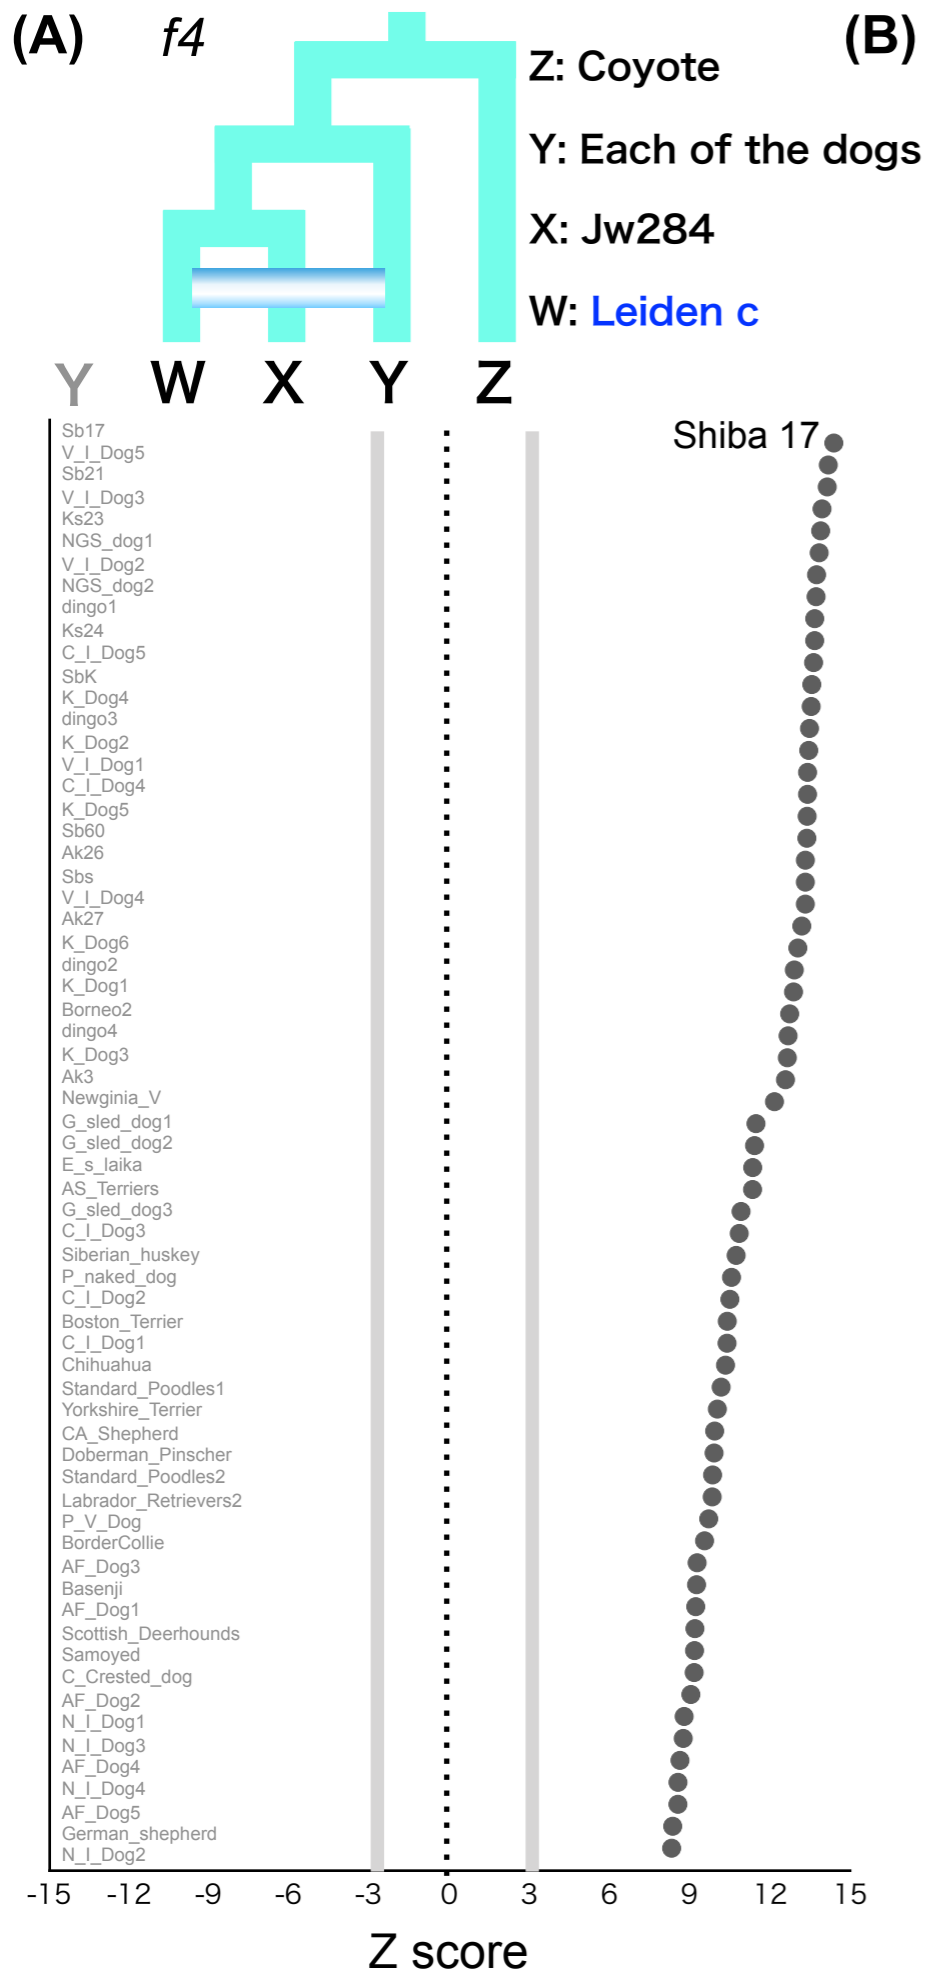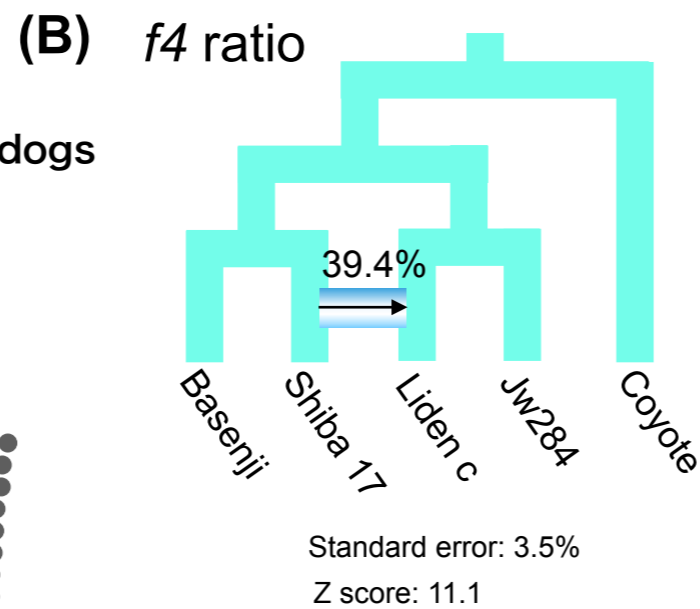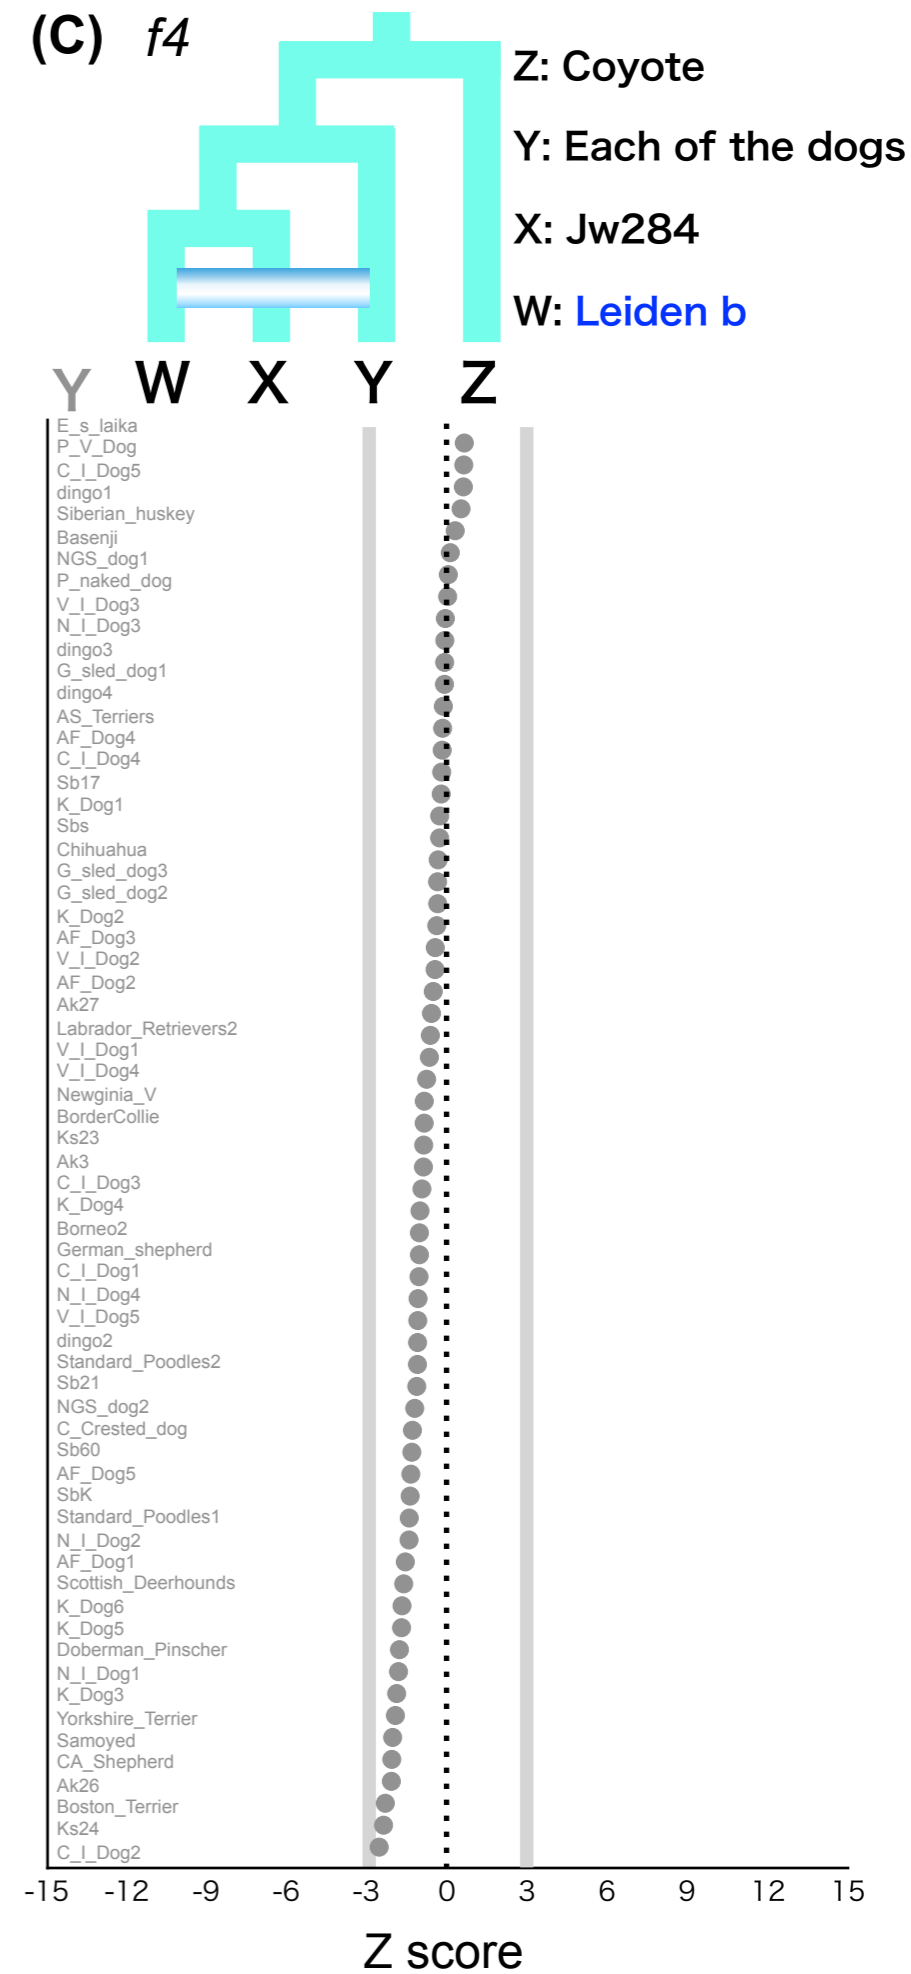

**Figure S5**  
(A) *f4*-statistics testing the relationships between the Japanese wolf (Jw284), Leiden c, and all other dogs. Each Z score is plotted in order of highest to lowest value from the top, and the names of dogs are shown on the left side of each panel. Gray lines show the Z score -3 and 3. Leiden c shows genetic affinity with all other dogs (Z score > 3). (B) *f4*-ratio test to estimate proportion of genome introgression from a Japanese dog (Shiba 17) to Leiden C. (C) *f4*-statistics testing the relationships between the Japanese wolf (Jw284), Leiden b, and all other dogs. The genetic affinities of Leiden b with all other dogs are rejected (-3 < Z score < 3).

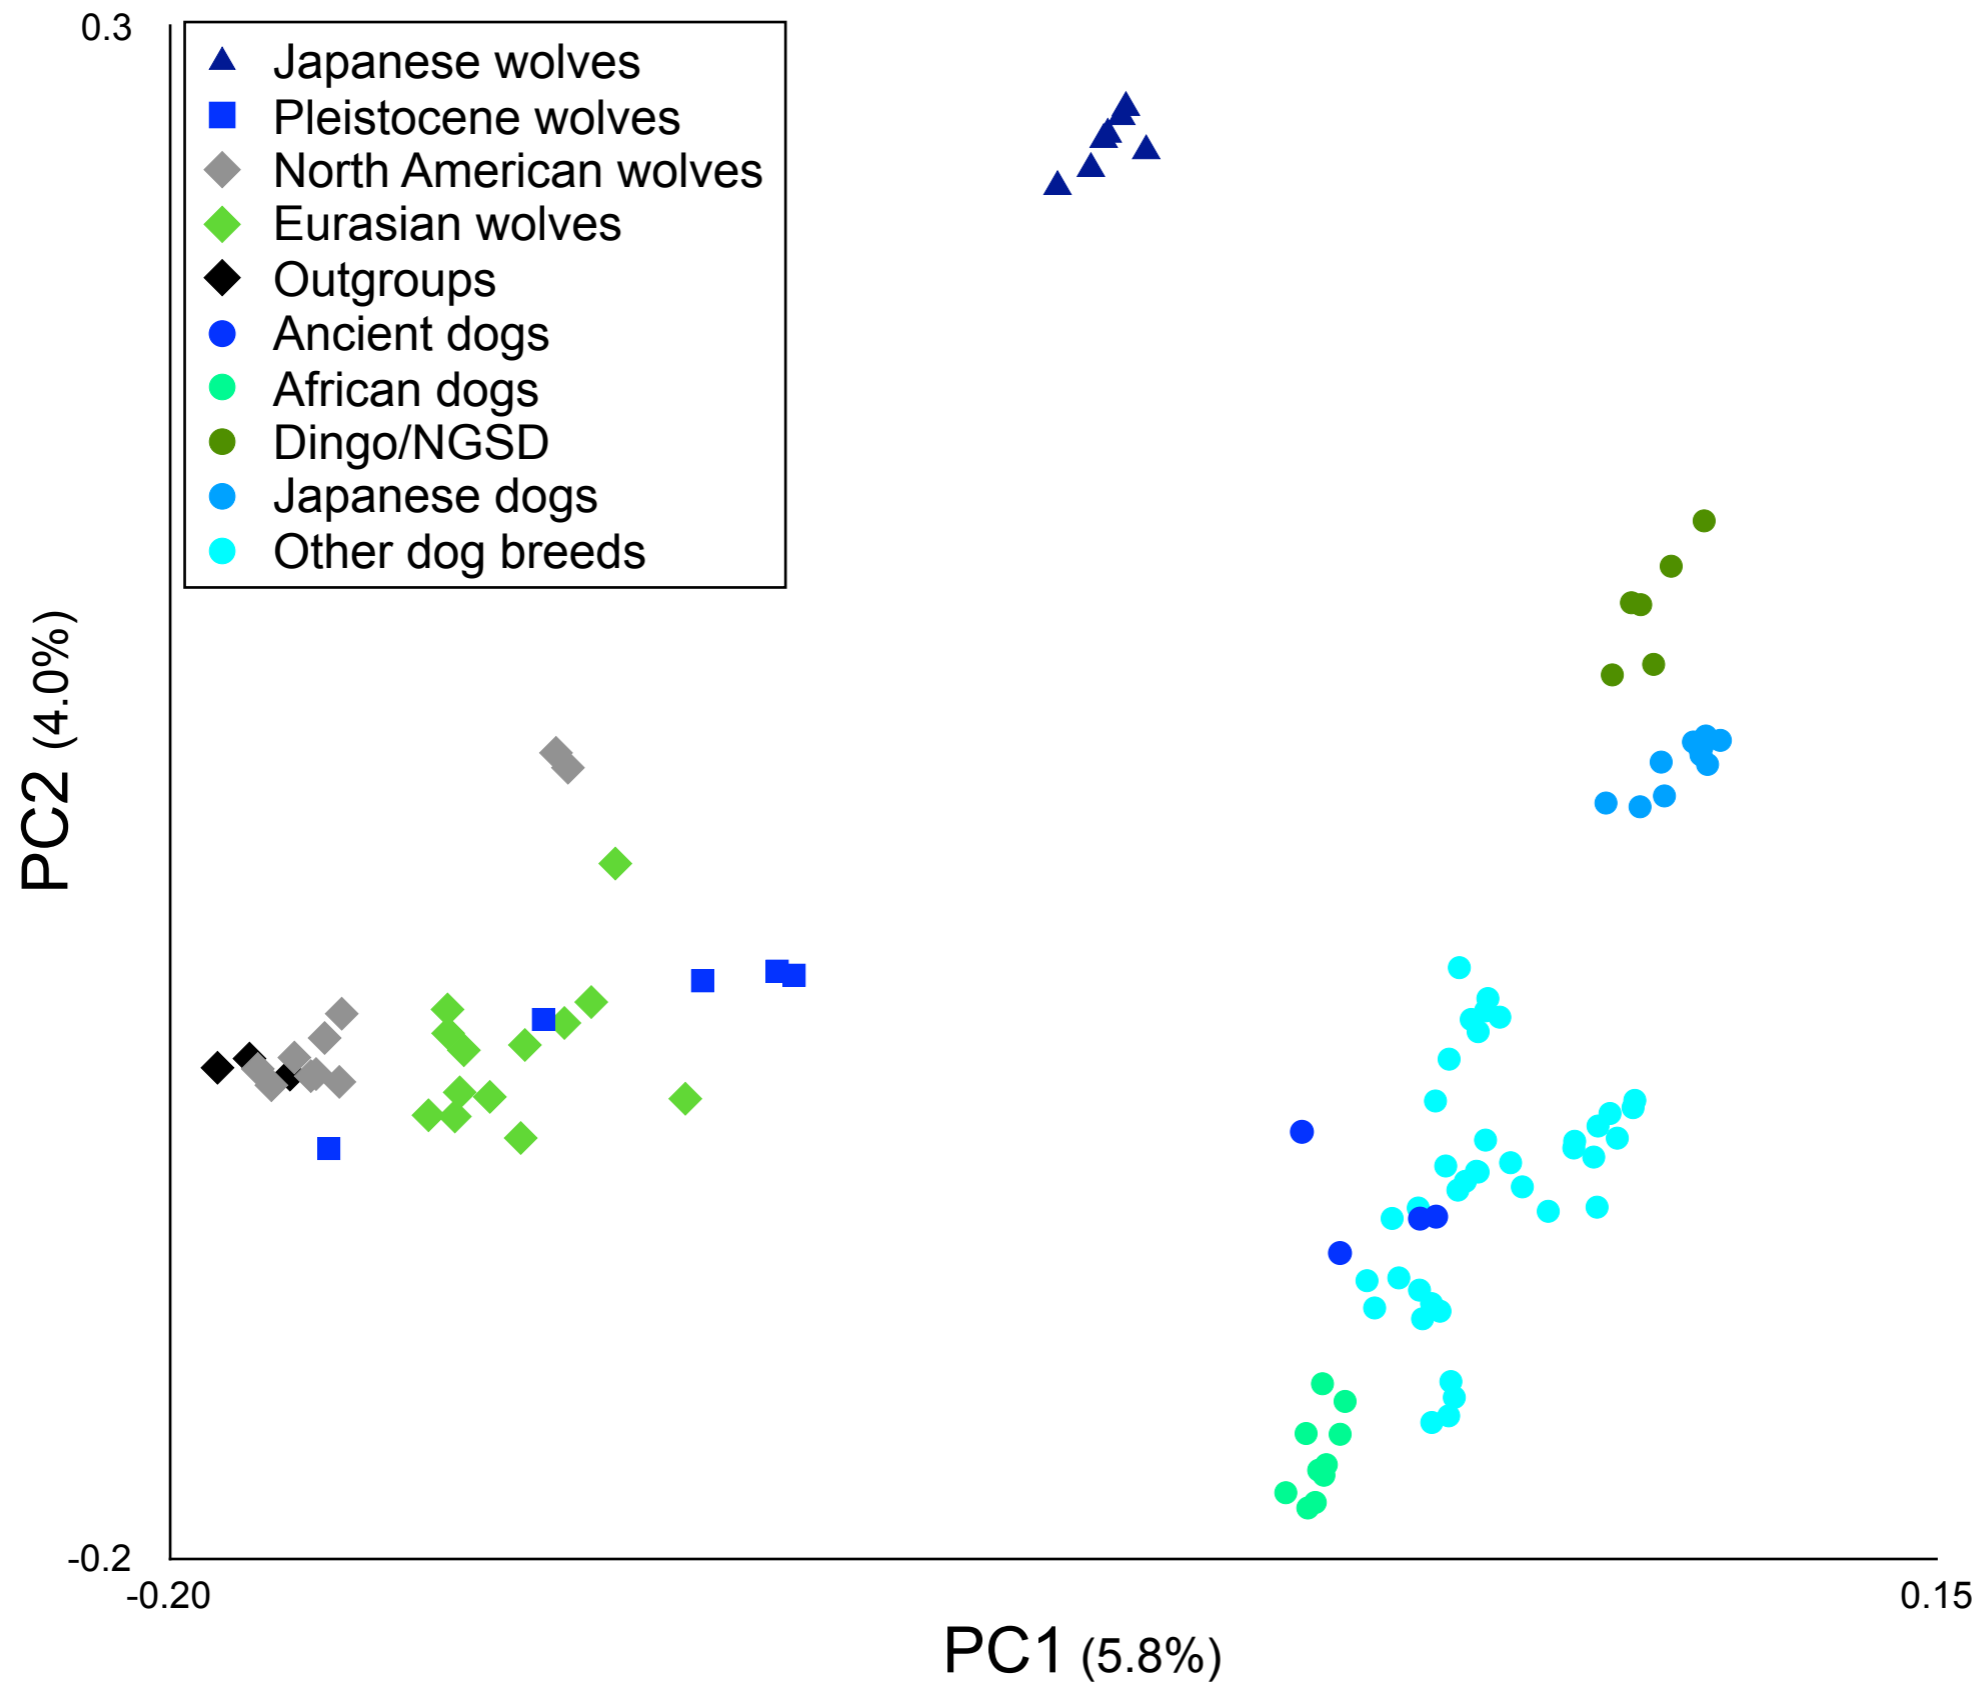

Figure S6  
 Principal Components Analysis (PC1 versus PC2) of 109 samples based on 100,588 SNPs (transversion sites, see Table S2 for sample information). Colored circle, square, and triangle correspond to the names of dogs or wolves in the panel.

Figure S7  
 Maximum likelihood tree  
 based on 489,524 SNPs.  
 Node labels indicate  
 bootstrap replicates.

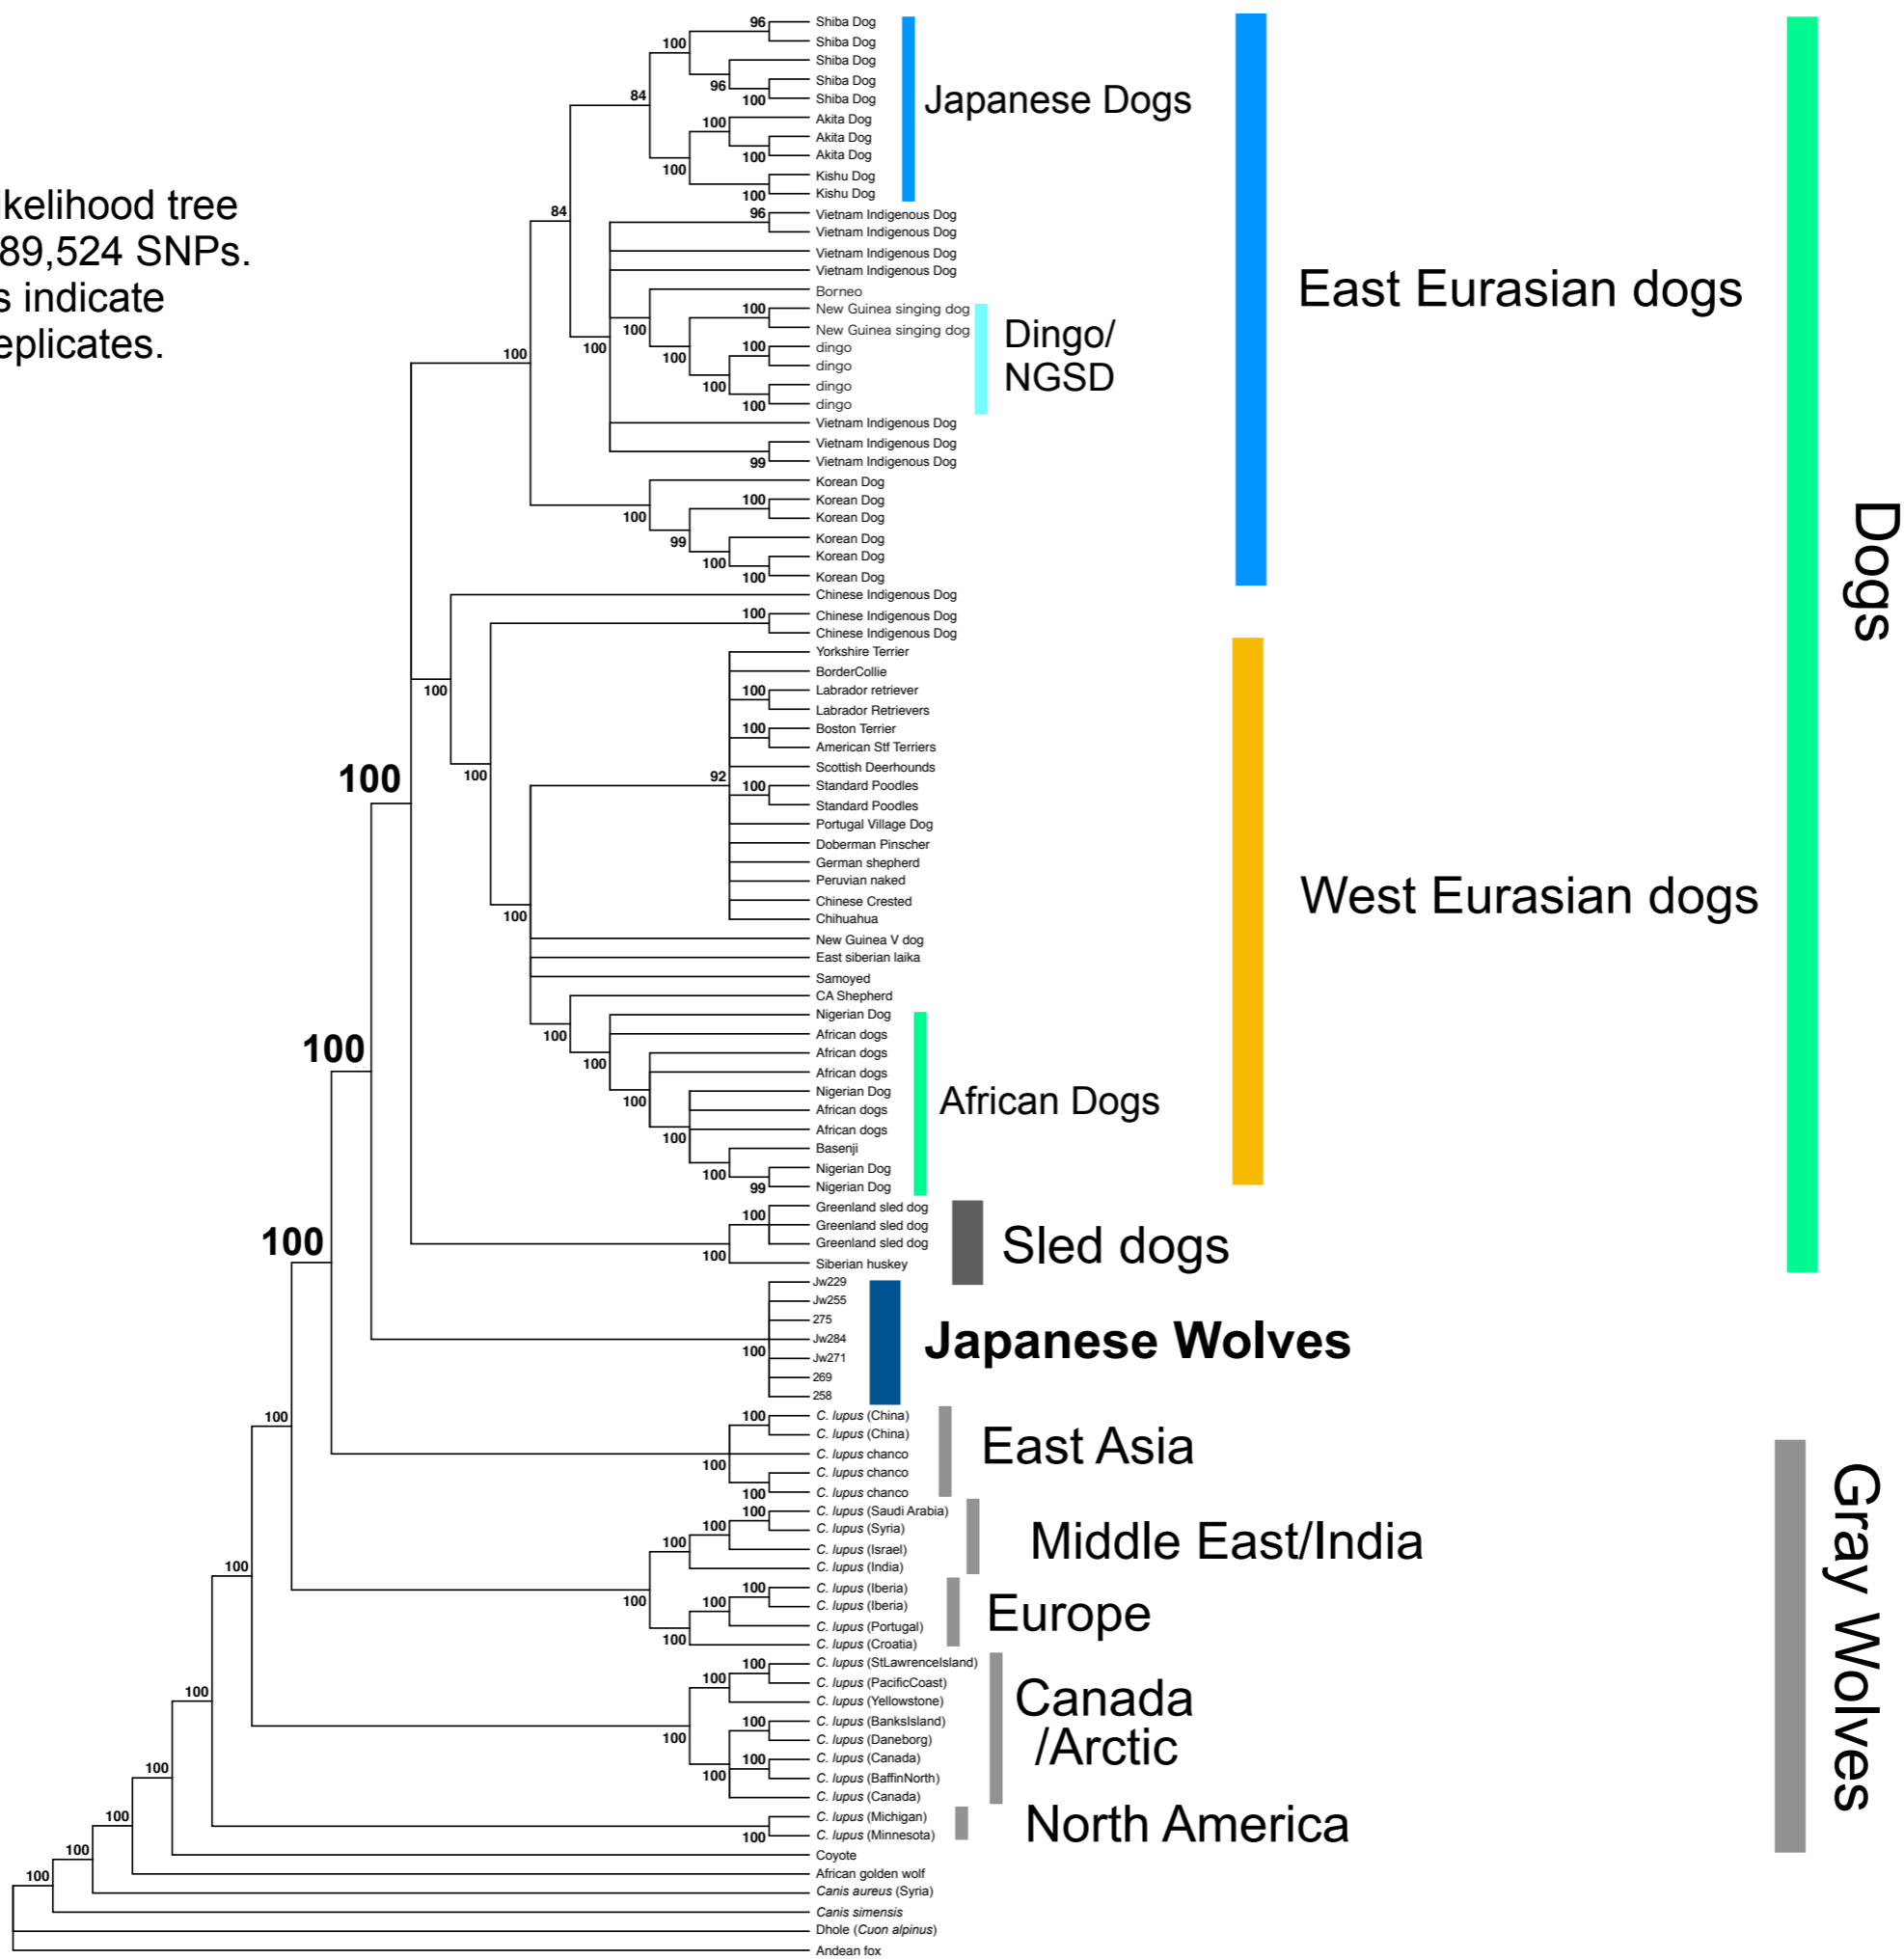



Figure S8  
 Phylogenetic tree constructed  
 by SVDquartets based on  
 489,524 SNPs. Node labels  
 indicate bootstrap replicates.

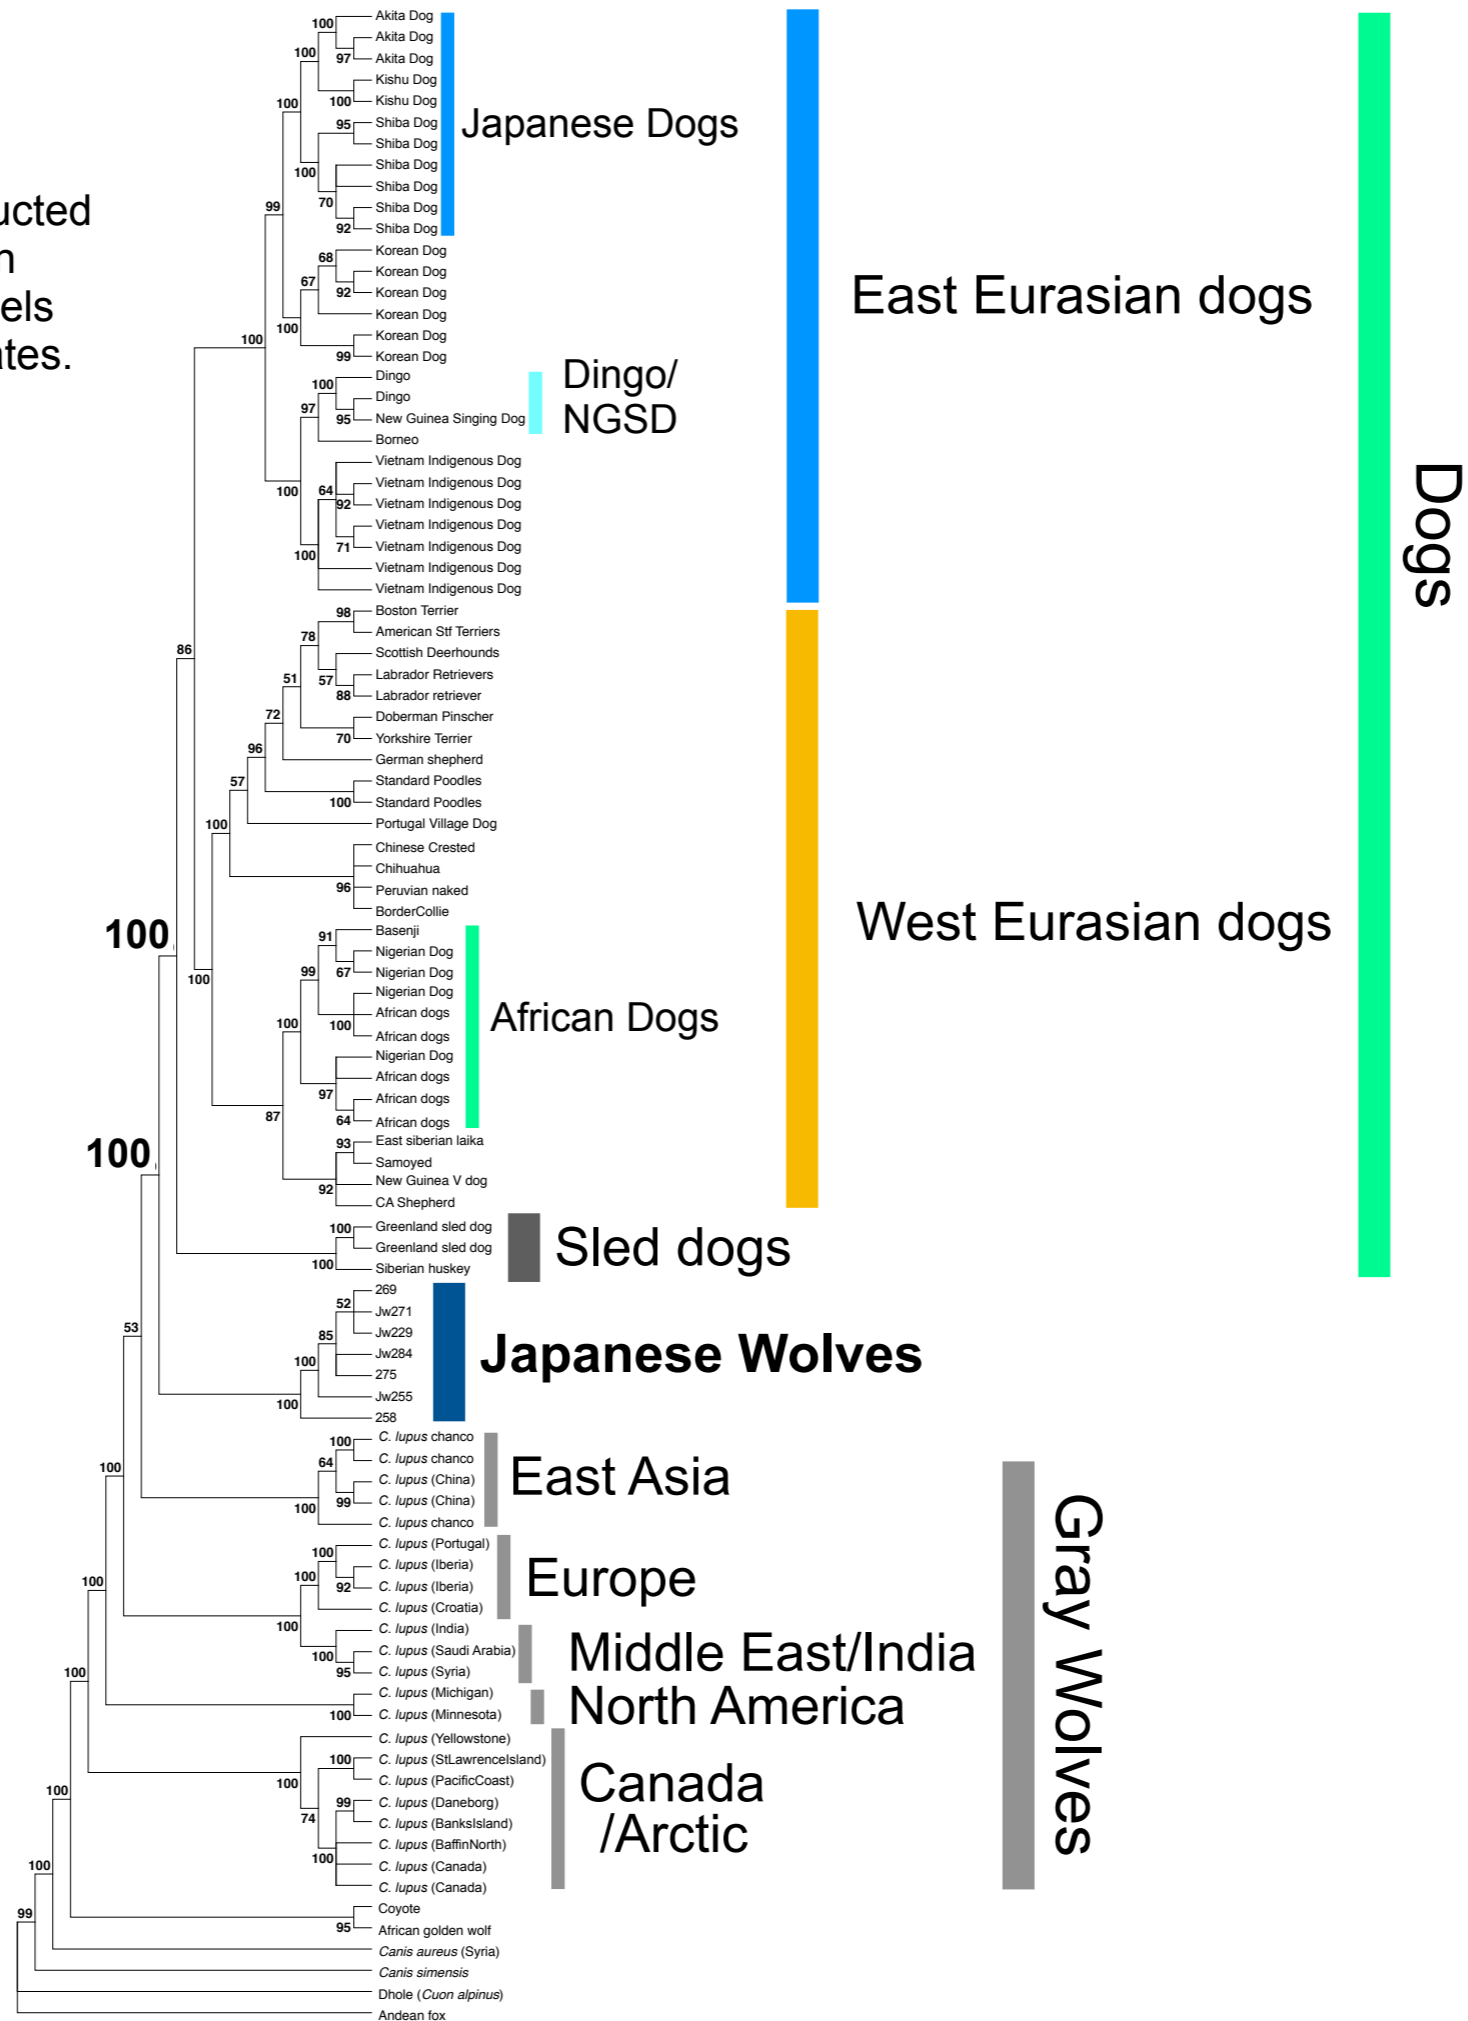

Figure S9  
 NJ tree based on IBS matrix  
 from 1,992,260 SNPs.

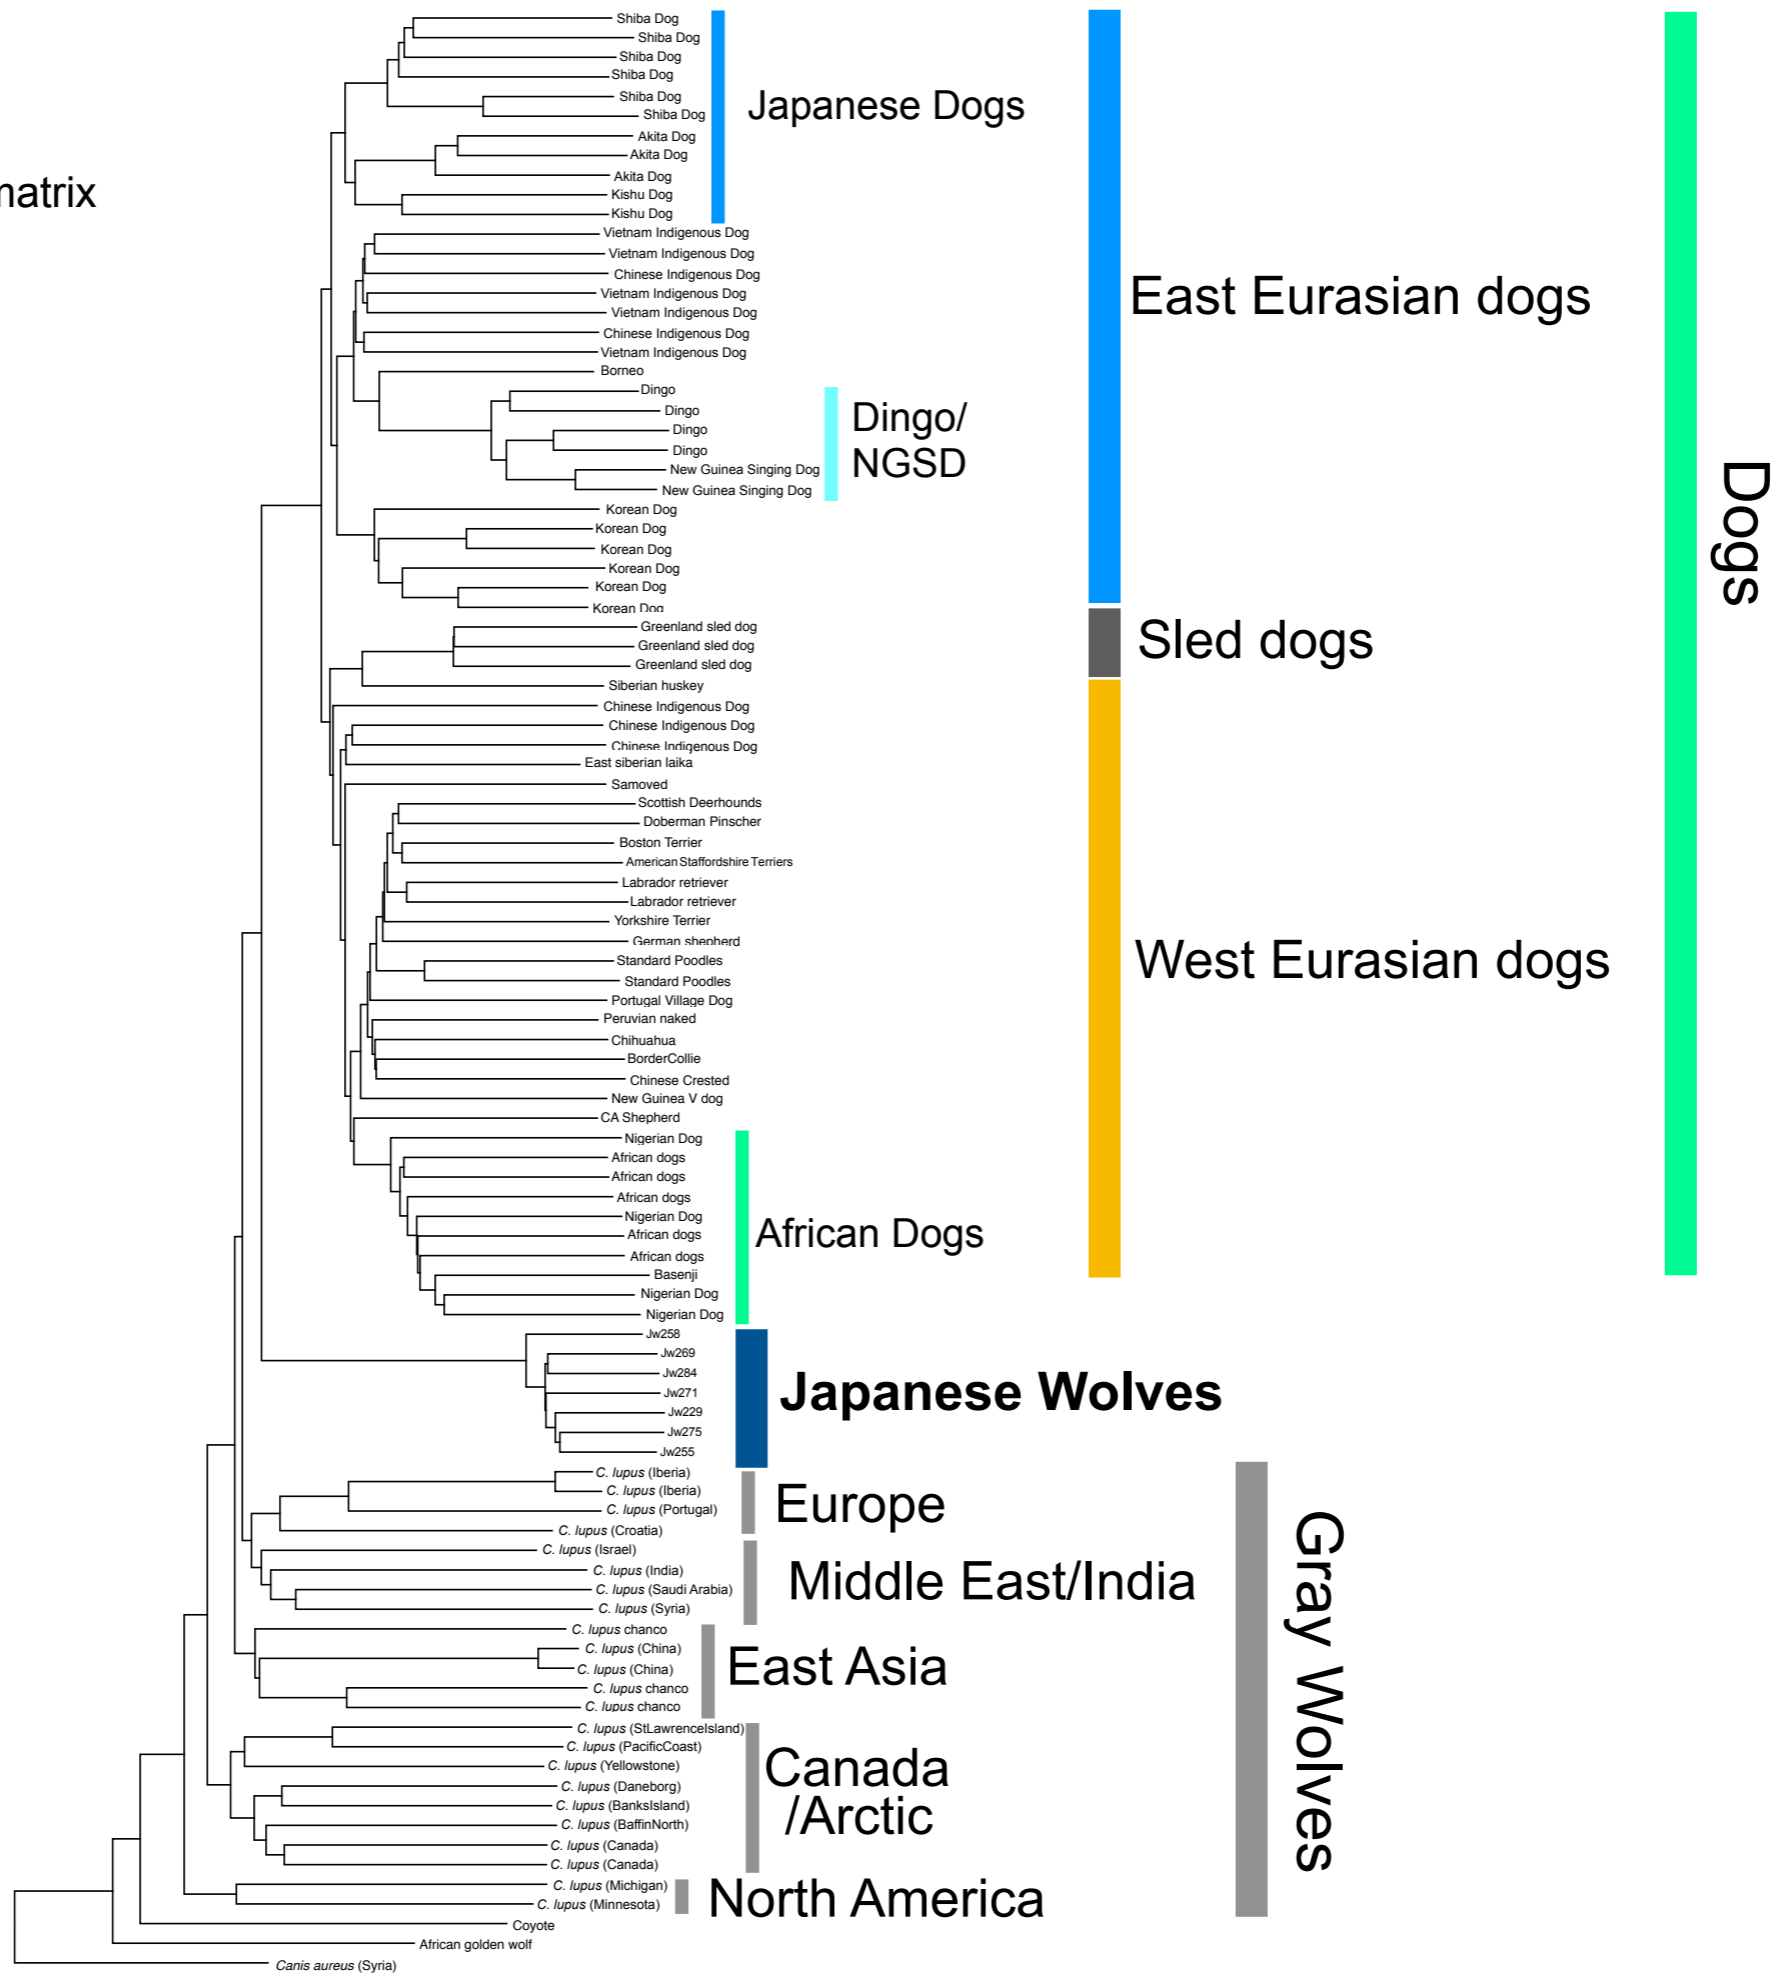

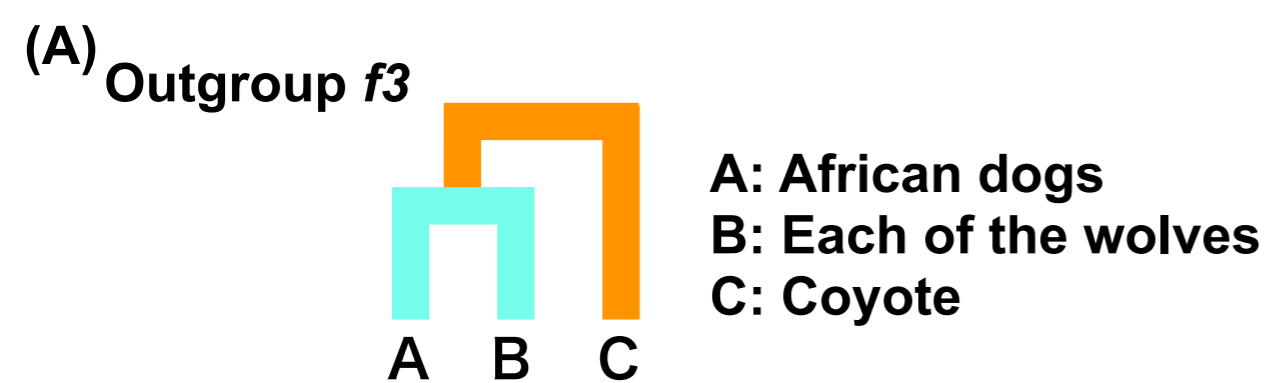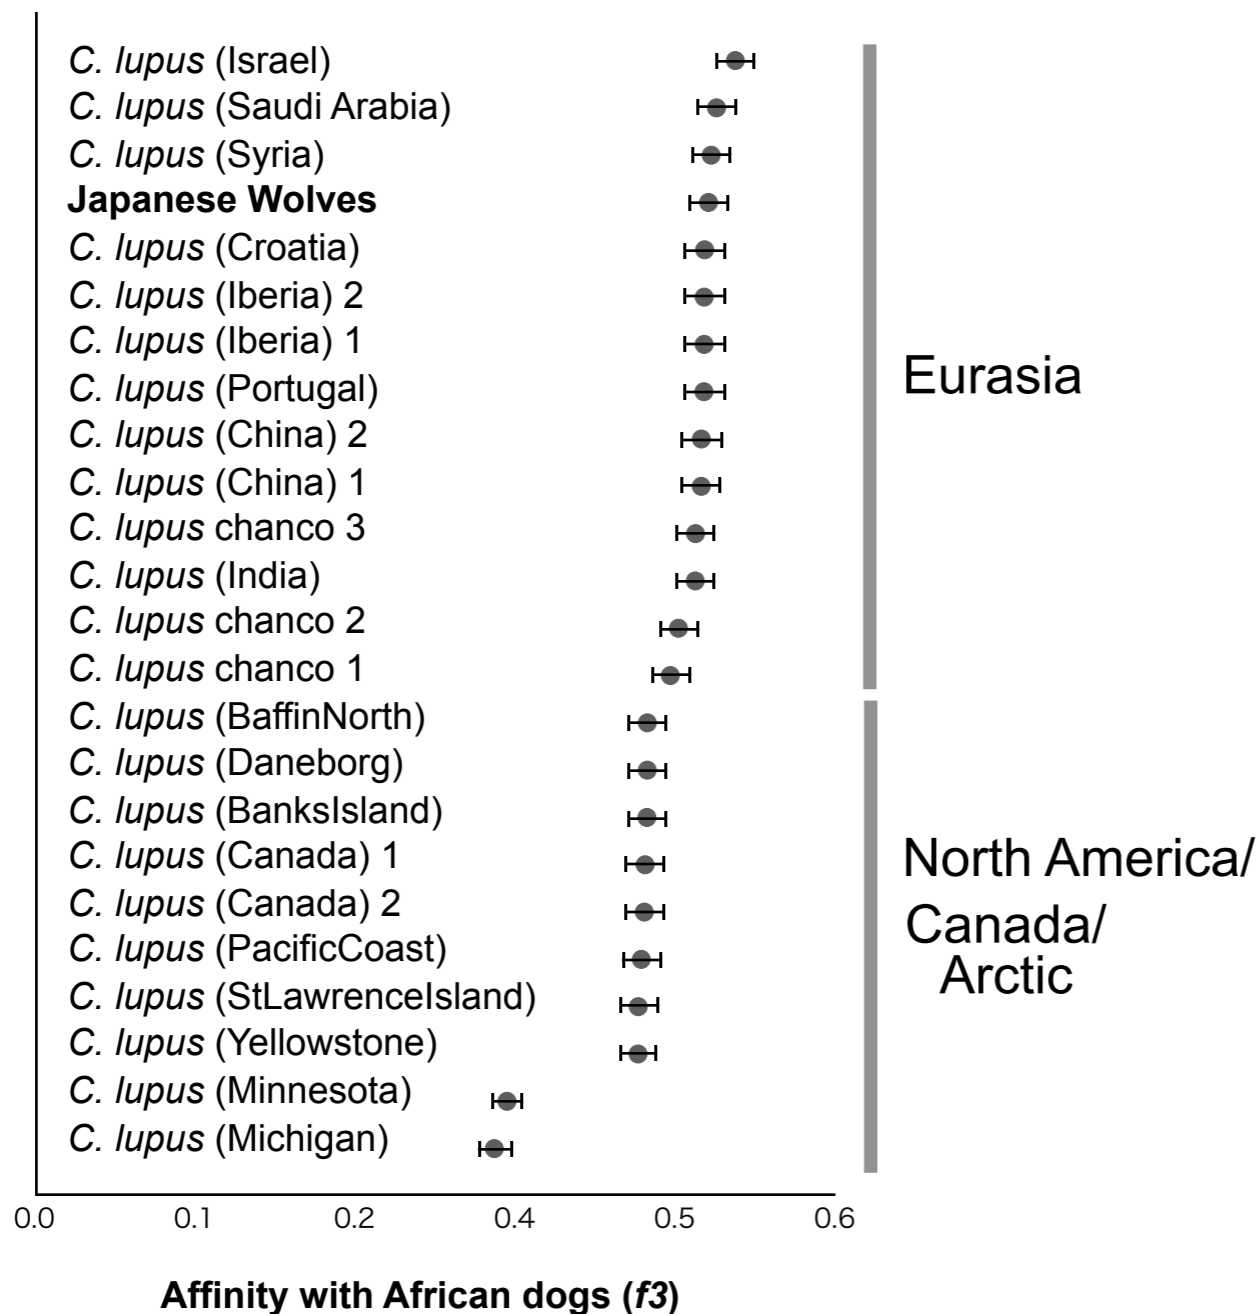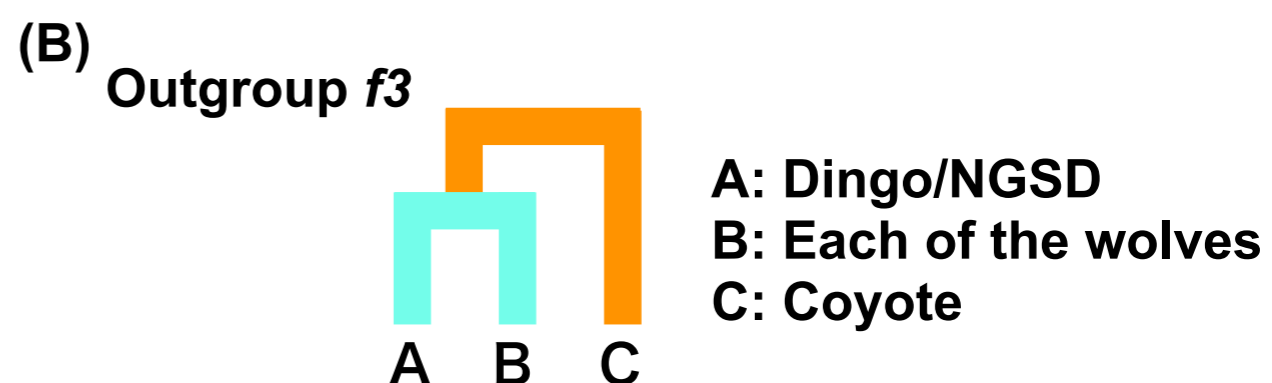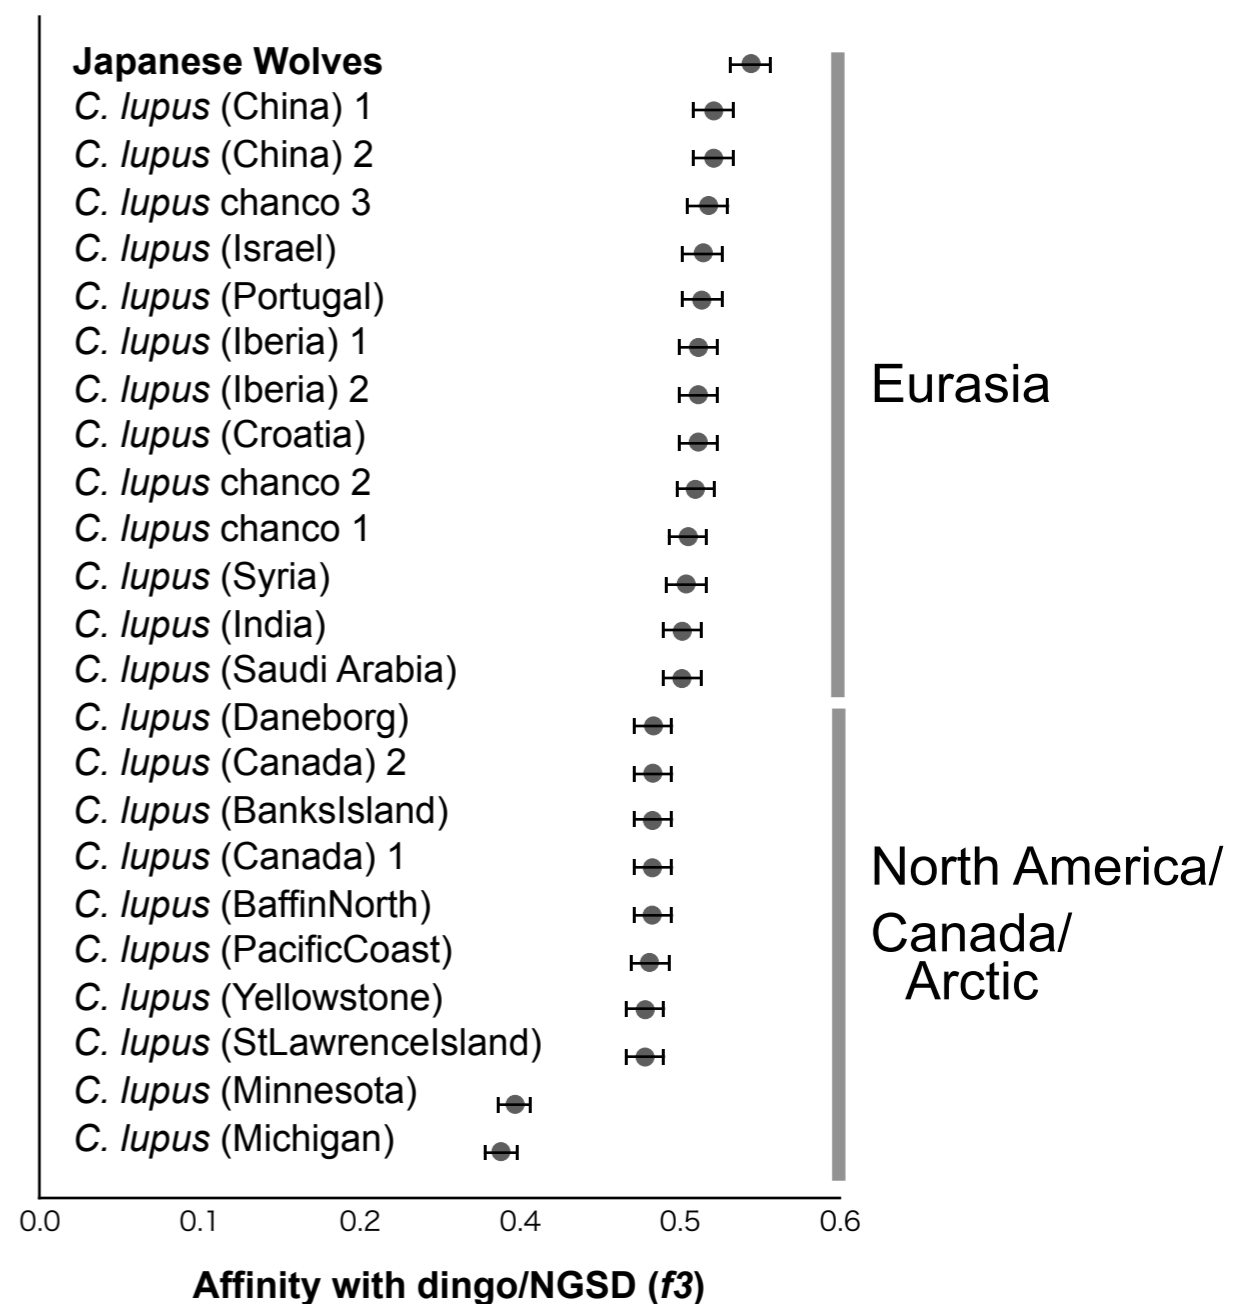

Figure S10

Shared genetic drift between African dogs (A) and Dingo/NGSD (B) and gray wolves measured by outgroup  $f_3$  statistics. Each of the African dogs and Dingo/NGSD individuals were used as populations. Each  $f_3$  statistical value is plotted in order of highest to lowest value from the top, and the names of the wolves are shown on the left side of each panel. Error bars represent standard errors.

Figure S11  
*f4* statistics testing the genetic affinity of the Japanese wolf with all other dogs. All Japanese wolves were used as a population. Z scores for each combination are plotted. We computed *f4* statistics where W in the schematic representation is shown and fixed in each panel and X represented any possible other dogs. Each Z score is listed in order of highest to lowest value from the top. Dotted line shows the Z score 3. Large size graphs of highest (NGS\_dog1) and lowest (Nigerian Dog2) affinity to the Japanese wolf are show in the first two panels. The names of the dogs are shown on the left or right sides of the panels. Small size panels of these two are surrounded by gray squares.

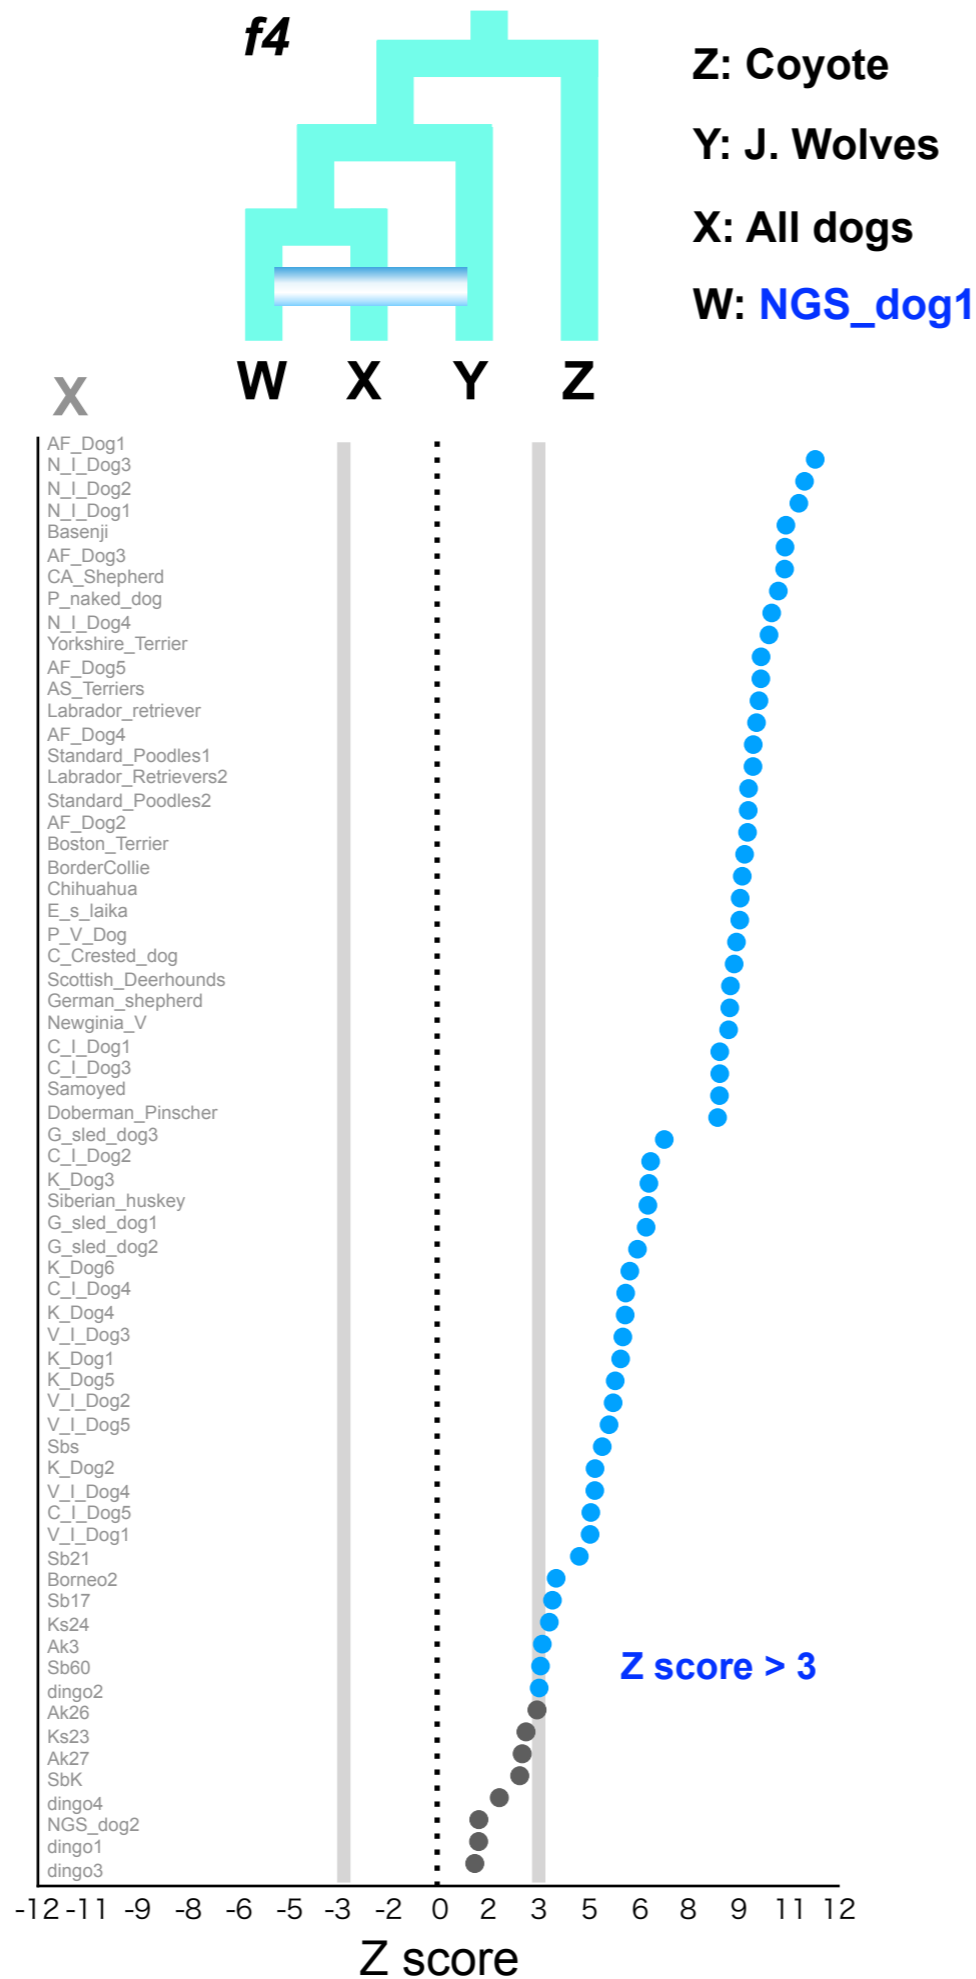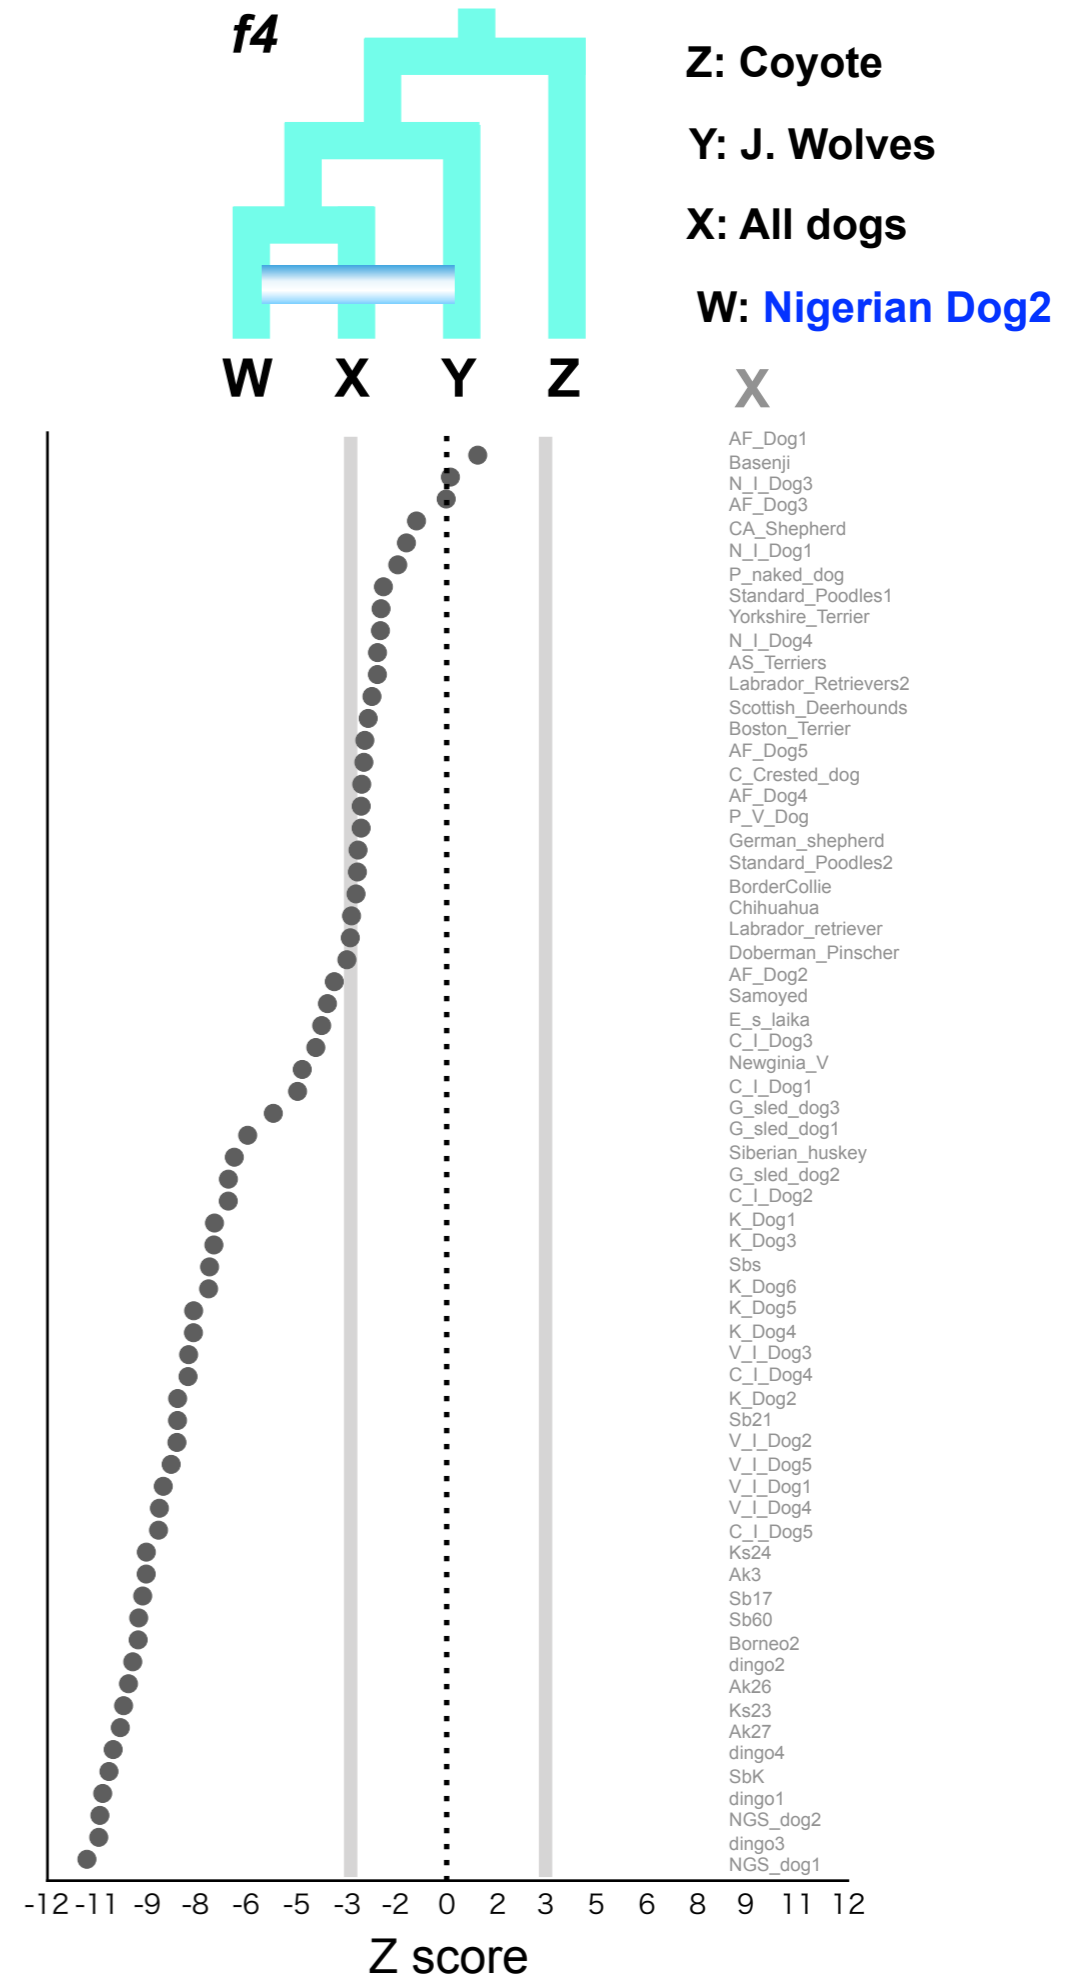

Figure S11

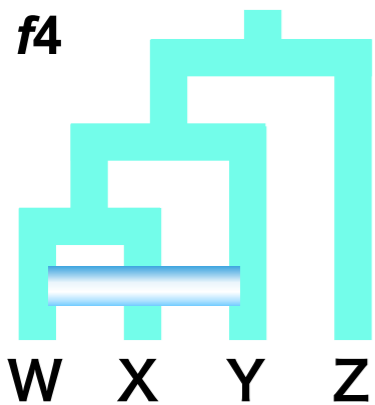

Z: Coyote  
 Y: J. Wolves  
 X: All dogs  
 W: Dog shown in the panel

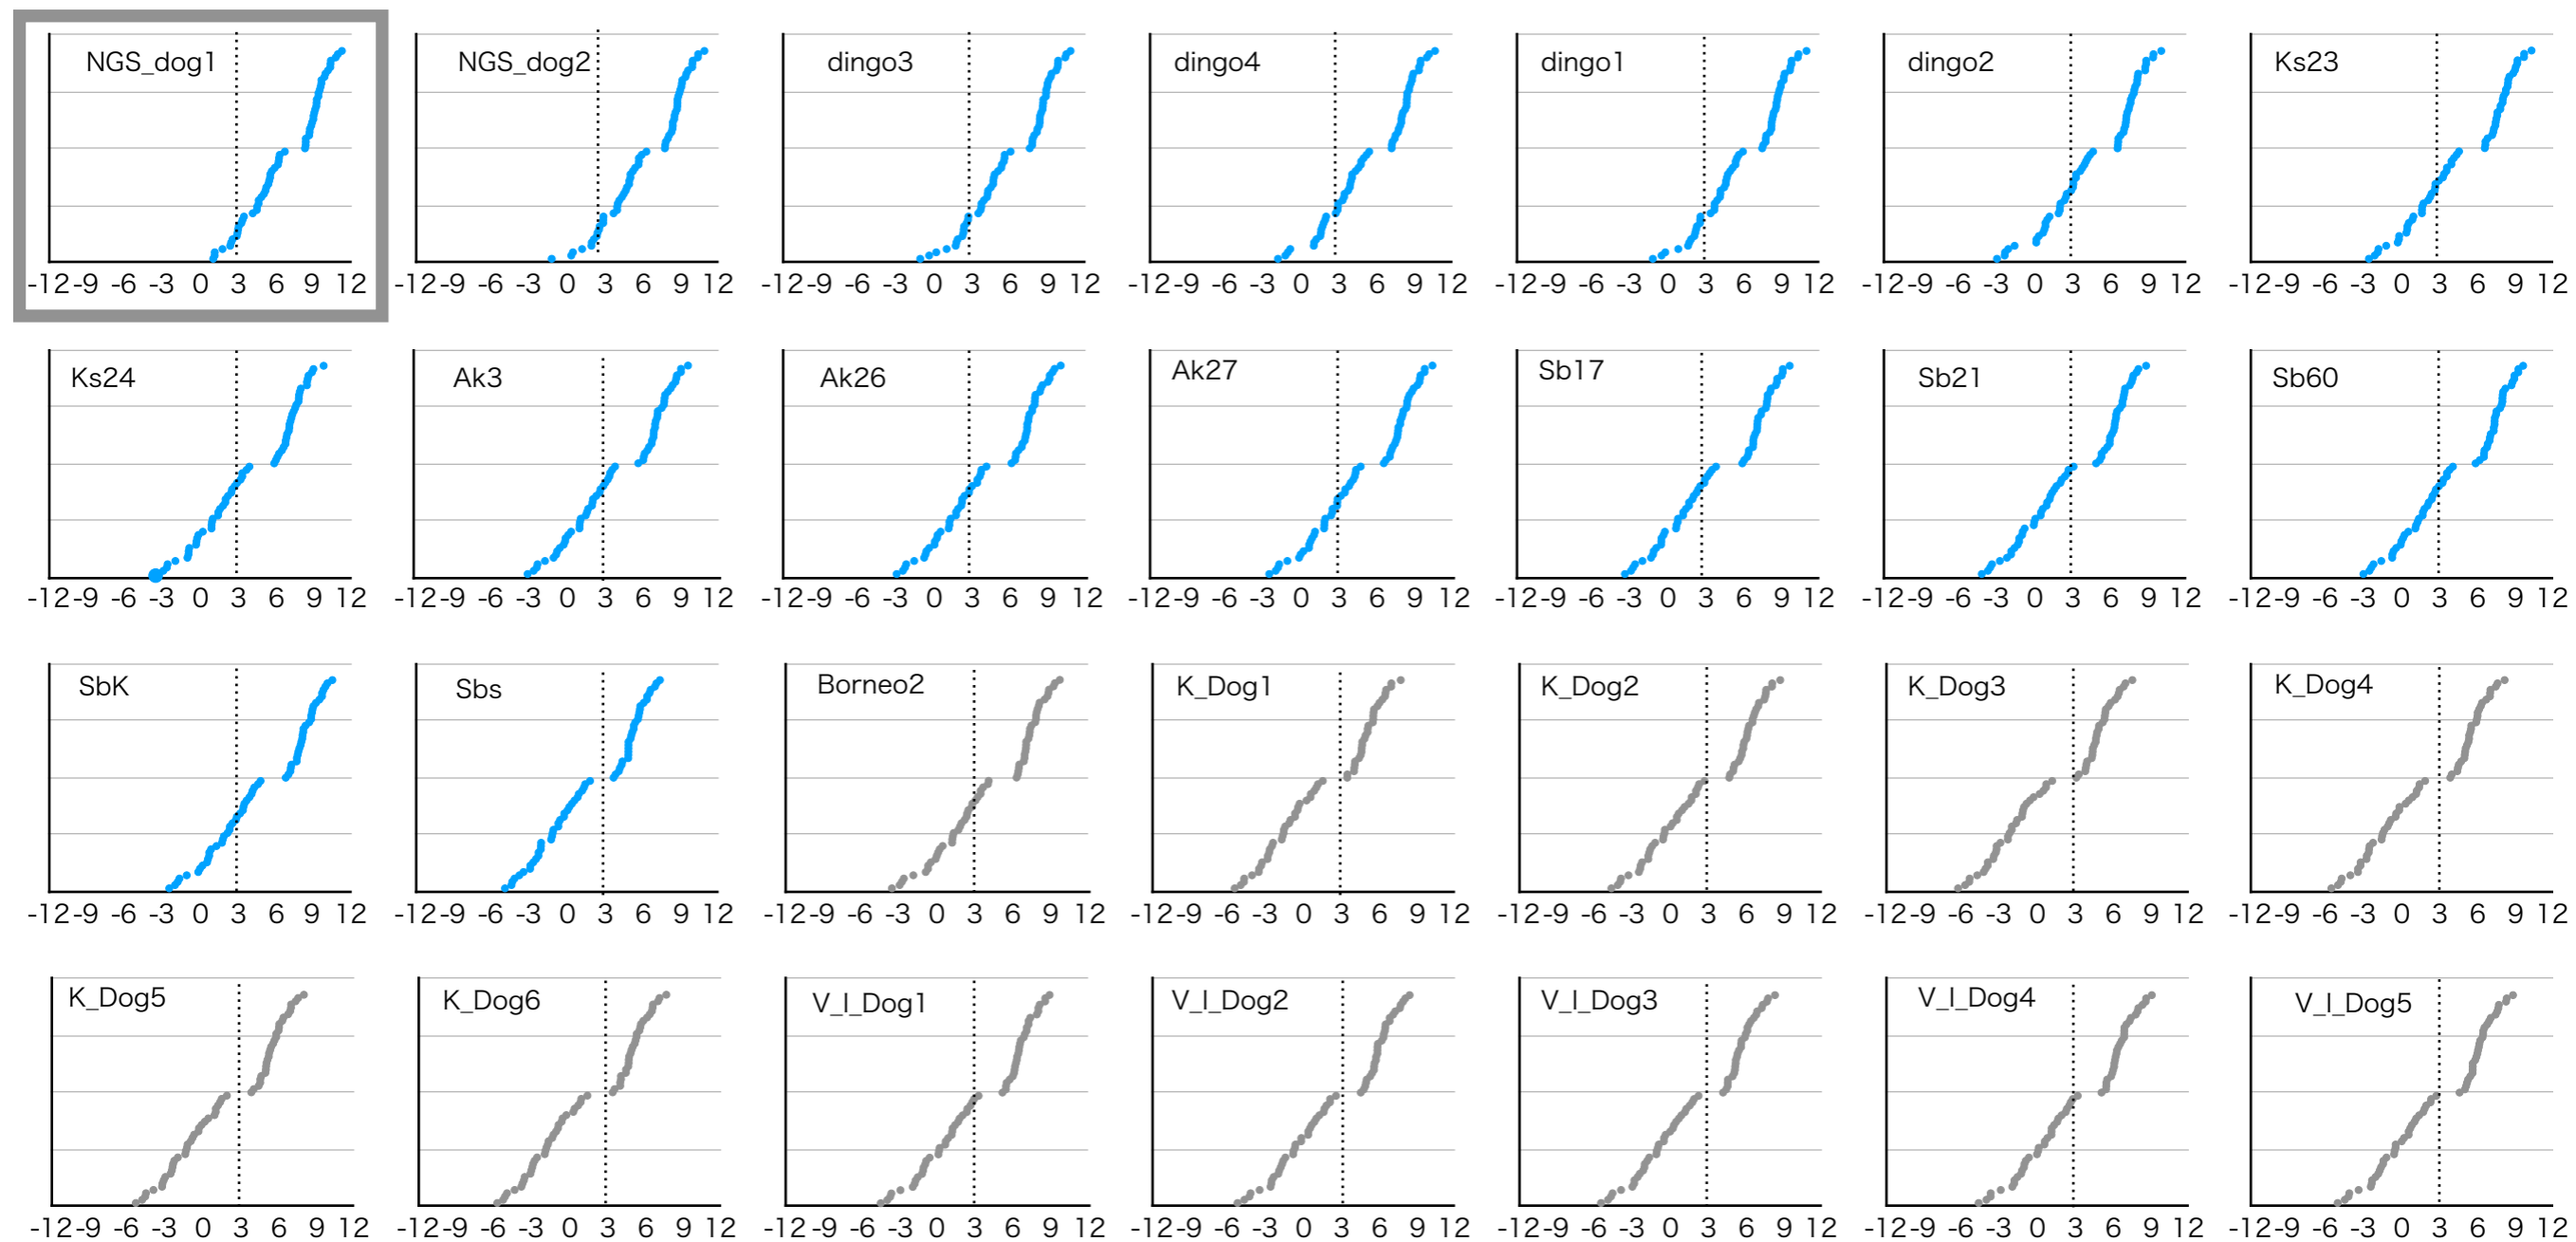

Figure S11 continued

Z score

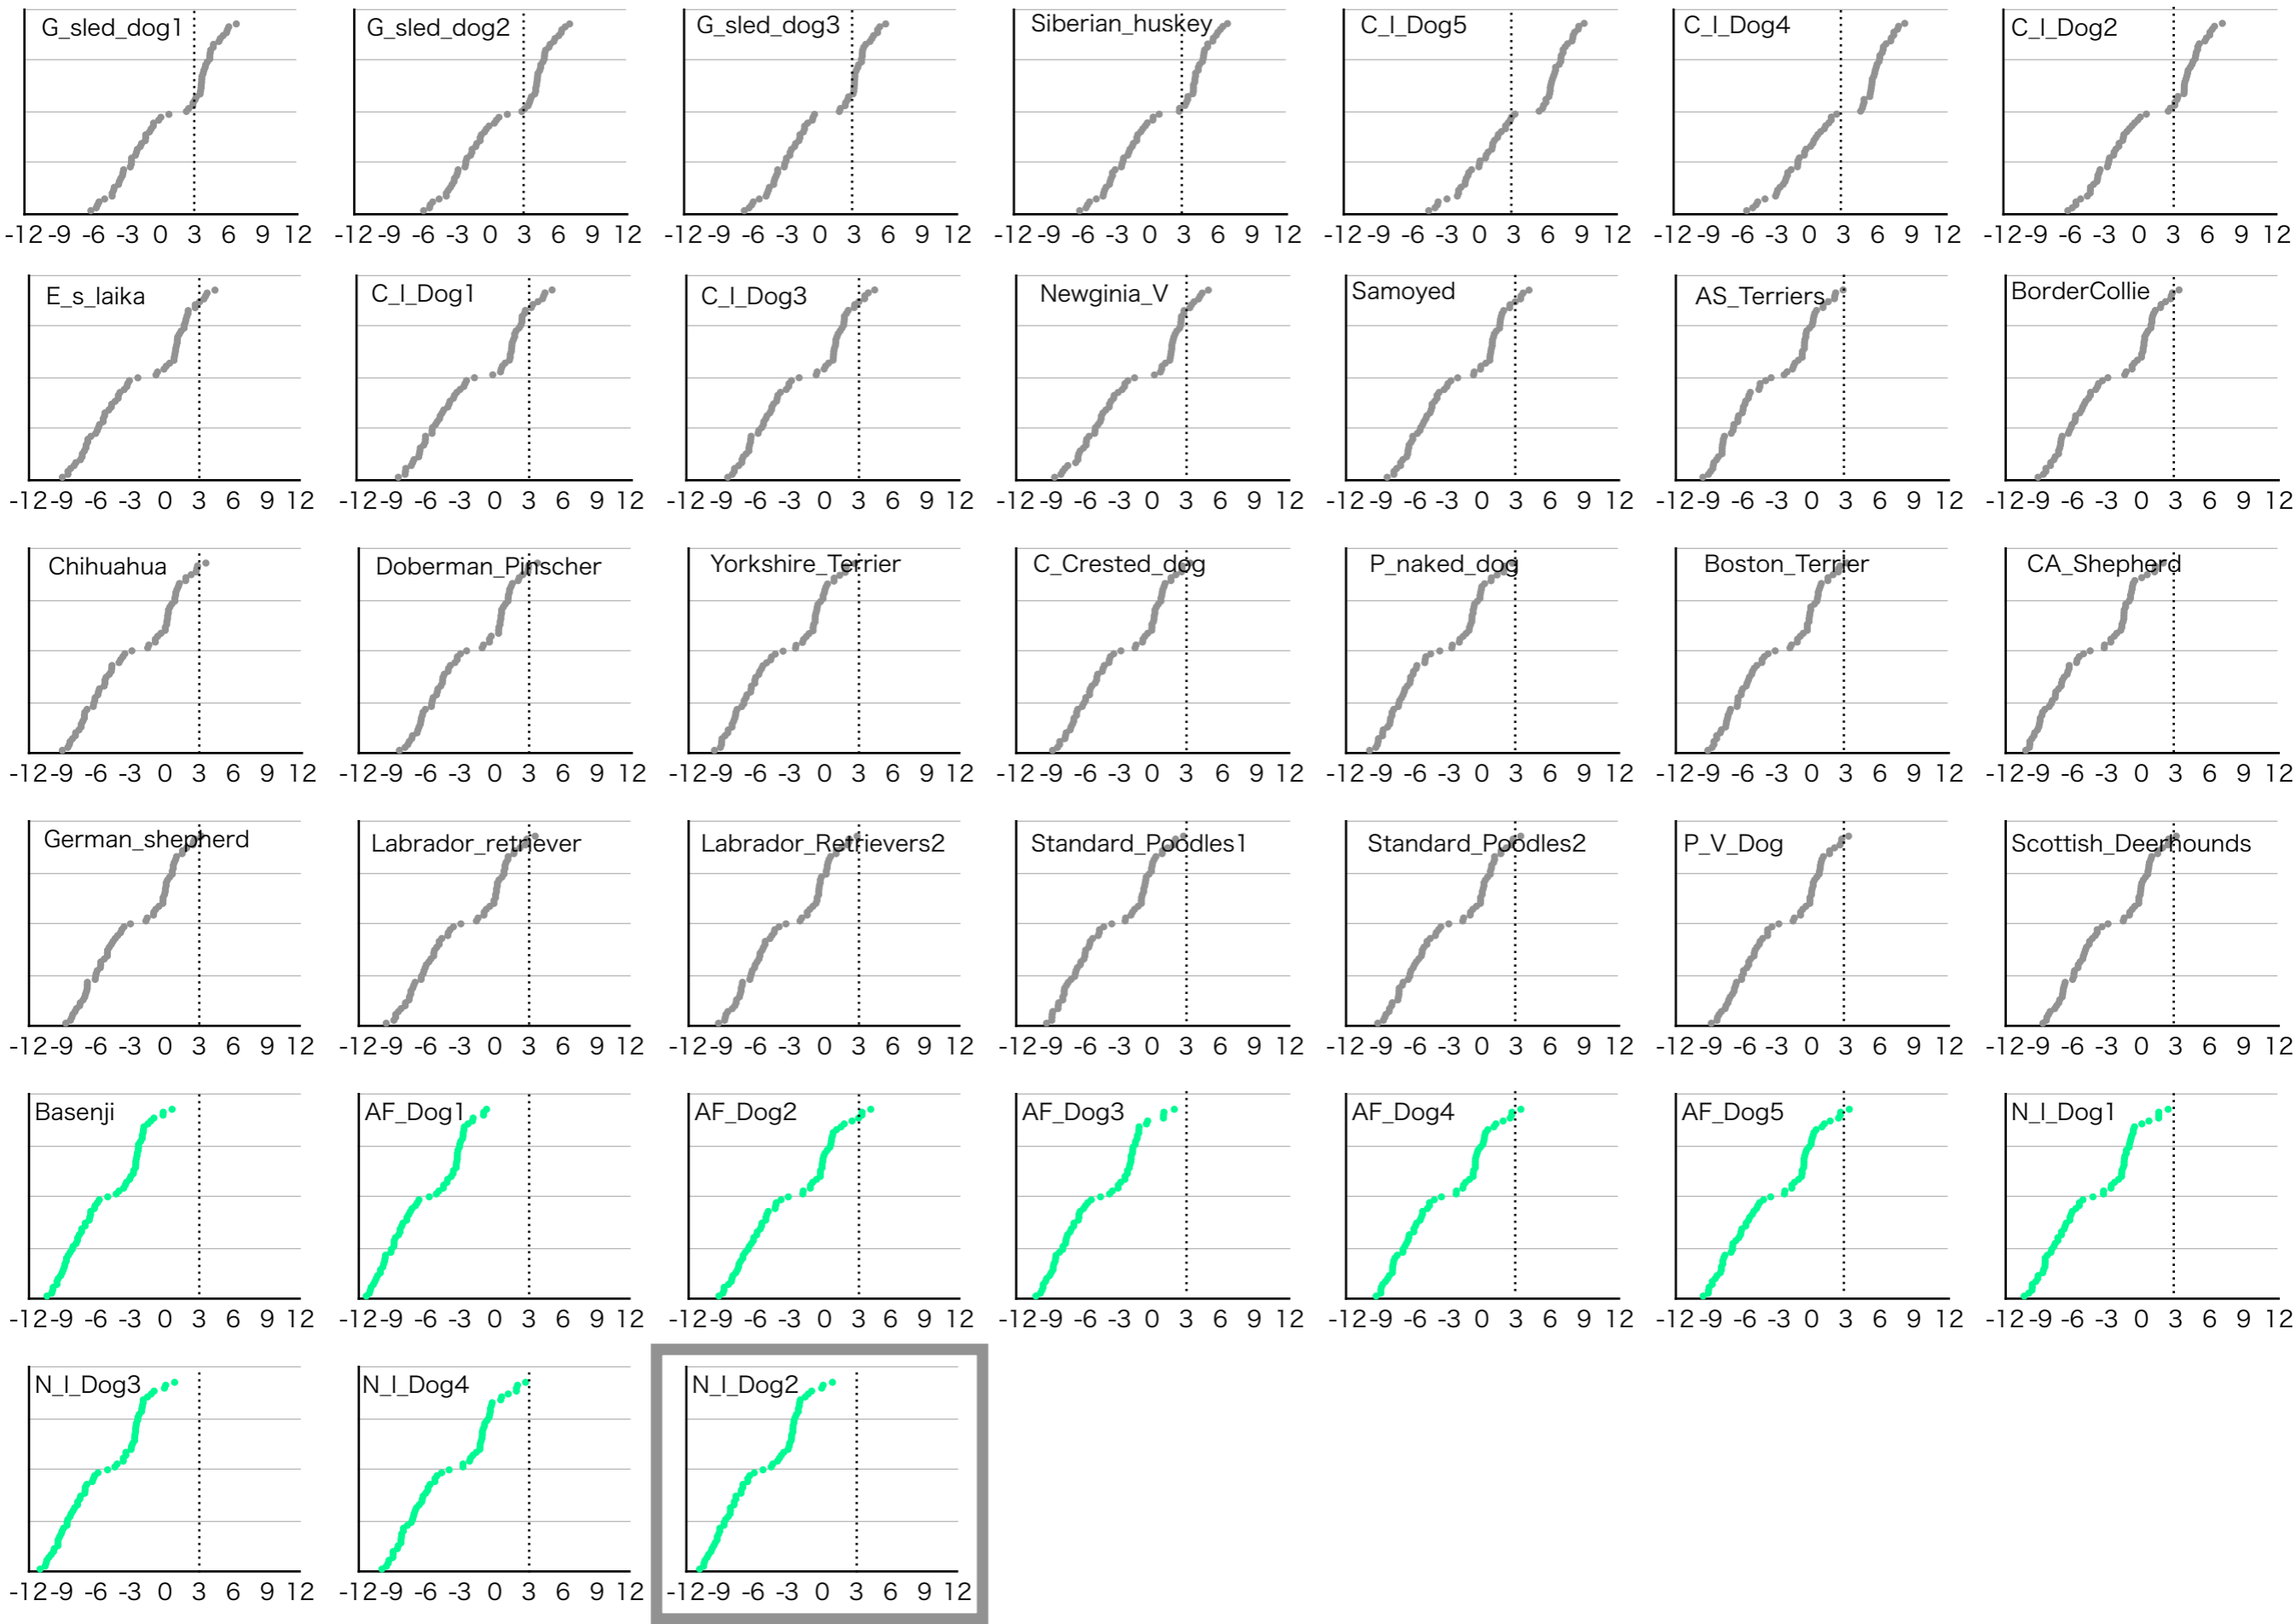

**Z score**

Figure S11 continued

North America  
Canada/Arctic

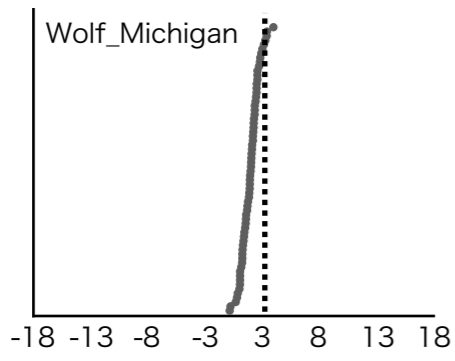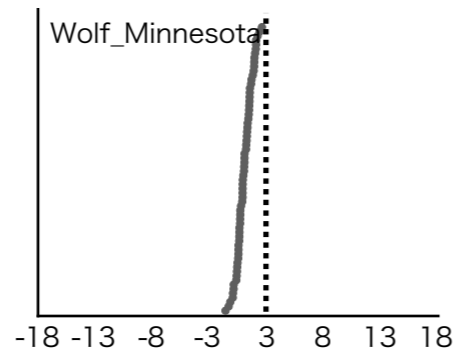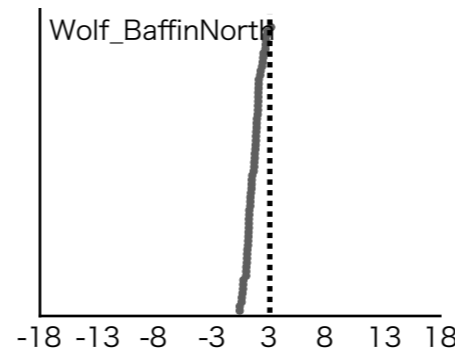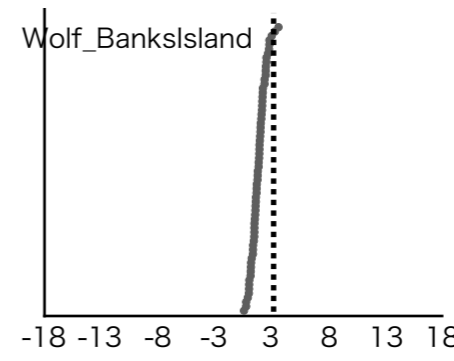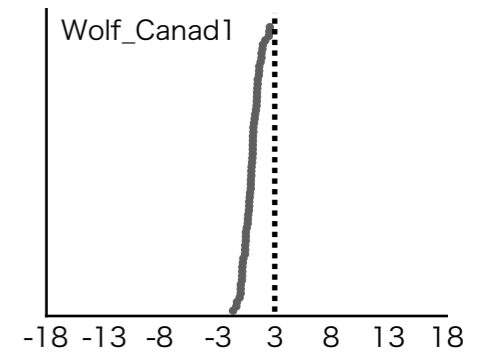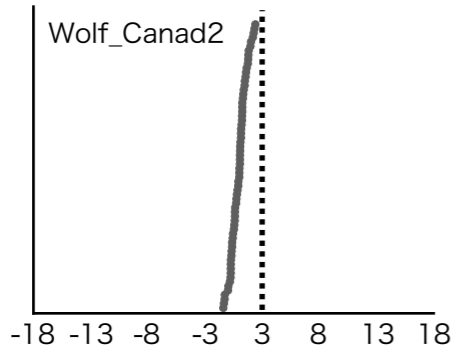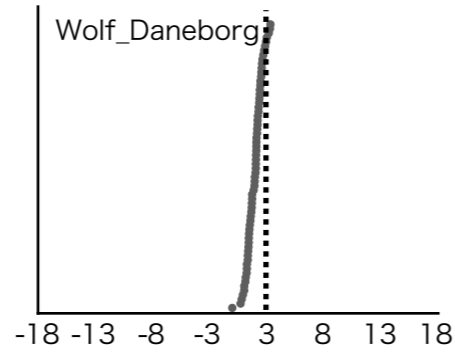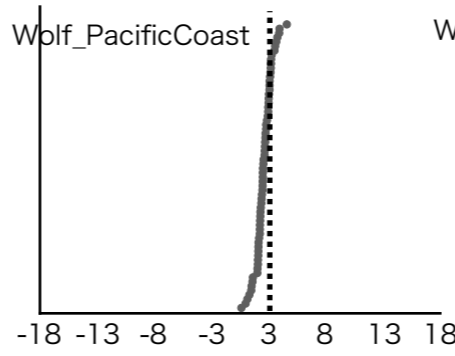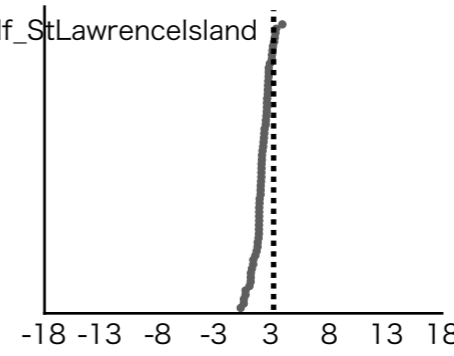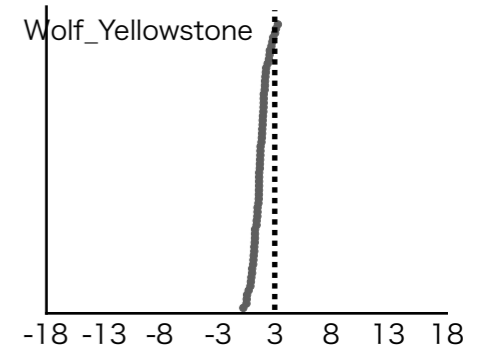

f4

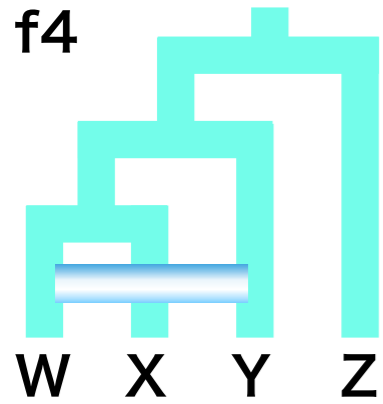

Z: Coyote  
Y: Wolves shown in the panel  
X: Japanese Wolves  
W: Each of the dogs

Europe

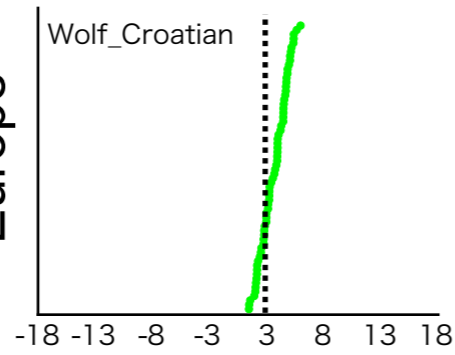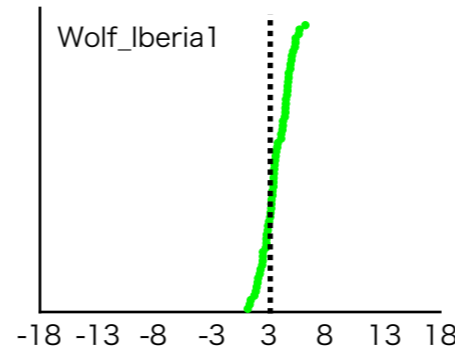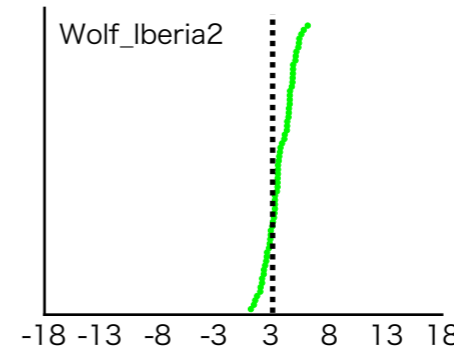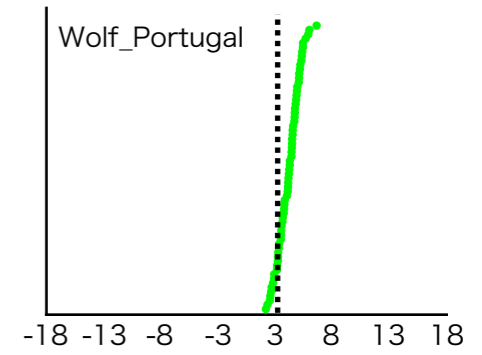

Middle East  
India

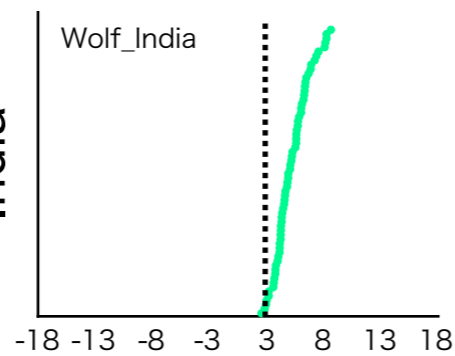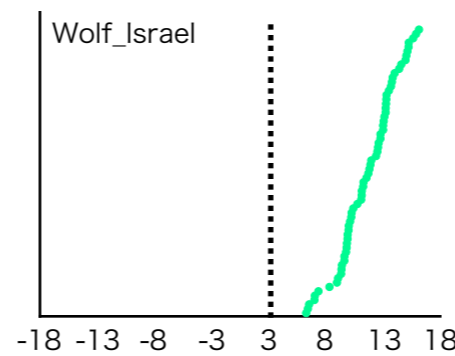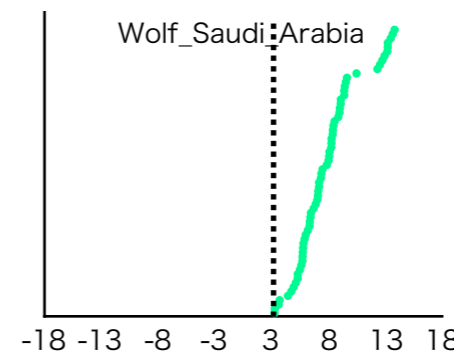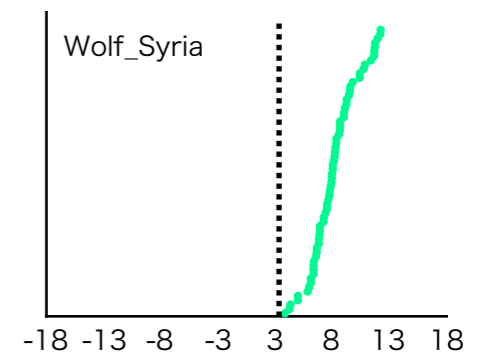

East Asia

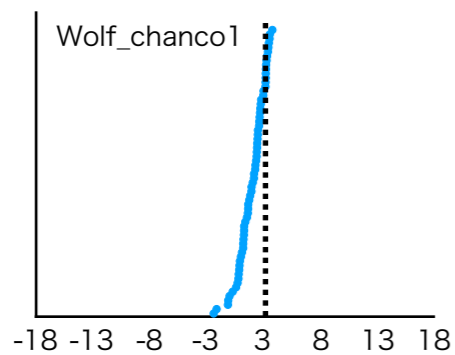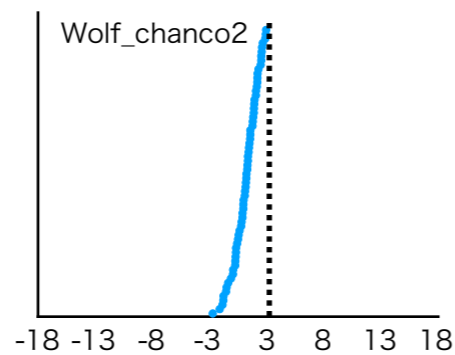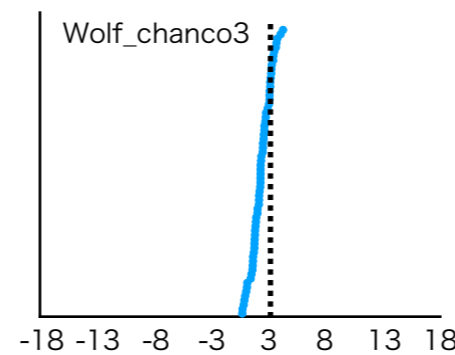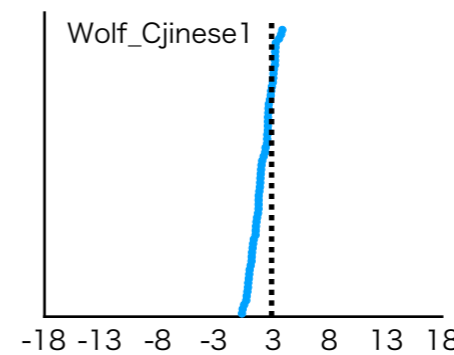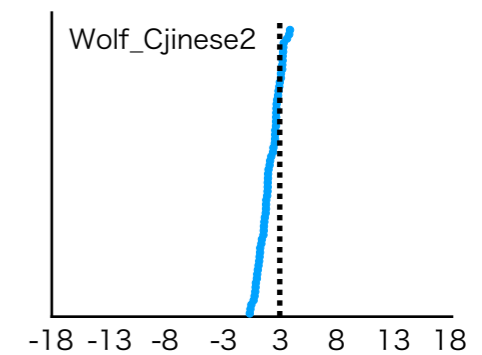

Figure S12

Z score

## Figure S12

*f*<sub>4</sub> statistics testing the genetic affinity of gray wolves shown in each panels with all dogs. Z scores for each combination are plotted in order of highest to lowest value from the top. We computed *f*<sub>4</sub> statistics where Y in the schematic representation is shown and fixed in each panel and W represented any possible other dogs. Dotted line shows the Z score 3.



Figure S13  
Maximum likelihood tree  
based on 2,065,200 SNPs.  
Node labels indicate  
bootstrap replicates.

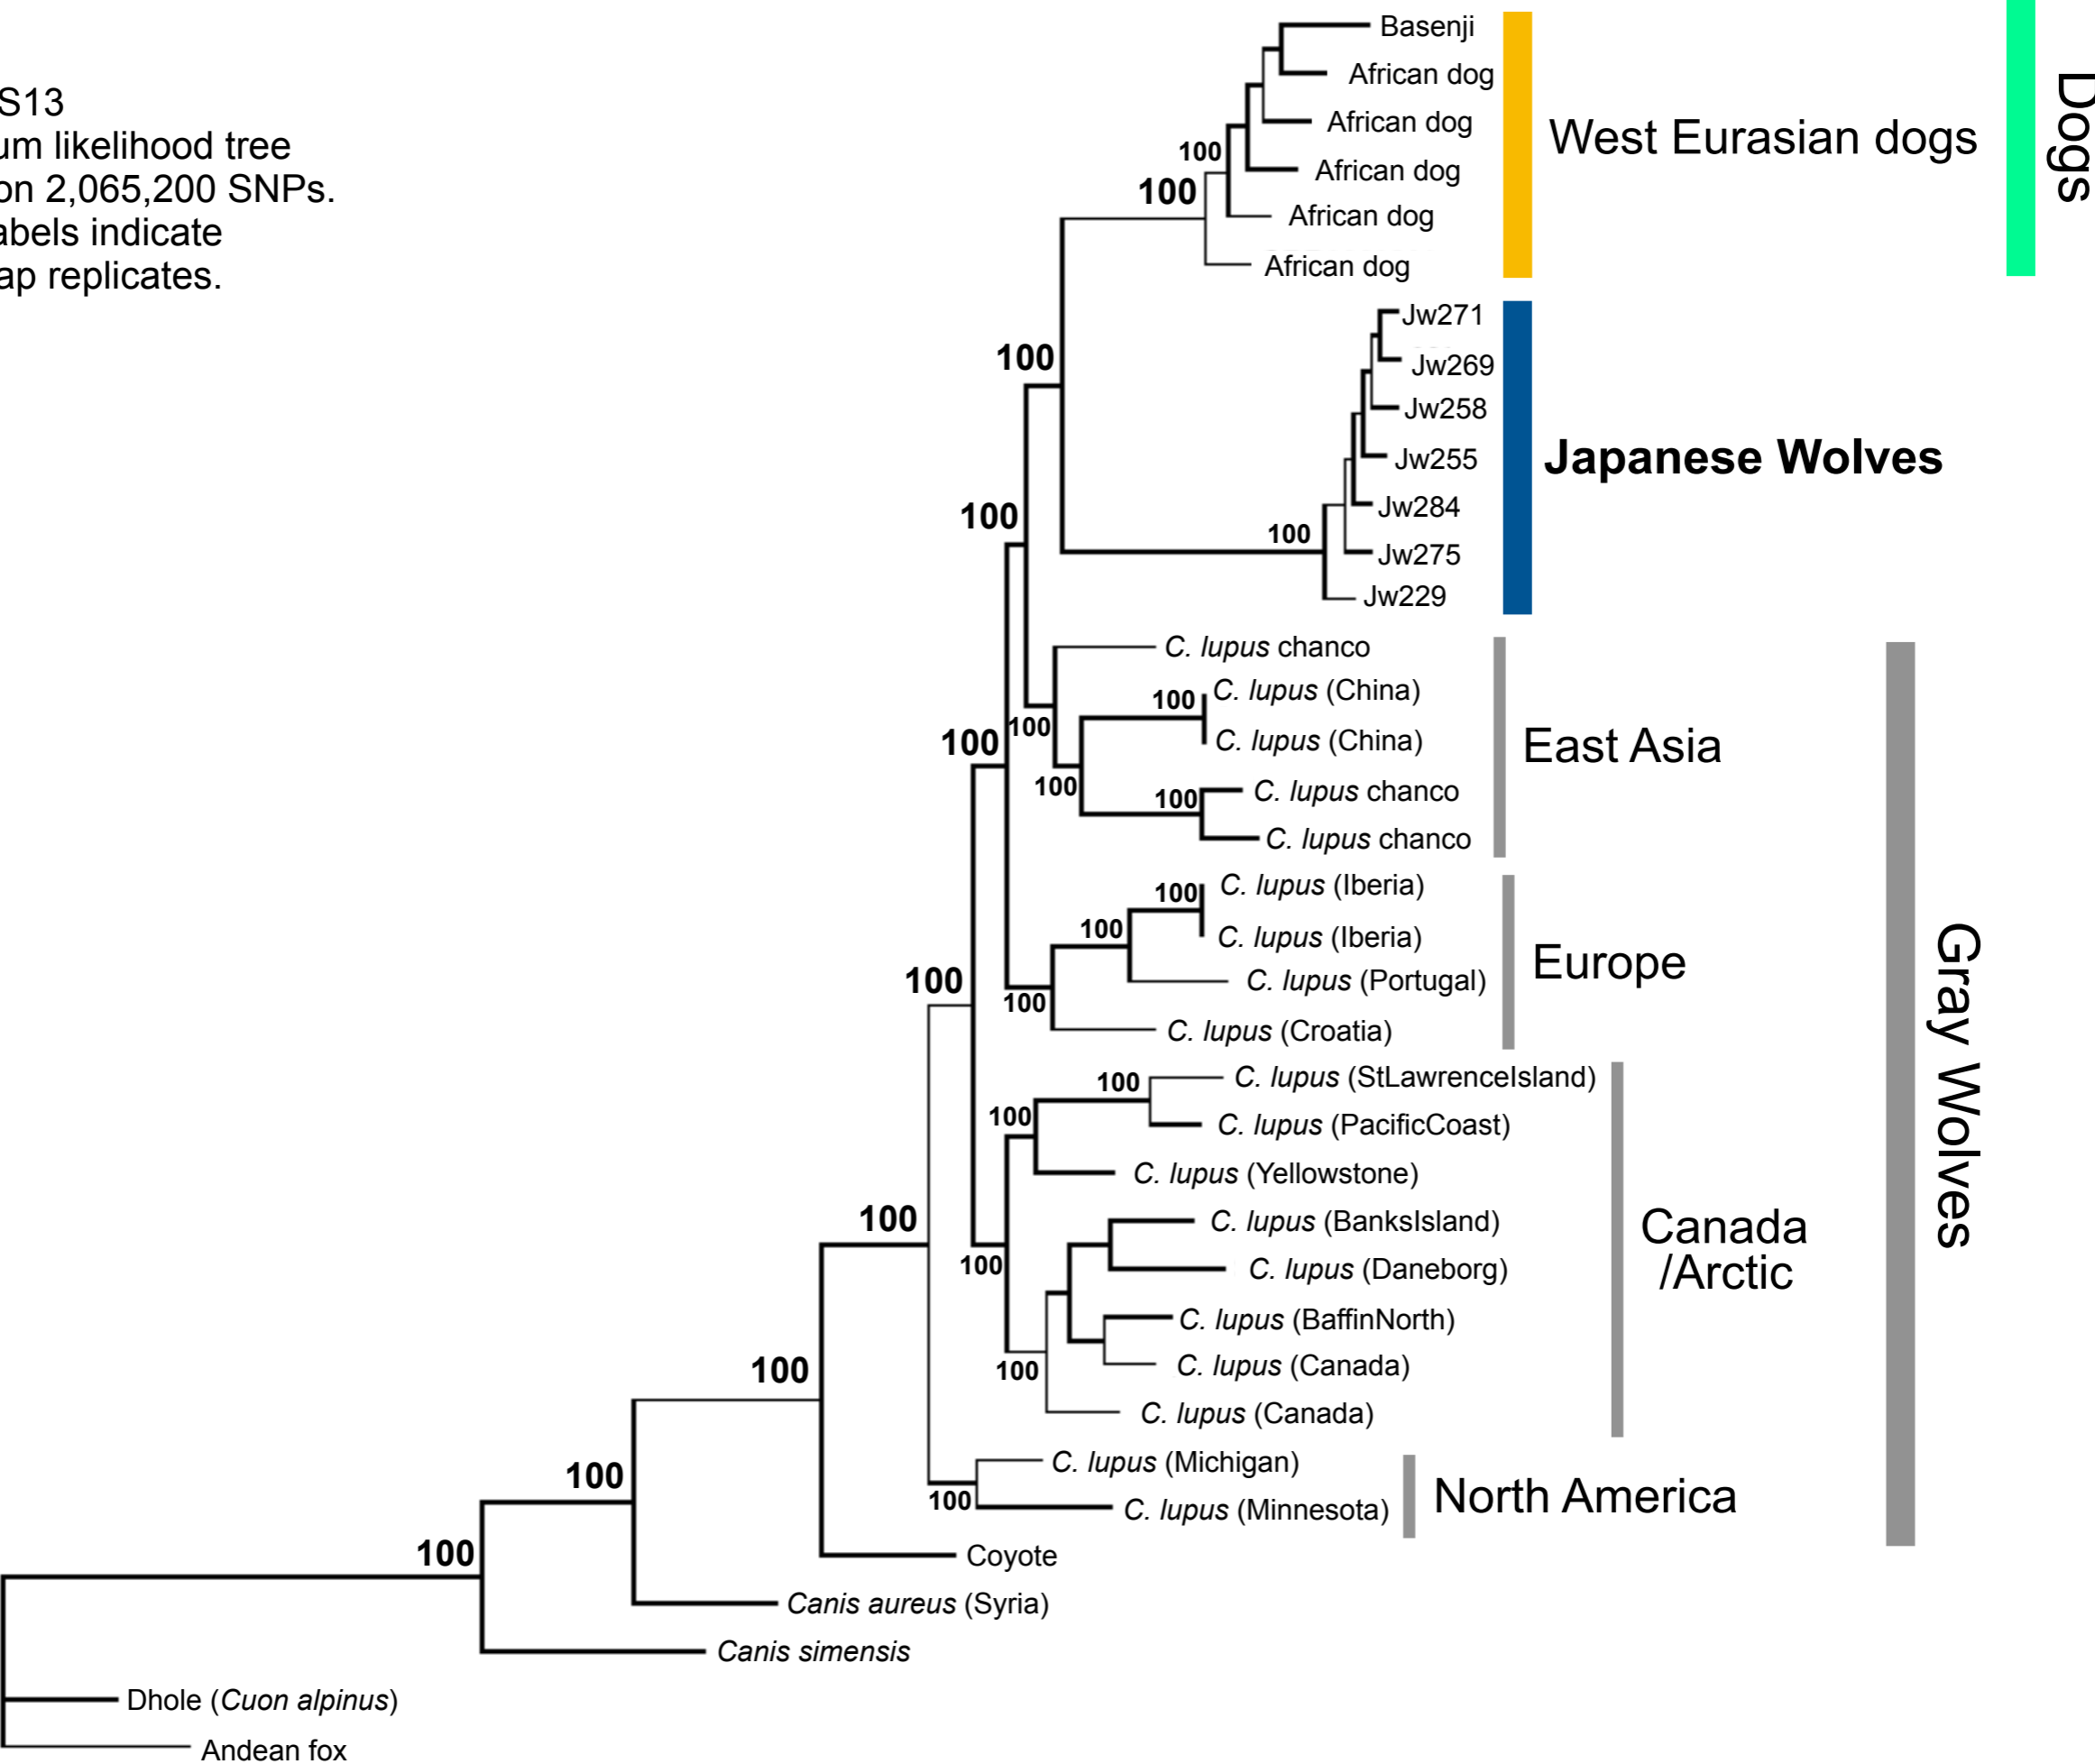

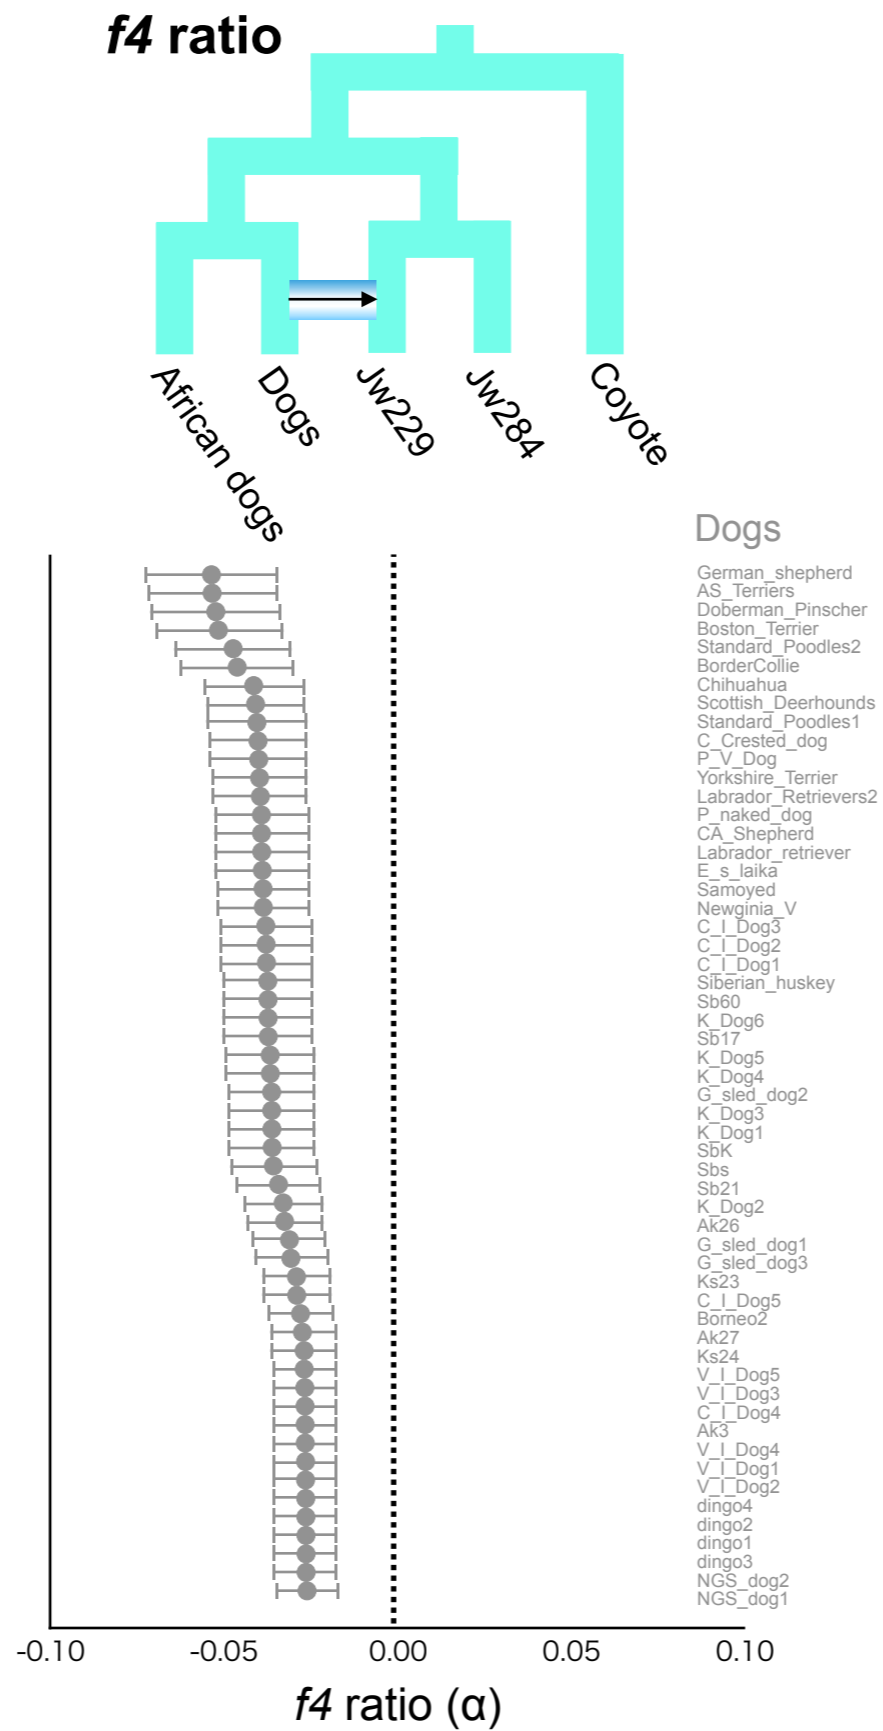

Figure S14

*f4*-ratio test to estimate proportion of genome introgression from dogs to the Japanese wolf. Each *f4*-ratio  $\alpha$  value is plotted in order of lowest to highest value from the top, and the names of the dogs are shown on the right side of the panel. Error bars represent standard errors.

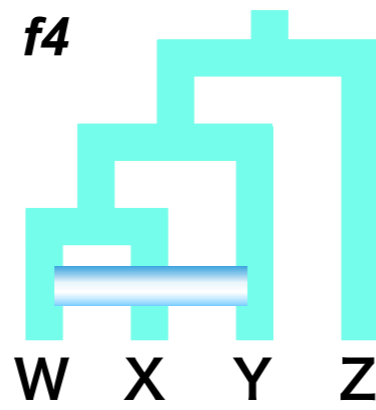

Z: Coyote

Y: Dingo/NGSD

X: other Japanese Wolves

W: Japanese Wolf shown above the panel

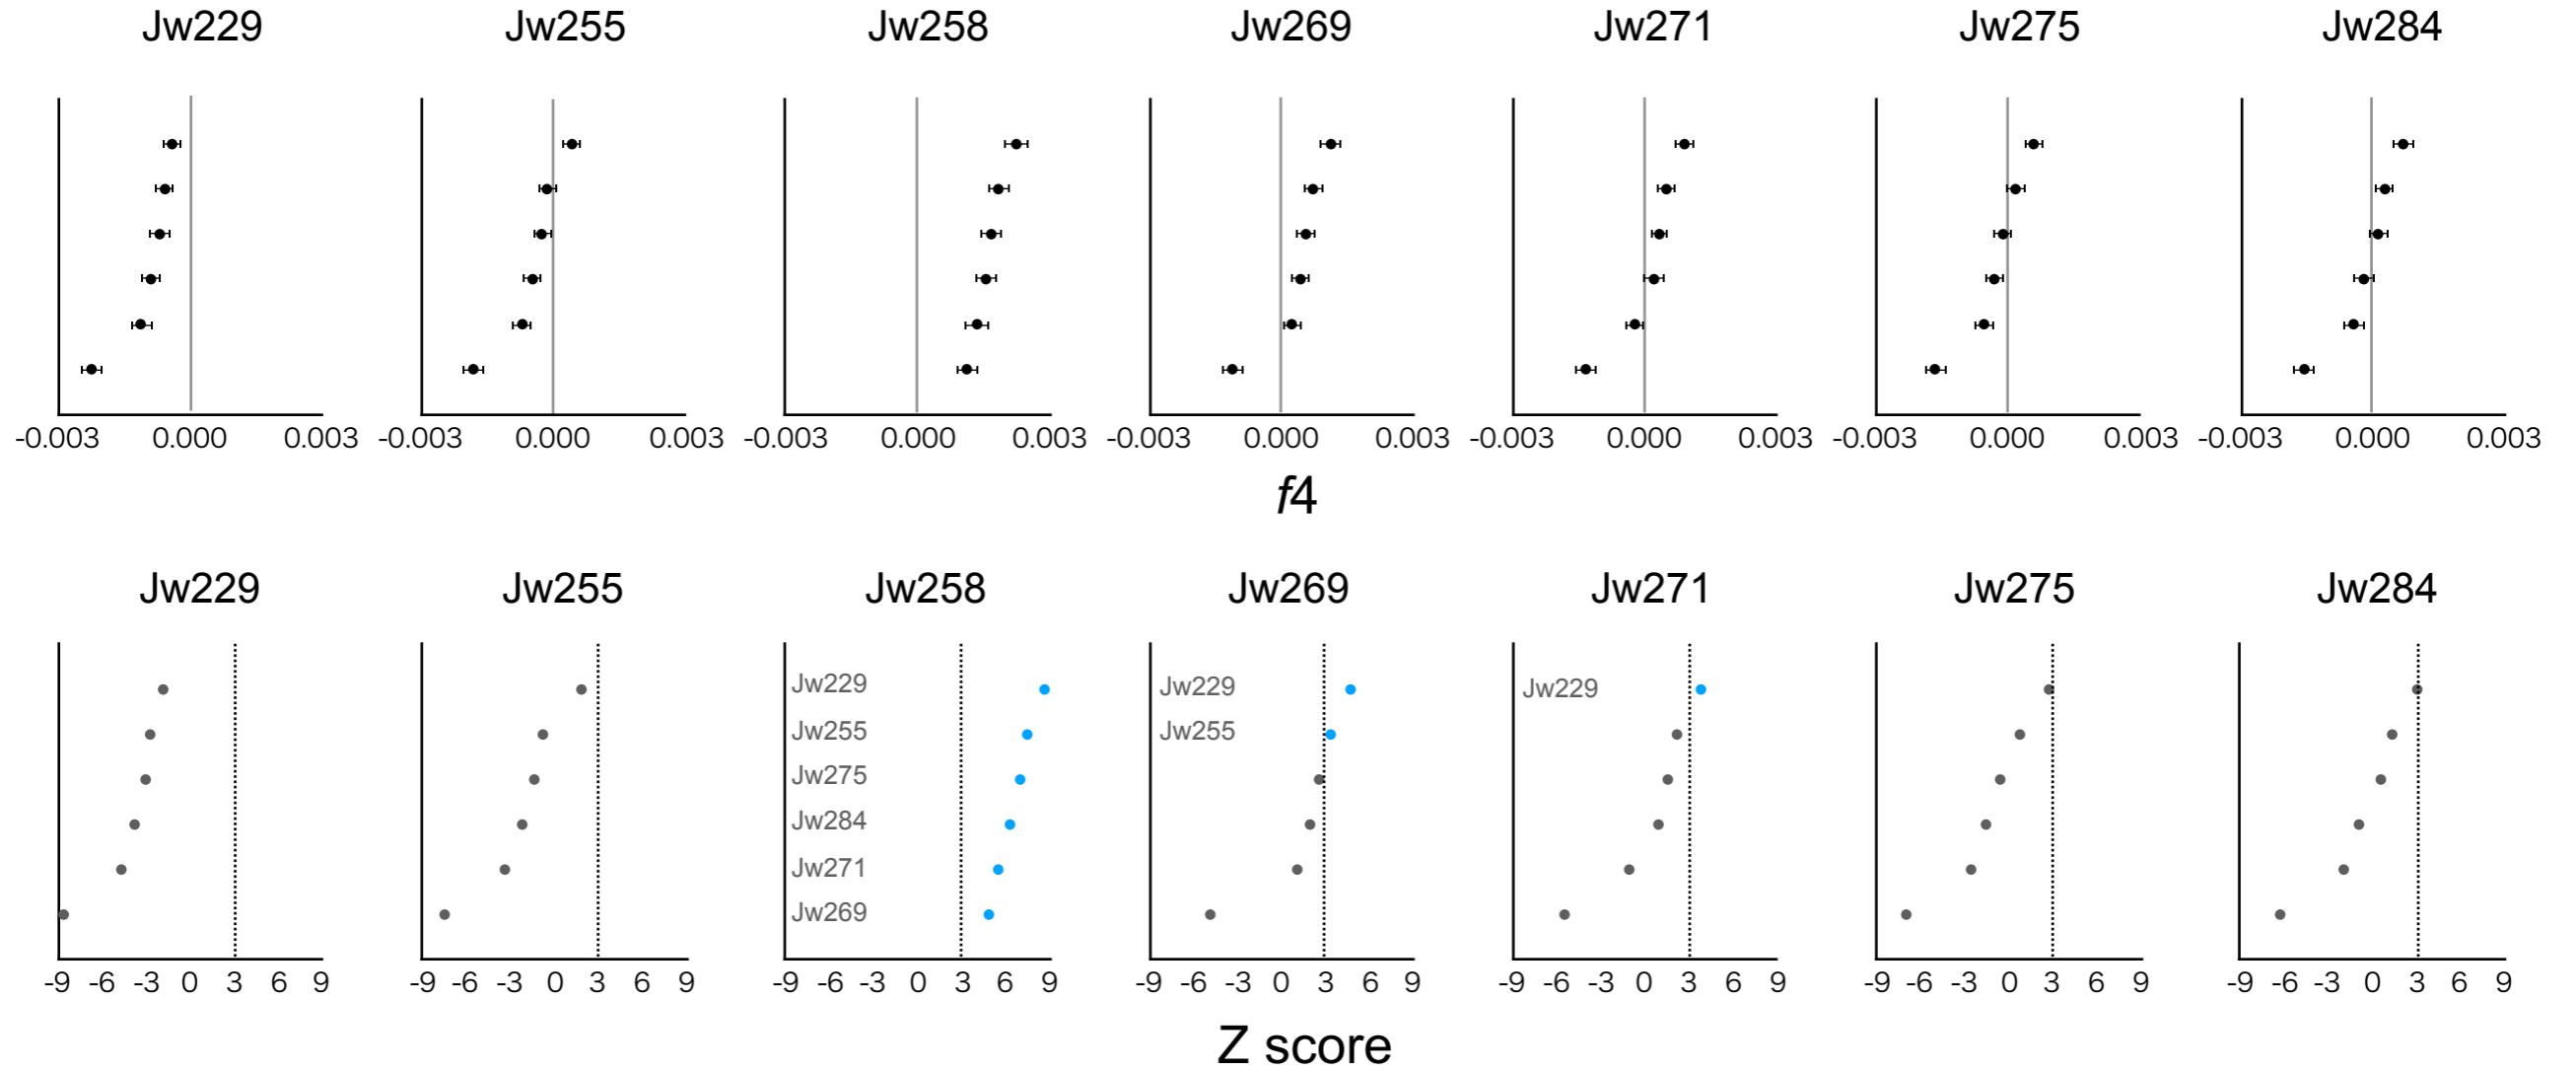

Figure S15

(A)  $f_4$  statistics testing the difference of the affinity to dingo/NGSD between the Japanese wolf individuals.  $f_4$  statistics (upper panels) and Z score (lower panels) value is plotted in order of highest to lowest value from the top. Z score above 3 is colored in blue. When the Japanese wolf individual showing a significant affinity to dingo/NGSD, the names of the Japanese wolf individual at the position X in the schematic representation are shown on the left side of Z score panel.

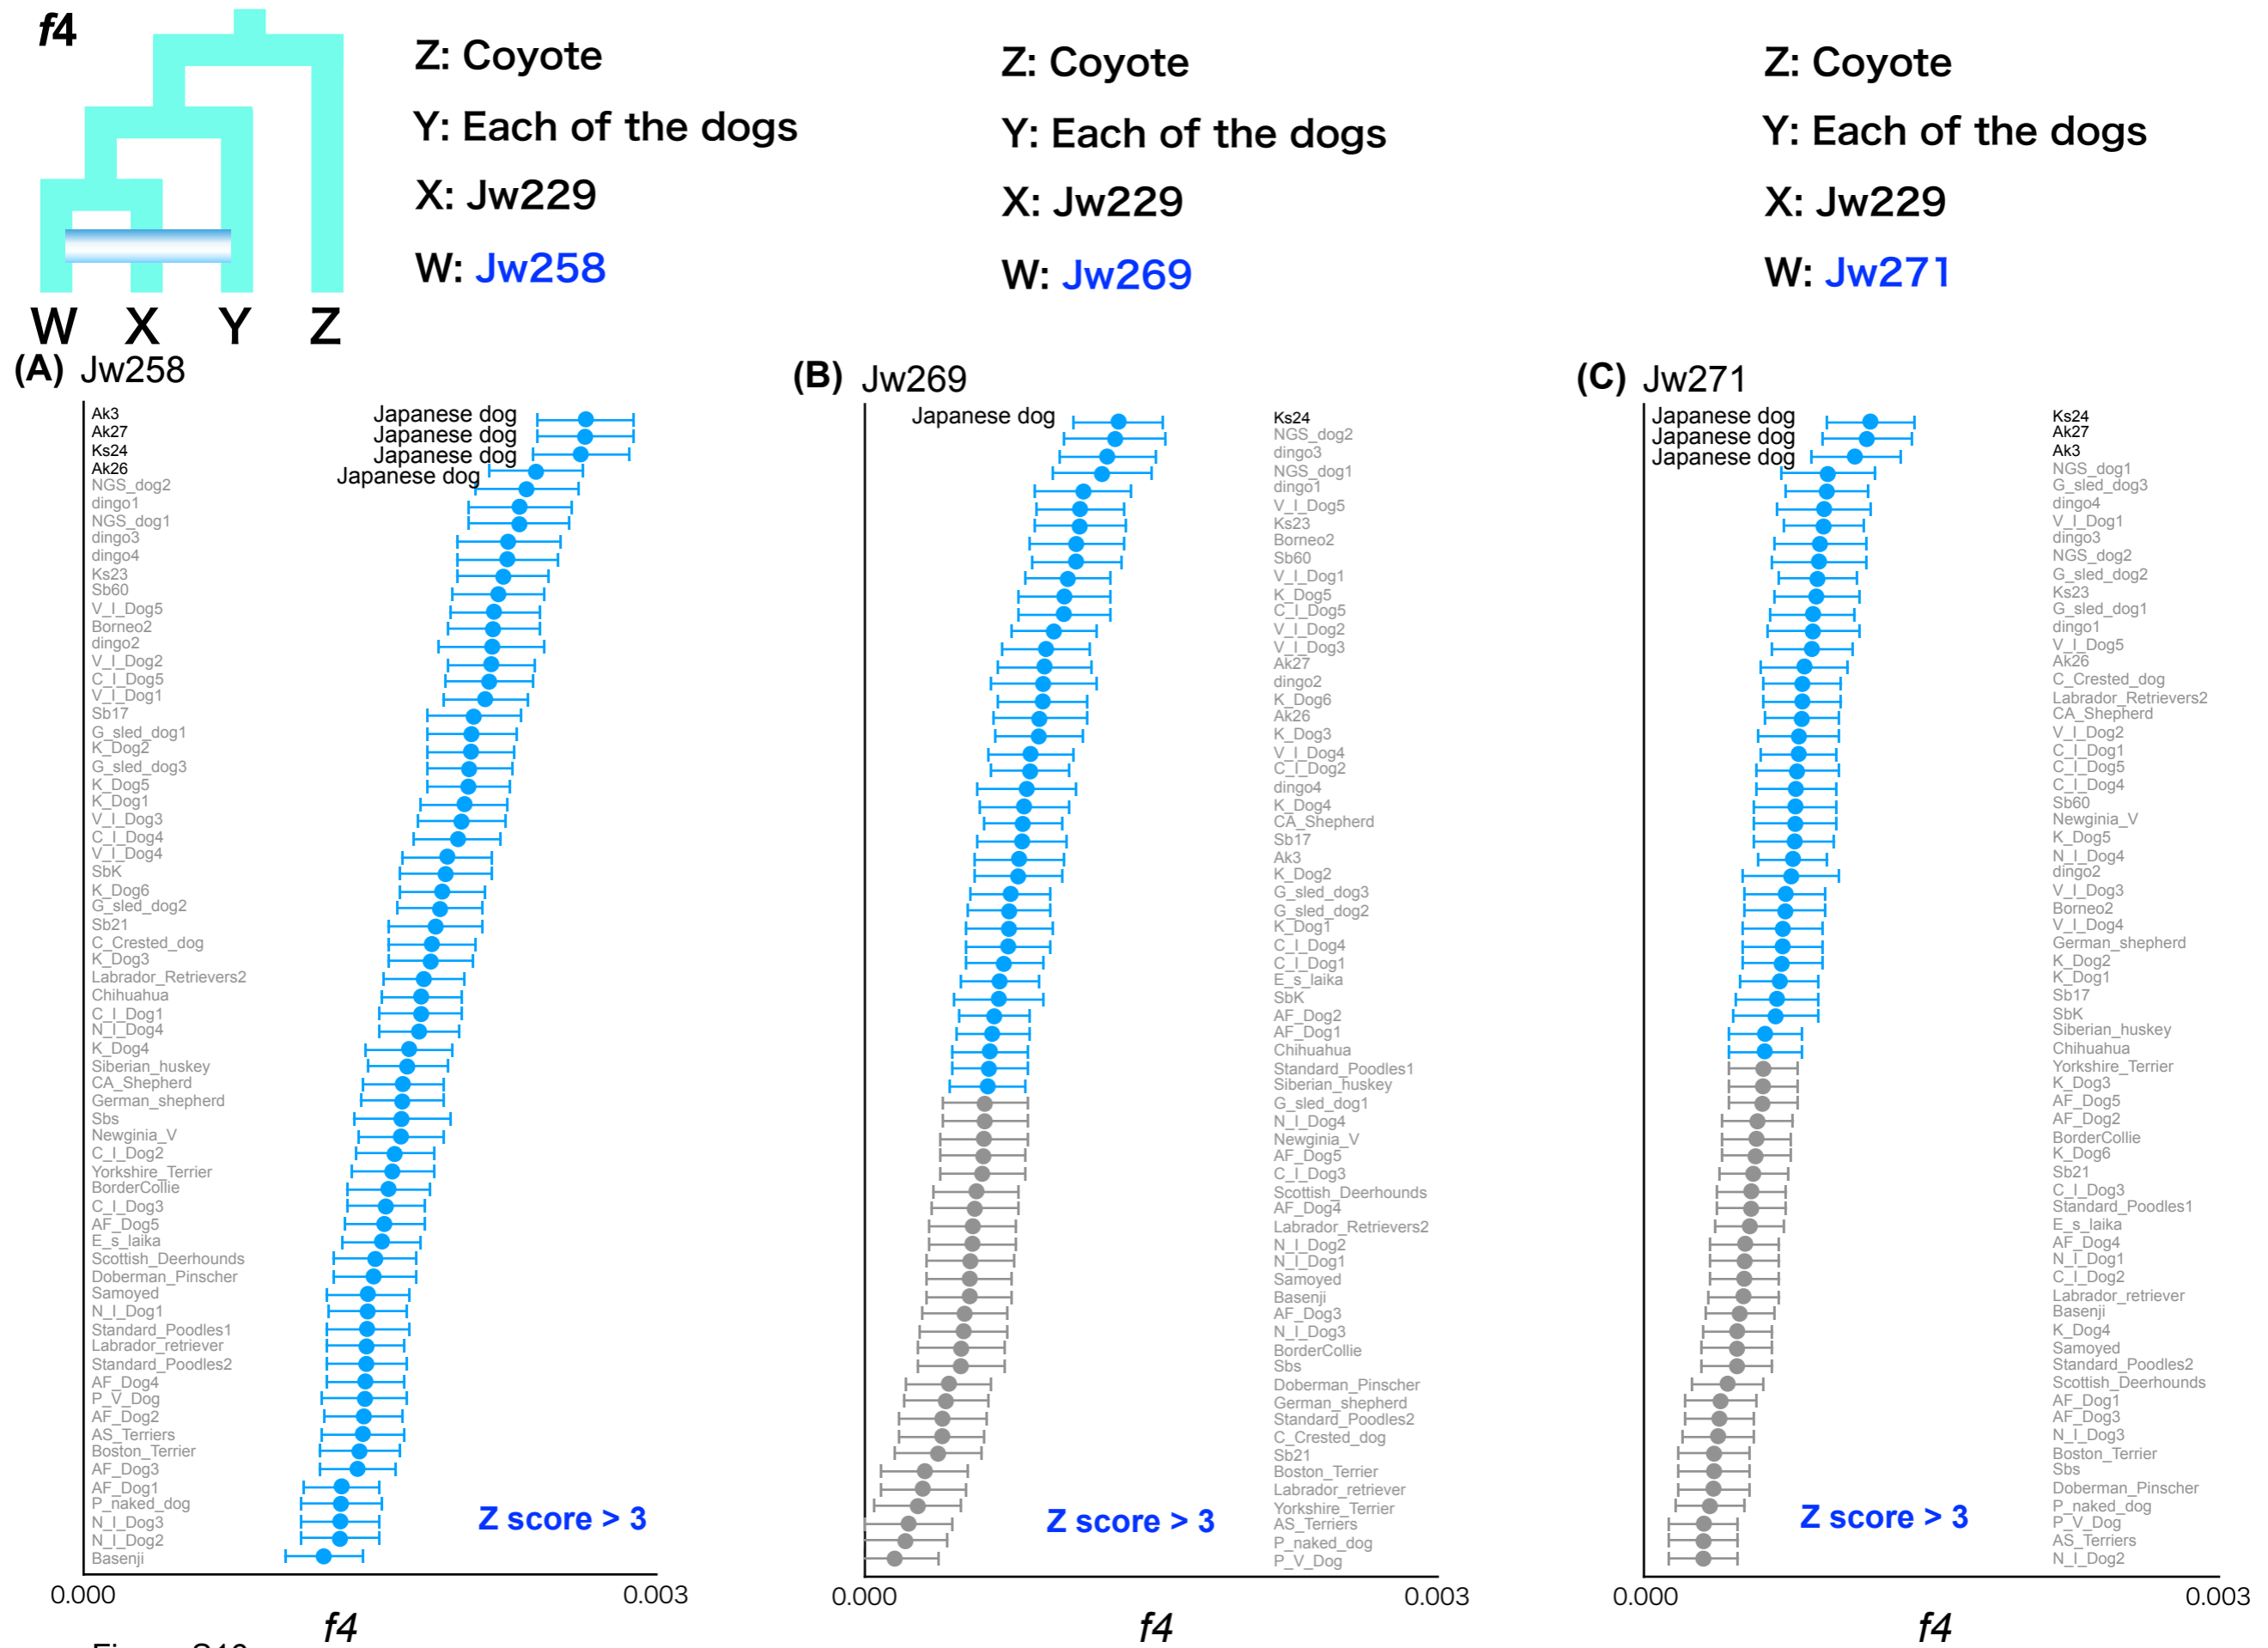

Figure S16

(A)  $f_4$  statistics testing the relationships between (A) Jw258, (B) Jw269, and (C) Jw271 and all dog individuals. Each Z score is plotted in order of highest to lowest value from the top, and the names of dogs are shown on the left or right sides of each panel (see table S2). Z score above 3 is colored in blue.

### Outgroup $f_3$

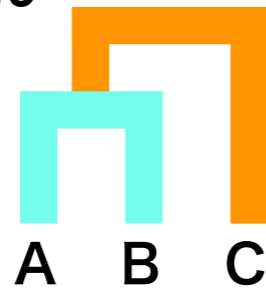

A: All dogs  
B: dingo/NGSD  
C: Coyote

(A)

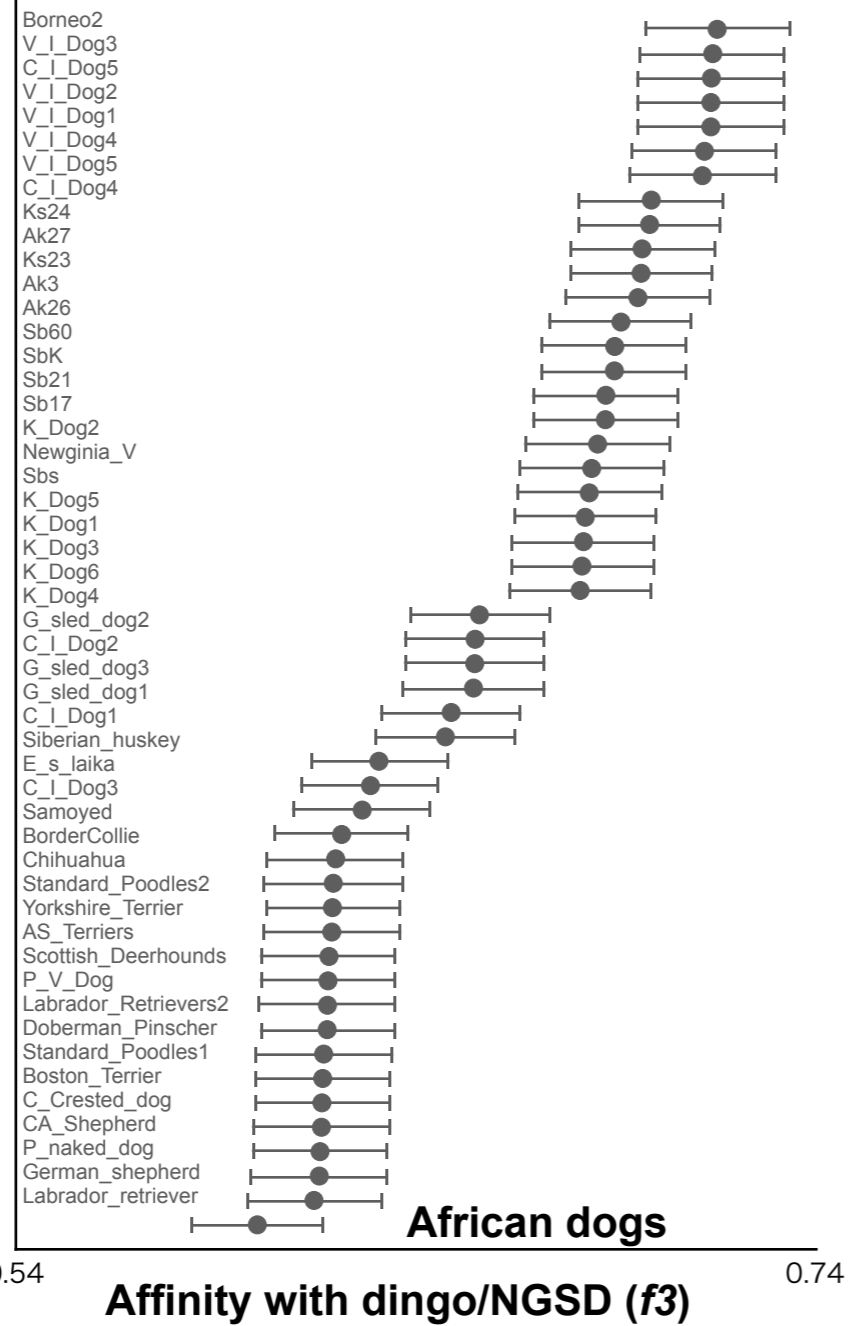

### Outgroup $f_3$

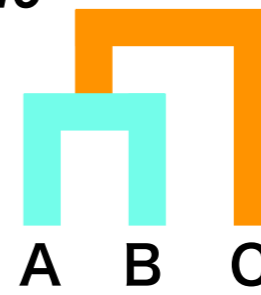

A: All dogs  
B: African dogs  
C: Coyote

(B)

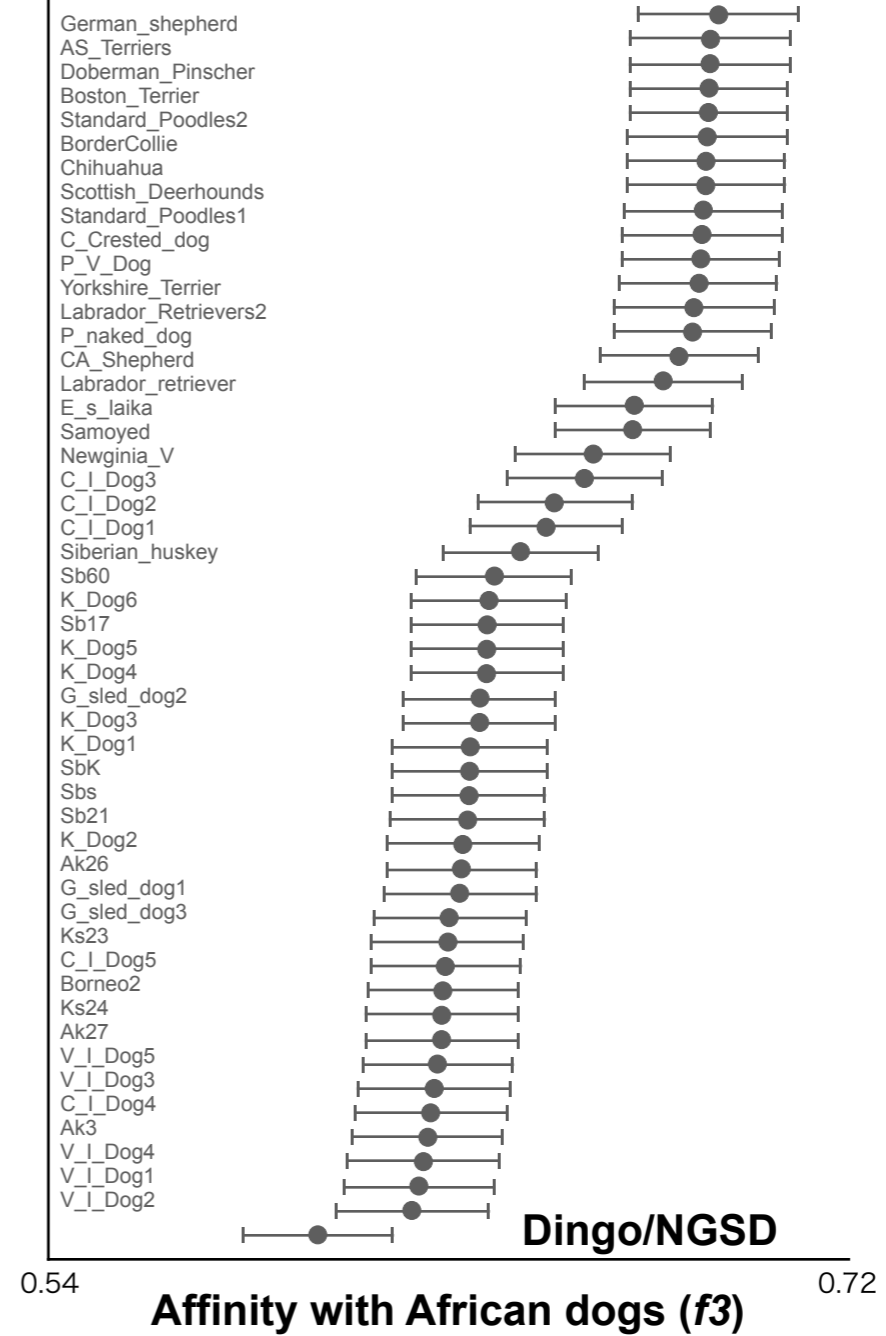

Figure S17

Shared genetic drift between (A) dingo/NGSD and (B) African dogs and all dogs measured by outgroup  $f_3$  statistics. Each of the African dogs and dingo/NGSD individuals were used as populations. Each  $f_3$  value is plotted in order of highest to lowest value from the top, and the names of the dogs are shown on the left side of the panel. Error bars represent standard errors.

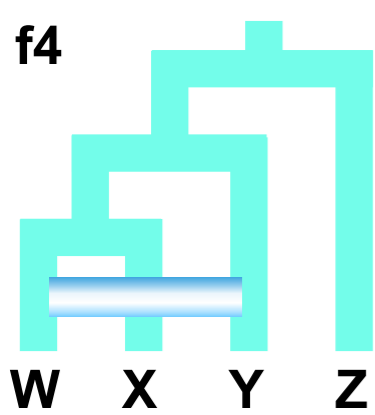

**Z: Coyote**

**Y: NGSD1**

**X: All dogs**

**W: Dog shown in the panel**

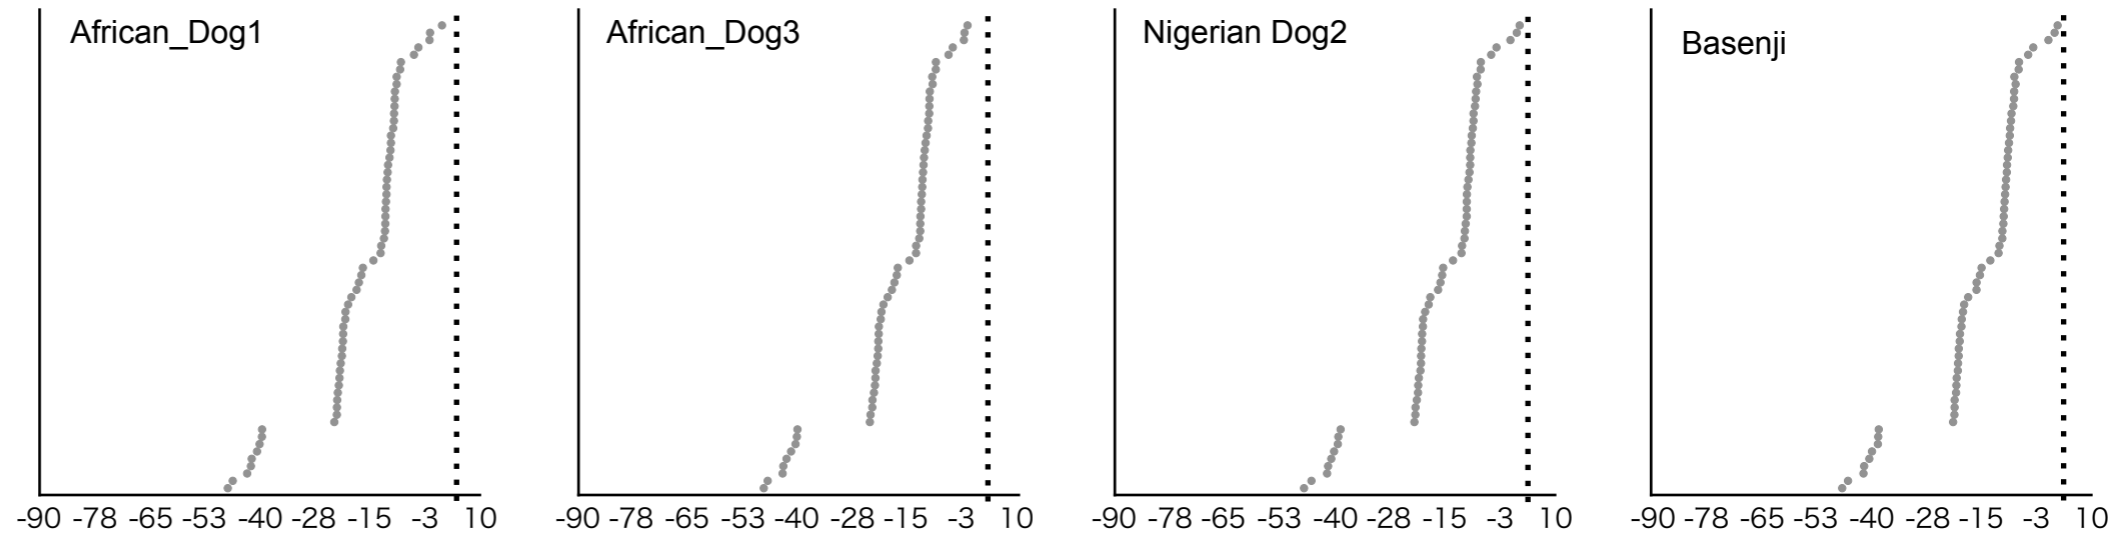

**Z: Coyote**

**Y: Basenji**

**X: All dogs**

**W: Dog shown in the panel**

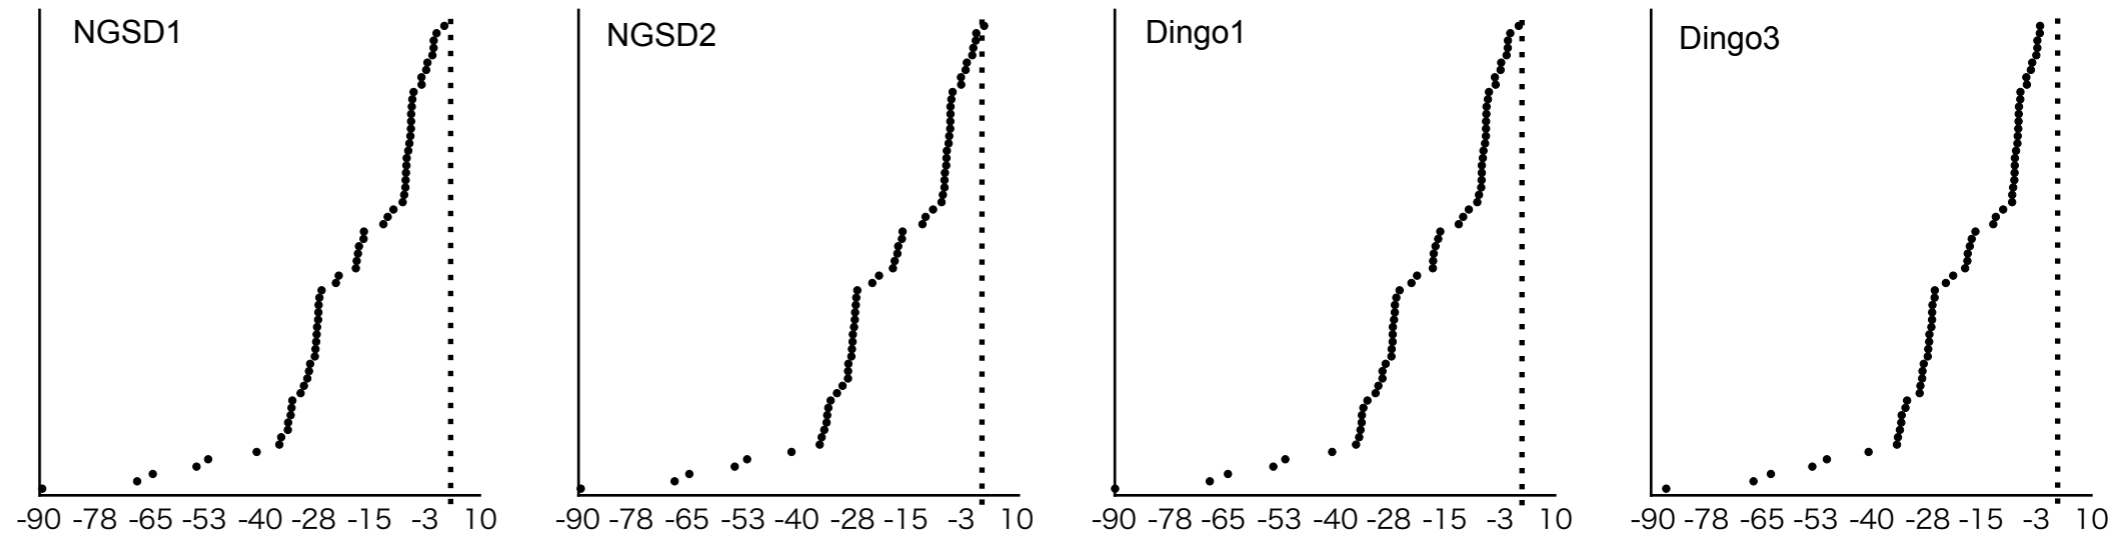

**Z score**

Figure S18

*f4* statistics testing the affinity of NGSD1 with African dogs (upper panels) and that of Basenji with dingo/NGSD dogs (lower panels). All Z scores were under 3.

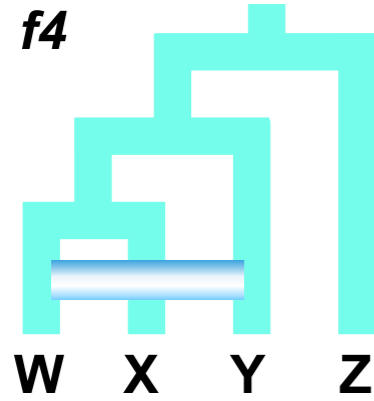

Z: Coyote  
 Y: Dingo/NGSD  
 X: African dogs  
 W: All dogs

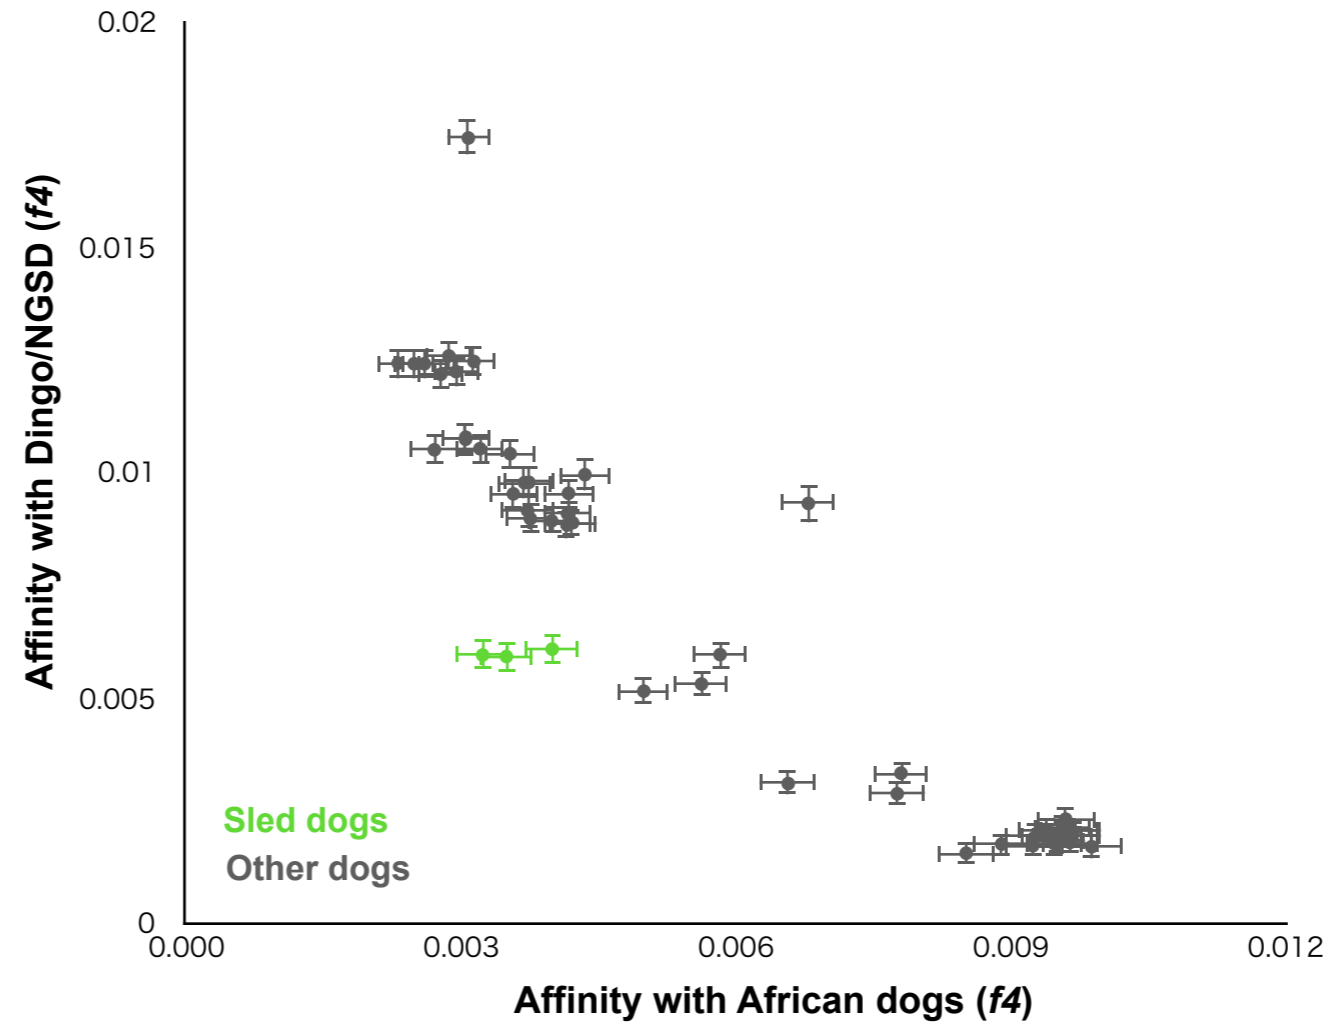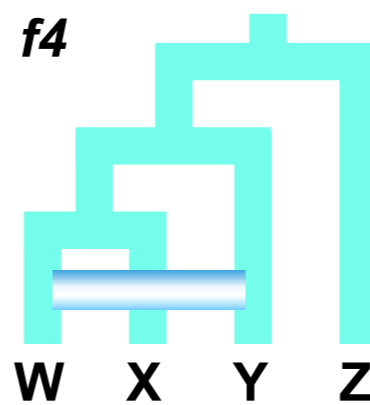

Z: Coyote  
 Y: African dogs  
 X: Dingo/NGSD  
 W: All dogs

Figure S19  
*f4* statistics testing whether dogs share more alleles with African dogs (x-axis) or dingo/NGSD (y-axis) compared with dingo/NGSD and African dogs, respectively. Dots show the *f4* statistics, and horizontal and vertical error bars represent standard errors for the test with the African dogs (x-axis) and dingo/NGSD (y-axis), respectively. Each of the African dogs and dingo/NGSD individuals were used as populations.

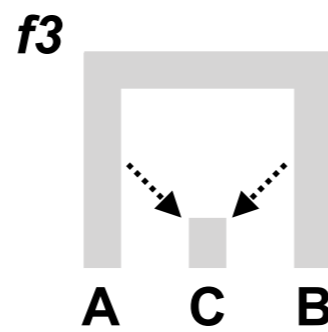

**A: African dogs**  
**B: Dingo/NGSD**  
**C: All dogs**

Figure S20  
*f3* statistics testing the genomic mixture of African and Dingo/NGSD dogs in all dogs. Z score under -3 is colored in blue. Each of the African dogs and Dingo/NGSD individuals were used as populations. Each *f3* value is plotted in order of highest to lowest value from the top, and the names of the dogs are shown on the left side of the panel. Error bars represent standard errors.

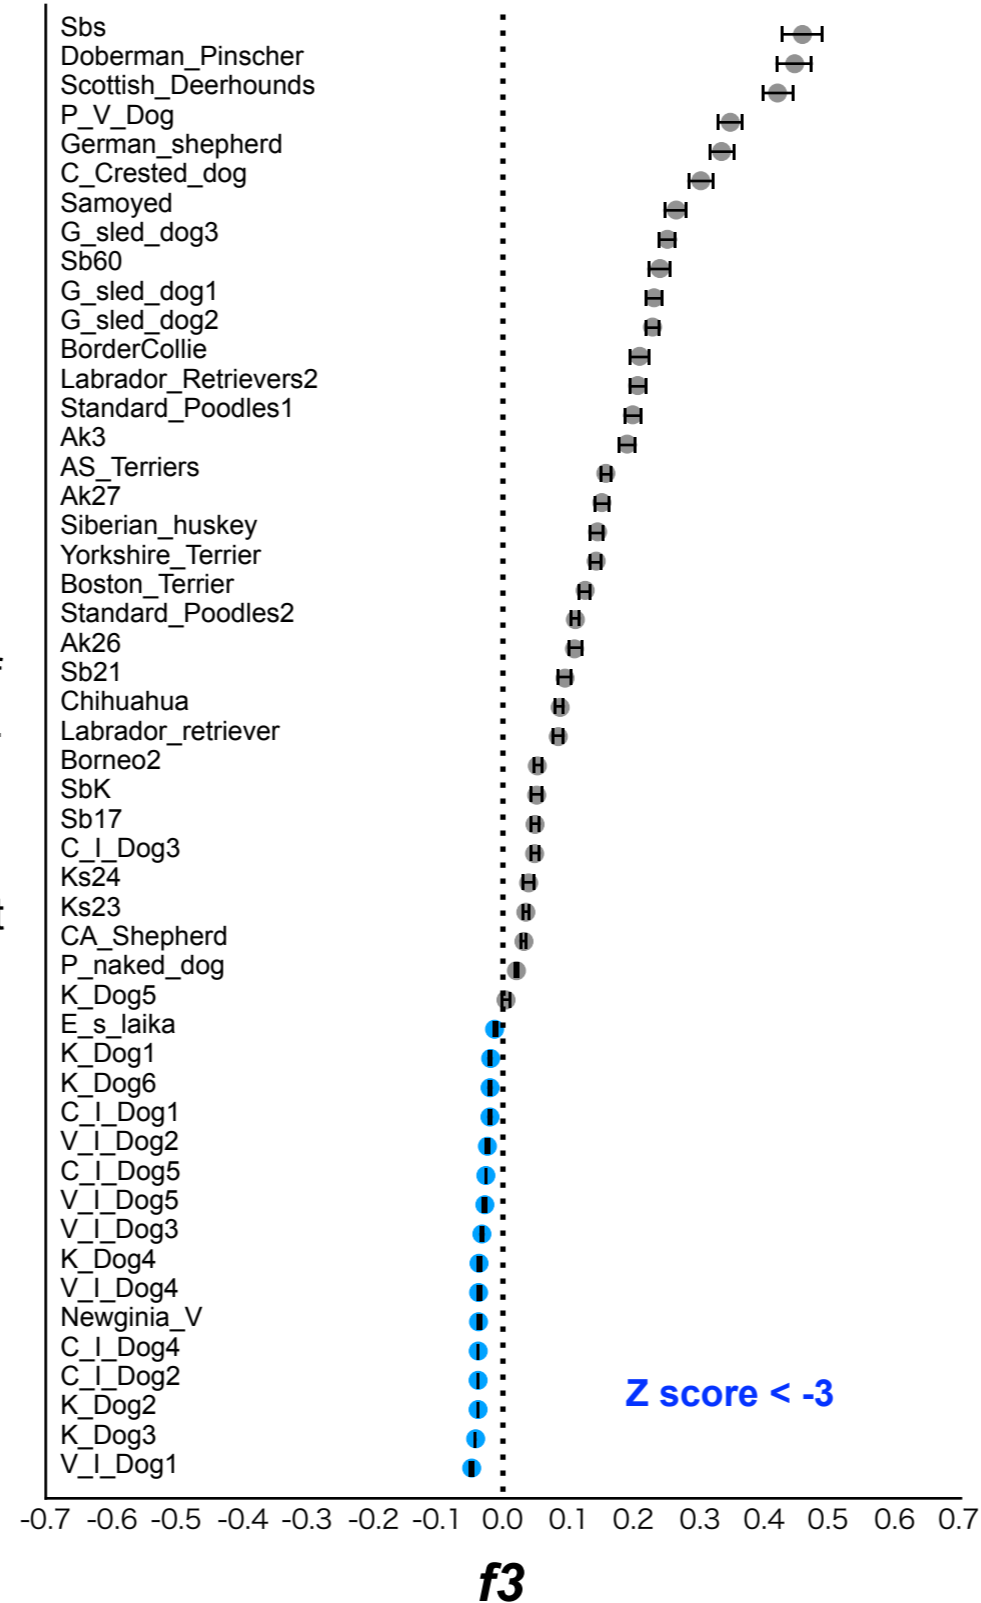



Chromosome 3

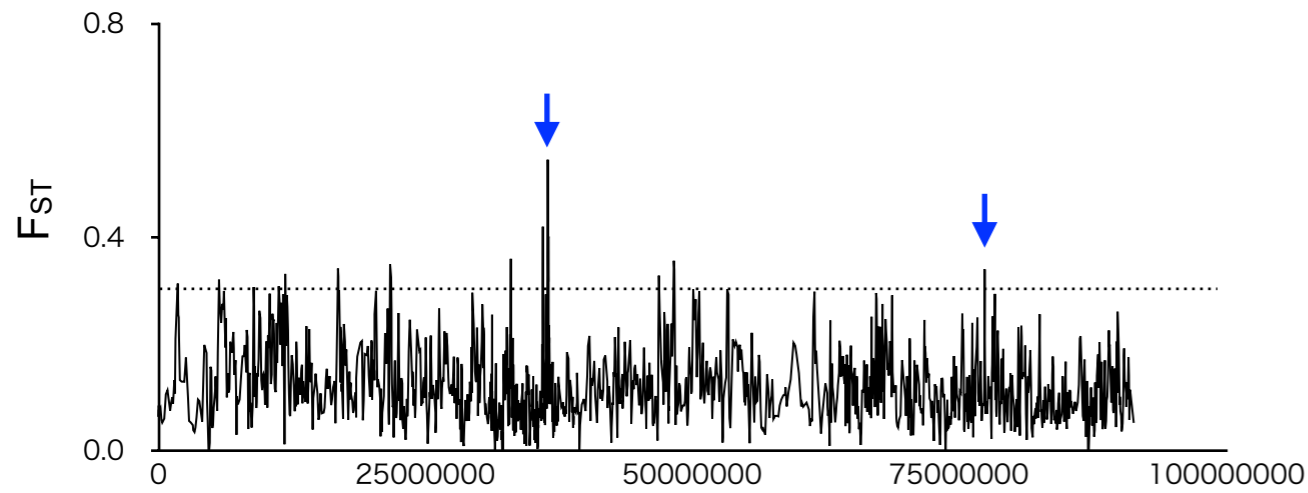

Chromosome 15

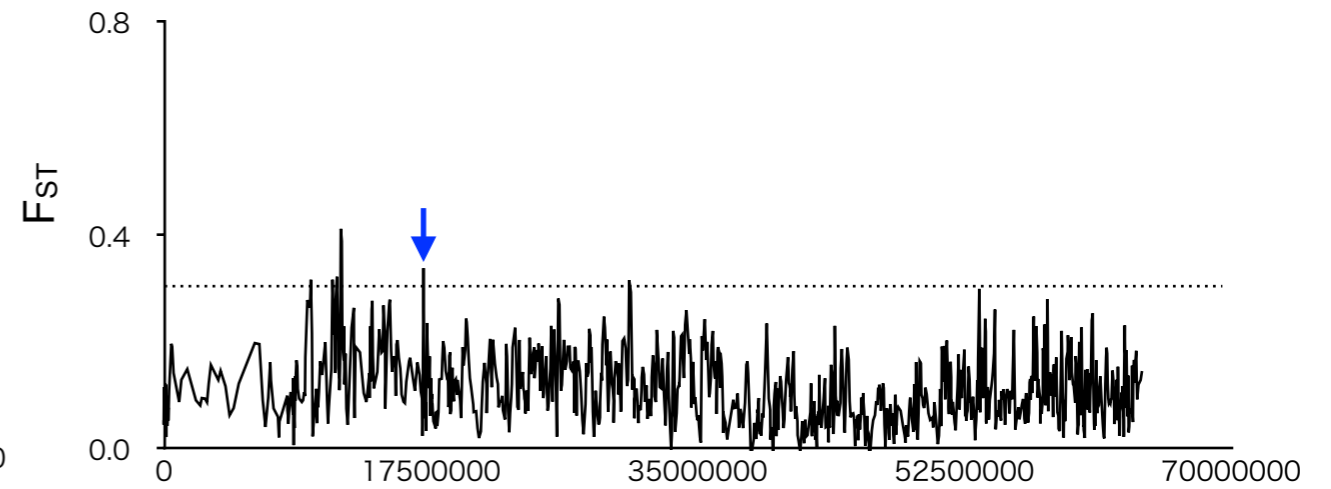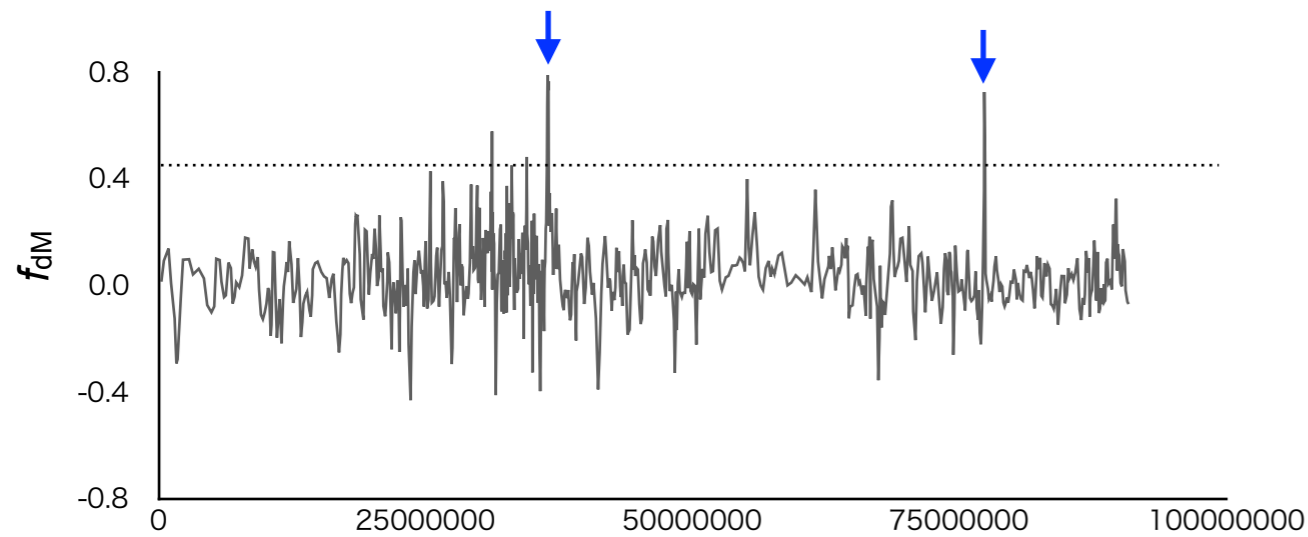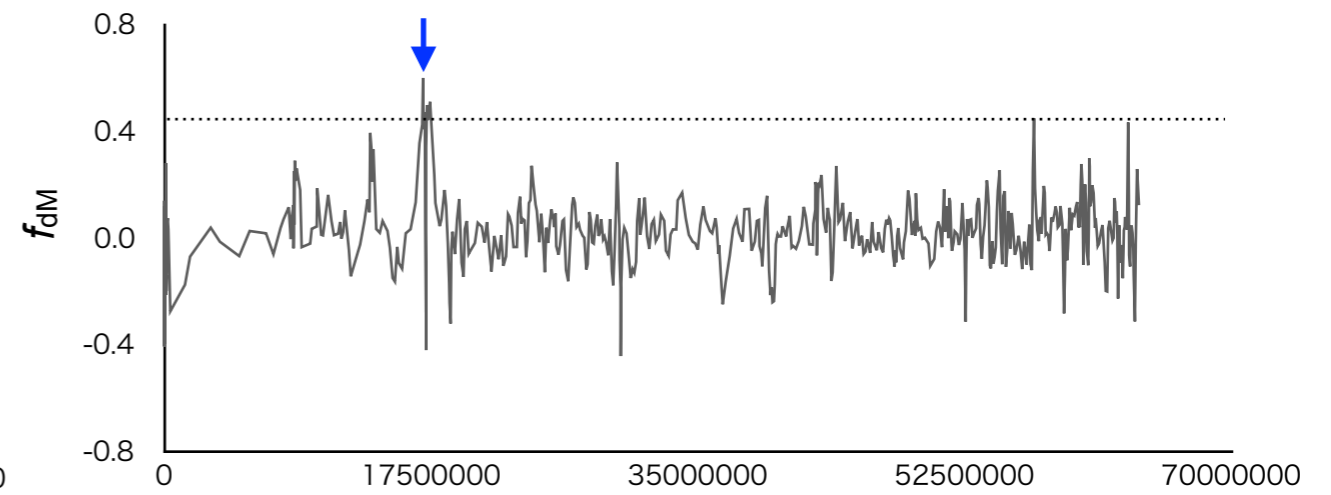

Nucleotide position (bp)

Nucleotide position (bp)

Figure S21  
 Sliding window analyses of the  $F_{ST}$  values (y-axis: upper panel) and  $f_{dM}$  (y-axis: lower panel) in windows of 50 SNPs using a 25 SNPs slide across scaffolds (x-axis). Dashed lines show the 99th percentiles. Blue arrow indicate overlapping regions above 99th percentiles between upper and lower panels.

Chromosome 19

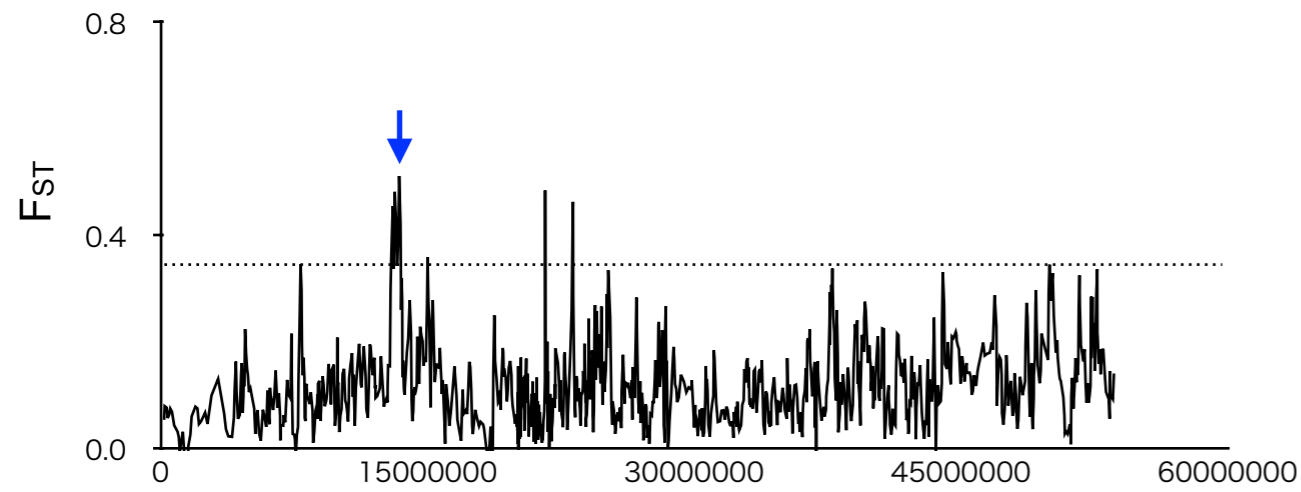

Chromosome 30

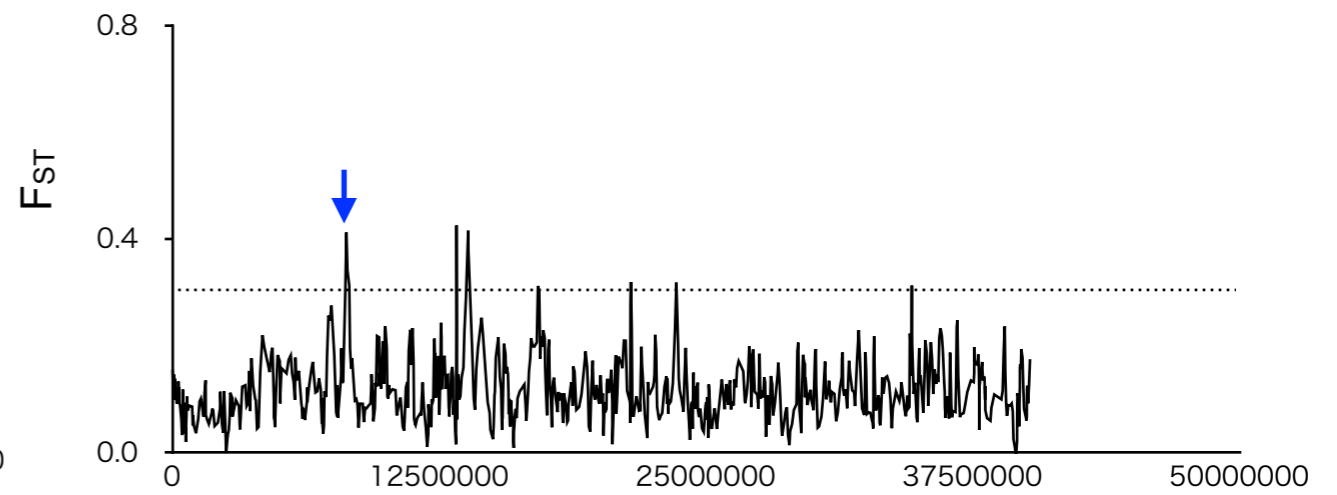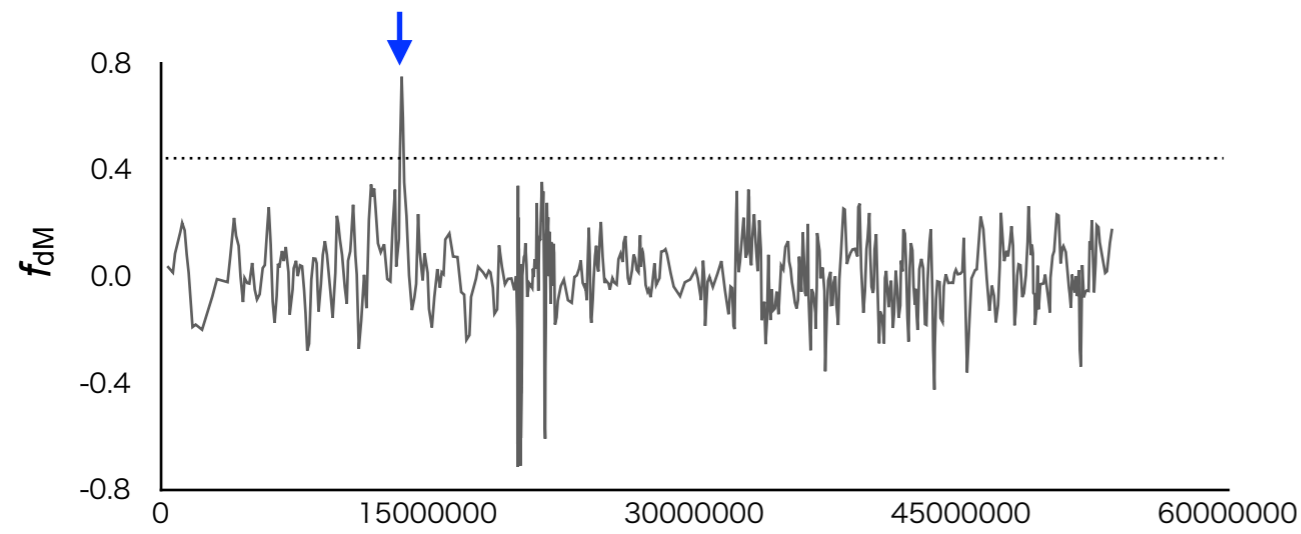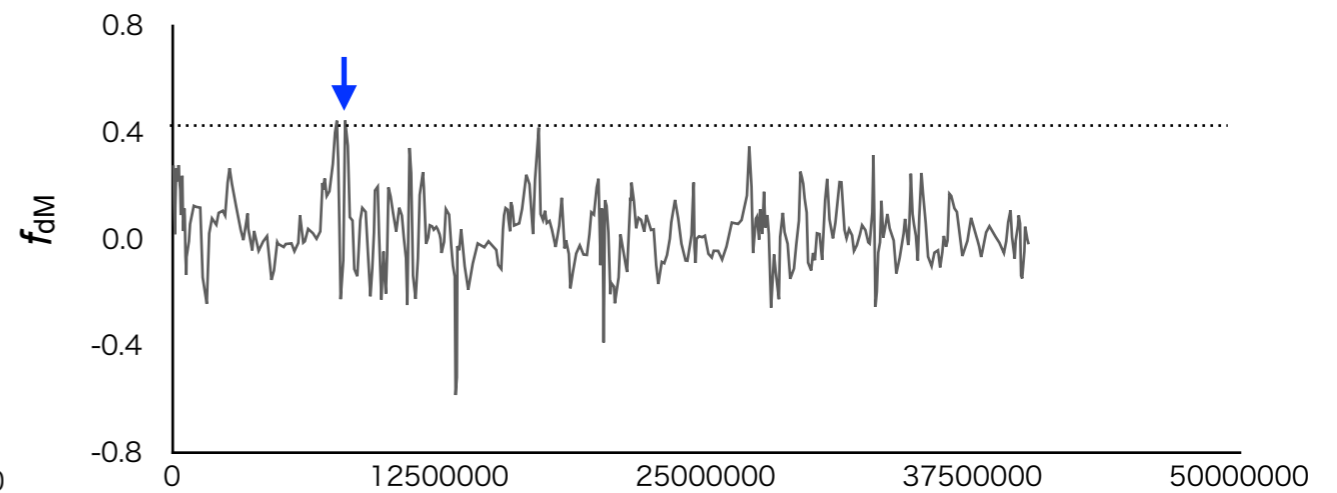

Nucleotide position (bp)

Nucleotide position (bp)

Table S1 Determined sequences in this study

| Wolf/Dog        | ID                                       | Period    | Isolation site (Prefecture) | Mapped reads count | Total mapped reads |
|-----------------|------------------------------------------|-----------|-----------------------------|--------------------|--------------------|
| Japanese Wolves | Leiden_b (Jentink 1887 b RMNH.MAM.39183) | Edo       | Leiden                      | 149 M              | 22.35 Gb           |
| Japanese Wolves | Leiden_c (Jentink 1887 c RMNH.MAM.39181) | Edo       | Leiden                      | 188 M              | 28.2 Gb            |
| Japanese Wolves | Jw255                                    | Edo-Meiji | Yamanashi Pref.             | 1881 M             | 282.2 Gb           |
| Japanese Wolves | Jw271                                    | Edo-Meiji | Iwate Pref.                 | 820 M              | 123 Gb             |
| Japanese Wolves | Jw284 (ZMB_Mam_048817)                   | Meiji     | Berlin                      | 1237 M             | 185.6 Gb           |
| Japanese Wolves | Jw275                                    | Edo-Meiji | Shimane Pref.               | 134 M              | 46.5 Gb            |
| Japanese Wolves | Jw229                                    | Edo       | Kochi Pref.                 | 661 M              | 99.2 Gb            |
| Japanese Wolves | Jw258                                    | Edo-Meiji | Nagano Pref.                | 262 M              | 110 Gb             |
| Japanese Wolves | Jw269                                    | Edo-Meiji | Nagano Pref.                | 193 M              | 61.8 Gb            |
| Dog (Akita)     | Akita26                                  | Modern    | —                           | 847 M              | 127.1 Gb           |
| Dog (Akita)     | Akita27                                  | Modern    | —                           | 808 M              | 121.2 Gb           |
| Dog (Akita)     | Akita3                                   | Modern    | —                           | 772 M              | 115.8 Gb           |
| Dog (Kishu)     | Kishu23                                  | Modern    | —                           | 832 M              | 124.8 Gb           |
| Dog (Kishu)     | Kishu24                                  | Modern    | —                           | 634 M              | 95.1 Gb            |
| Dog (Shiba)     | Shiba17                                  | Modern    | —                           | 632 M              | 94.8 Gb            |
| Dog (Shiba)     | Shiba21                                  | Modern    | —                           | 517 M              | 77.6 Gb            |
| Dog (Shiba)     | Shiba60                                  | Modern    | —                           | 668 M              | 100.2 Gb           |
| Dog (Shiba)     | ShibaKuro                                | Modern    | —                           | 472 M              | 70.8 Gb            |
| Dog (Shiba)     | ShibaShiro                               | Modern    | —                           | 697 M              | 104.6 Gb           |
| Dog (Shiba)     | Jm                                       | Modern    | —                           | 391 M              | 58 Gb              |

Table S2 Sample information

| Accession#    | Sub-species       | Common name                     | IDs in analyses       | PCA & ADMIXTURE (modern) | PCA with Pleistocene canid | PCA & ADMIXTURE with Leiden b, c and Honshu Wolf | Phylogenetic analysis | f4 and f4-ratio with Leiden c | f4 with Leiden b     | f3, f4, and f4-ratio | Fst sliding window   | fdM sliding window   | TreeMix              |
|---------------|-------------------|---------------------------------|-----------------------|--------------------------|----------------------------|--------------------------------------------------|-----------------------|-------------------------------|----------------------|----------------------|----------------------|----------------------|----------------------|
|               |                   |                                 |                       | Without missing data     | Without missing data       | With missing data                                | Without missing data  | Without missing data          | Without missing data | Without missing data | Without missing data | Without missing data | Without missing data |
| Depositing    | Japanese Wolf     | Japanese Wolf                   | Jw255                 | 0                        | 0                          | 0                                                | 0                     |                               |                      | 0                    |                      | 0                    | 0                    |
| Depositing    | Japanese Wolf     | Japanese Wolf                   | Jw271                 | 0                        | 0                          | 0                                                | 0                     |                               |                      | 0                    |                      | 0                    | 0                    |
| Depositing    | Japanese Wolf     | Japanese Wolf                   | Jw284                 | 0                        | 0                          | 0                                                | 0                     | 0                             | 0                    | 0                    |                      | 0                    | 0                    |
| Depositing    | Japanese Wolf     | Japanese Wolf                   | Jw275                 | 0                        | 0                          | 0                                                | 0                     |                               |                      | 0                    |                      | 0                    | 0                    |
| Depositing    | Japanese Wolf     | Japanese Wolf                   | Jw229                 | 0                        | 0                          | 0                                                | 0                     |                               |                      | 0                    |                      | 0                    | 0                    |
| Depositing    | Japanese Wolf     | Japanese Wolf                   | Jw258                 | 0                        | 0                          | 0                                                | 0                     |                               |                      | 0                    |                      | 0                    | 0                    |
| Depositing    | Japanese Wolf     | Japanese Wolf                   | Jw269                 | 0                        | 0                          | 0                                                | 0                     |                               |                      | 0                    |                      | 0                    | 0                    |
| Depositing    | Japanese Wolf     | Japanese Wolf                   | Leiden_b              |                          |                            | 0                                                |                       |                               | 0                    |                      |                      |                      |                      |
| Depositing    | -                 | Jama-inu                        | Leiden_c              |                          |                            | 0                                                |                       | 0                             |                      |                      |                      |                      |                      |
| ERS5374233    | Japanese Wolf     | Honshu Wolf                     |                       |                          |                            | 0                                                |                       |                               |                      |                      |                      |                      |                      |
| Depositing    | Dog               | Kishu                           | Ks23                  | 0                        | 0                          | 0                                                | 0                     | 0                             | 0                    | 0                    | 0                    | 0                    | 0                    |
| Depositing    | Dog               | Kishu                           | Ks24                  | 0                        | 0                          | 0                                                | 0                     | 0                             | 0                    | 0                    | 0                    | 0                    | 0                    |
| Depositing    | Dog               | Akita                           | Ak26                  | 0                        | 0                          | 0                                                | 0                     | 0                             | 0                    | 0                    | 0                    | 0                    | 0                    |
| Depositing    | Dog               | Akita                           | Ak27                  | 0                        | 0                          | 0                                                | 0                     | 0                             | 0                    | 0                    | 0                    | 0                    | 0                    |
| Depositing    | Dog               | Akita                           | Ak3                   | 0                        | 0                          | 0                                                | 0                     | 0                             | 0                    | 0                    | 0                    | 0                    | 0                    |
| Depositing    | Dog               | Shiba                           | Sb17                  | 0                        | 0                          | 0                                                | 0                     | 0                             | 0                    | 0                    | 0                    | 0                    | 0                    |
| Depositing    | Dog               | Shiba                           | Sb21                  | 0                        | 0                          | 0                                                | 0                     | 0                             | 0                    | 0                    | 0                    | 0                    | 0                    |
| Depositing    | Dog               | Shiba                           | Sb60                  | 0                        | 0                          | 0                                                | 0                     | 0                             | 0                    | 0                    | 0                    | 0                    | 0                    |
| Depositing    | Dog               | Shiba                           | SbK                   | 0                        | 0                          | 0                                                | 0                     | 0                             | 0                    | 0                    | 0                    | 0                    | 0                    |
| Depositing    | Dog               | Shiba                           | Sbs                   | 0                        | 0                          | 0                                                | 0                     | 0                             | 0                    | 0                    | 0                    | 0                    | 0                    |
| Depositing    | Dog               | Shiba                           | Jm                    | 0                        | 0                          | 0                                                | 0                     | 0                             | 0                    | 0                    | 0                    | 0                    | 0                    |
| SRR10596312   | Dog               | Dingo                           | dingo1                | 0                        | 0                          | 0                                                | 0                     | 0                             | 0                    | 0                    |                      |                      | 0                    |
| SRR10596315   | Dog               | Dingo                           | dingo2                | 0                        | 0                          | 0                                                | 0                     | 0                             | 0                    | 0                    |                      |                      | 0                    |
| SRR10596318   | Dog               | Dingo                           | dingo3                | 0                        | 0                          | 0                                                | 0                     | 0                             | 0                    | 0                    |                      |                      | 0                    |
| SRR10596321_1 | Dog               | Dingo                           | dingo4                | 0                        | 0                          | 0                                                | 0                     | 0                             | 0                    | 0                    |                      |                      | 0                    |
| SRR10597858   | Dog               | New Guinea Singing Dog          | NGS_dog1              | 0                        | 0                          | 0                                                | 0                     | 0                             | 0                    | 0                    |                      |                      | 0                    |
| SRR10597859   | Dog               | New Guinea Singing Dog          | NGS_dog2              | 0                        | 0                          | 0                                                | 0                     | 0                             | 0                    | 0                    |                      |                      | 0                    |
| SRR2827578_1  | Dog               | Chinese Indigenous Dog          | C_I_Dog1              | 0                        | 0                          | 0                                                | 0                     | 0                             | 0                    | 0                    |                      |                      | 0                    |
| SRR2827583_1  | Dog               | Chinese Indigenous Dog          | C_I_Dog2              | 0                        | 0                          | 0                                                | 0                     | 0                             | 0                    | 0                    |                      |                      | 0                    |
| SRR2827587_1  | Dog               | Chinese Indigenous Dog          | C_I_Dog3              | 0                        | 0                          | 0                                                | 0                     | 0                             | 0                    | 0                    |                      |                      | 0                    |
| SRR2827588_1  | Dog               | Chinese Indigenous Dog          | C_I_Dog4              | 0                        | 0                          | 0                                                | 0                     | 0                             | 0                    | 0                    |                      |                      | 0                    |
| SRR2827589_1  | Dog               | Chinese Indigenous Dog          | C_I_Dog5              | 0                        | 0                          | 0                                                | 0                     | 0                             | 0                    | 0                    |                      |                      | 0                    |
| SRR2827595_1  | Dog               | Vietnamese Indigenous Dog       | V_I_Dog1              | 0                        | 0                          | 0                                                | 0                     | 0                             | 0                    | 0                    |                      |                      | 0                    |
| SRR2827596_1  | Dog               | Vietnamese Indigenous Dog       | V_I_Dog2              | 0                        | 0                          | 0                                                | 0                     | 0                             | 0                    | 0                    |                      |                      | 0                    |
| SRR2827597_1  | Dog               | Vietnamese Indigenous Dog       | V_I_Dog3              | 0                        | 0                          | 0                                                | 0                     | 0                             | 0                    | 0                    |                      |                      | 0                    |
| SRR2827598_1  | Dog               | Vietnamese Indigenous Dog       | V_I_Dog4              | 0                        | 0                          | 0                                                | 0                     | 0                             | 0                    | 0                    |                      |                      | 0                    |
| SRR2827599_1  | Dog               | Vietnamese Indigenous Dog       | V_I_Dog5              | 0                        | 0                          | 0                                                | 0                     | 0                             | 0                    | 0                    |                      |                      | 0                    |
| SRR5177184_1  | Dog               | DongGyeong                      | K_Dog1                | 0                        | 0                          | 0                                                | 0                     | 0                             | 0                    | 0                    |                      |                      | 0                    |
| SRR5177186_1  | Dog               | DongGyeong                      | K_Dog2                | 0                        | 0                          | 0                                                | 0                     | 0                             | 0                    | 0                    |                      |                      | 0                    |
| SRR5177187_1  | Dog               | DongGyeong                      | K_Dog3                | 0                        | 0                          | 0                                                | 0                     | 0                             | 0                    | 0                    |                      |                      | 0                    |
| SRR5177188_1  | Dog               | DongGyeong                      | K_Dog4                | 0                        | 0                          | 0                                                | 0                     | 0                             | 0                    | 0                    |                      |                      | 0                    |
| SRR5177189_1  | Dog               | DongGyeong                      | K_Dog5                | 0                        | 0                          | 0                                                | 0                     | 0                             | 0                    | 0                    |                      |                      | 0                    |
| SRR5177190_1  | Dog               | DongGyeong                      | K_Dog6                | 0                        | 0                          | 0                                                | 0                     | 0                             | 0                    | 0                    |                      |                      | 0                    |
| SRR11193488_1 | Dog               | Greenland sled dog              | G_sled_dog1           | 0                        | 0                          | 0                                                | 0                     | 0                             | 0                    | 0                    |                      |                      | 0                    |
| SRR11193493_1 | Dog               | Greenland sled dog              | G_sled_dog2           | 0                        | 0                          | 0                                                | 0                     | 0                             | 0                    | 0                    |                      |                      | 0                    |
| SRR11193499_1 | Dog               | Greenland sled dog              | G_sled_dog3           | 0                        | 0                          | 0                                                | 0                     | 0                             | 0                    | 0                    |                      |                      | 0                    |
| SRR2827574_1  | Dog               | Siberian husky                  | Siberian_husky        | 0                        | 0                          | 0                                                | 0                     | 0                             | 0                    | 0                    |                      |                      | 0                    |
| SRR2827565_1  | Dog               | East siberian laika             | E_s_laika             | 0                        | 0                          | 0                                                | 0                     | 0                             | 0                    | 0                    |                      |                      | 0                    |
| SRR2827573_1  | Dog               | Samoyed                         | Samoyed               | 0                        | 0                          | 0                                                | 0                     | 0                             | 0                    | 0                    |                      |                      | 0                    |
| SRR5381785_1  | Dog               | Central Asian Shepherd          | CA_Shepherd           | 0                        | 0                          | 0                                                | 0                     | 0                             | 0                    | 0                    |                      |                      | 0                    |
| SRR1594157_1  | Dog               | Chinese Crested dog             | C_Crested_dog         | 0                        | 0                          | 0                                                | 0                     | 0                             | 0                    | 0                    |                      |                      | 0                    |
| SRR2827564_1  | Dog               | Chihuahua                       | Chihuahua             | 0                        | 0                          | 0                                                | 0                     | 0                             | 0                    | 0                    |                      |                      | 0                    |
| SRR2827572_1  | Dog               | Peruvian naked dog              | P_naked_dog           | 0                        | 0                          | 0                                                | 0                     | 0                             | 0                    | 0                    |                      |                      | 0                    |
| SRR3384031_1  | Dog               | Portugal Village Dog            | P_V_Dog               | 0                        | 0                          | 0                                                | 0                     | 0                             | 0                    | 0                    |                      |                      | 0                    |
| SRR3466766_1  | Dog               | BorderCollie                    | BorderCollie          | 0                        | 0                          | 0                                                | 0                     | 0                             | 0                    | 0                    |                      |                      | 0                    |
| SRR6297982_1  | Dog               | Doberman Pinscher               | Doberman Pinscher     | 0                        | 0                          | 0                                                | 0                     | 0                             | 0                    | 0                    |                      |                      | 0                    |
| SRR6376929_1  | Dog               | American Staffordshire Terriers | AS_Terriers           | 0                        | 0                          | 0                                                | 0                     | 0                             | 0                    | 0                    |                      |                      | 0                    |
| SRR7107687    | Dog               | Borneo Village Dog              | Borneo2               | 0                        | 0                          | 0                                                | 0                     | 0                             | 0                    | 0                    |                      |                      | 0                    |
| SRR10208218_1 | Dog               | Boston Terrier                  | Boston Terrier        | 0                        | 0                          | 0                                                | 0                     | 0                             | 0                    | 0                    |                      |                      | 0                    |
| SRR10250959_1 | Dog               | Scottish Deerhounds             | Scottish Deerhounds   | 0                        | 0                          | 0                                                | 0                     | 0                             | 0                    | 0                    |                      |                      | 0                    |
| SRR9117685_1  | Dog               | German shepherd                 | German shepherd       | 0                        | 0                          | 0                                                | 0                     | 0                             | 0                    | 0                    |                      |                      | 0                    |
| SRR11787131_1 | Dog               | Labrador retriever              | Labrador retriever    | 0                        | 0                          | 0                                                | 0                     | 0                             | 0                    | 0                    |                      |                      | 0                    |
| SRR9962250_1  | Dog               | Labrador Retriever              | Labrador_Retrievers2  | 0                        | 0                          | 0                                                | 0                     | 0                             | 0                    | 0                    |                      |                      | 0                    |
| SRR7107697    | Dog               | Newginia Village Dog            | Newginia_V            | 0                        | 0                          | 0                                                | 0                     | 0                             | 0                    | 0                    |                      |                      | 0                    |
| SRR7764562_1  | Dog               | Yorkshire Terrier               | Yorkshire Terrier     | 0                        | 0                          | 0                                                | 0                     | 0                             | 0                    | 0                    |                      |                      | 0                    |
| SRR8163589_1  | Dog               | Standard Poodle                 | Standard_Poodles1     | 0                        | 0                          | 0                                                | 0                     | 0                             | 0                    | 0                    |                      |                      | 0                    |
| SRR8163591_1  | Dog               | Standard Poodle                 | Standard_Poodles2     | 0                        | 0                          | 0                                                | 0                     | 0                             | 0                    | 0                    |                      |                      | 0                    |
| SRR2827591_1  | Dog               | Nigerian Indigenous Dog         | N_I_Dog1              | 0                        | 0                          | 0                                                | 0                     | 0                             | 0                    | 0                    |                      |                      | 0                    |
| SRR2827592_1  | Dog               | Nigerian Indigenous Dog         | N_I_Dog2              | 0                        | 0                          | 0                                                | 0                     | 0                             | 0                    | 0                    |                      |                      | 0                    |
| SRR2827593_1  | Dog               | Nigerian Indigenous Dog         | N_I_Dog3              | 0                        | 0                          | 0                                                | 0                     | 0                             | 0                    | 0                    |                      |                      | 0                    |
| SRR2827594_1  | Dog               | Nigerian Indigenous Dog         | N_I_Dog4              | 0                        | 0                          | 0                                                | 0                     | 0                             | 0                    | 0                    |                      |                      | 0                    |
| SRR2149861_1  | Dog               | Basenji                         | Basenji               | 0                        | 0                          | 0                                                | 0                     | 0                             | 0                    | 0                    |                      |                      | 0                    |
| SRR3603090_1  | Dog               | African dogs                    | AF_Dog1               | 0                        | 0                          | 0                                                | 0                     | 0                             | 0                    | 0                    |                      |                      | 0                    |
| SRR3603171_1  | Dog               | African dogs                    | AF_Dog2               | 0                        | 0                          | 0                                                | 0                     | 0                             | 0                    | 0                    |                      |                      | 0                    |
| SRR3603205_1  | Dog               | African dogs                    | AF_Dog3               | 0                        | 0                          | 0                                                | 0                     | 0                             | 0                    | 0                    |                      |                      | 0                    |
| SRR3603206_1  | Dog               | African dogs                    | AF_Dog4               | 0                        | 0                          | 0                                                | 0                     | 0                             | 0                    | 0                    |                      |                      | 0                    |
| SRR3603236_1  | Dog               | African dogs                    | AF_Dog5               | 0                        | 0                          | 0                                                | 0                     | 0                             | 0                    | 0                    |                      |                      | 0                    |
| SRR2017901_1  | Gray Wolf         | Himalayan Wolf                  | Wolf_chanco1          | 0                        | 0                          | 0                                                | 0                     | 0                             | 0                    | 0                    |                      |                      | 0                    |
| SRR2017902_1  | Gray Wolf         | Himalayan Wolf                  | Wolf_chanco2          | 0                        | 0                          | 0                                                | 0                     | 0                             | 0                    | 0                    |                      |                      | 0                    |
| SRR2017904_1  | Gray Wolf         | Himalayan Wolf                  | Wolf_chanco3          | 0                        | 0                          | 0                                                | 0                     | 0                             | 0                    | 0                    |                      |                      | 0                    |
| SRR1518523_1  | Gray Wolf         | Gray Wolf (Portugal)            | Wolf_Portugal         | 0                        | 0                          | 0                                                | 0                     | 0                             | 0                    | 0                    |                      |                      | 0                    |
| SRR2149870_1  | Gray Wolf         | Israeli Wolf                    | Wolf_Israel           | 0                        | 0                          | 0                                                | 0                     | 0                             | 0                    | 0                    |                      |                      | 0                    |
| SRR2149873_1  | Gray Wolf         | Croatian Wolf                   | Wolf_Croatian         | 0                        | 0                          | 0                                                | 0                     | 0                             | 0                    | 0                    |                      |                      | 0                    |
| SRR2149879_1  | Gray Wolf         | Chinese Wolf                    | Wolf_Chinese1         | 0                        | 0                          | 0                                                | 0                     | 0                             | 0                    | 0                    |                      |                      | 0                    |
| SRR2149880_1  | Gray Wolf         | Chinese Wolf                    | Wolf_Chinese2         | 0                        | 0                          | 0                                                | 0                     | 0                             | 0                    | 0                    |                      |                      | 0                    |
| SRR3384029_1  | Gray Wolf         | Iberian Wolf                    | Wolf_Iberia1          | 0                        | 0                          | 0                                                | 0                     | 0                             | 0                    | 0                    |                      |                      | 0                    |
| SRR3384030_1  | Gray Wolf         | Iberian Wolf                    | Wolf_Iberia2          | 0                        | 0                          | 0                                                | 0                     | 0                             | 0                    | 0                    |                      |                      | 0                    |
| SRR3574809    | Gray Wolf         | Indian Wolf                     | Wolf_India            | 0                        | 0                          | 0                                                | 0                     | 0                             | 0                    | 0                    |                      |                      | 0                    |
| SRR8049193_1  | Gray Wolf         | Grey Wolf (Saudi Arabia)        | Wolf_Saudi_Arabia     | 0                        | 0                          | 0                                                | 0                     | 0                             | 0                    | 0                    |                      |                      | 0                    |
| SRR8049194_1  | Gray Wolf         | Grey Wolf (Syria)               | Wolf_Syria            | 0                        | 0                          | 0                                                | 0                     | 0                             | 0                    | 0                    |                      |                      | 0                    |
| SRR8049195_1  | Gray Wolf         | Grey Wolf (Daneborg)            | Wolf_Daneborg         | 0                        | 0                          | 0                                                | 0                     | 0                             | 0                    | 0                    |                      |                      | 0                    |
| SRR8066603_1  | Gray Wolf         | Grey Wolf (StLawrencelsland)    | Wolf_StLawrencelsland | 0                        | 0                          | 0                                                | 0                     | 0                             | 0                    | 0                    |                      |                      | 0                    |
| SRR8066604_1  | Gray Wolf         | Grey Wolf (PacificCoast)        | Wolf_PacificCoast     | 0                        | 0                          | 0                                                | 0                     | 0                             | 0                    | 0                    |                      |                      | 0                    |
| SRR8066607_1  | Gray Wolf         | Grey Wolf (BaffinNorth)         | Wolf_BaffinNorth      | 0                        | 0                          | 0                                                | 0                     | 0                             | 0                    | 0                    |                      |                      | 0                    |
| SRR8066615_1  | Gray Wolf         | Grey Wolf (BanksIsland)         | Wolf_BanksIsland      | 0                        | 0                          | 0                                                | 0                     | 0                             | 0                    | 0                    |                      |                      | 0                    |
| SRR8380700_1  | Gray Wolf         | Grey Wolf (Michigan)            | Wolf_Michigan         | 0                        | 0                          | 0                                                | 0                     | 0                             | 0                    | 0                    |                      |                      | 0                    |
| SRR8380701_1  | Gray Wolf         | Grey Wolf (Minnesota)           | Wolf_Minnesota        | 0                        | 0                          | 0                                                | 0                     | 0                             | 0                    | 0                    |                      |                      | 0                    |
| SRR8380706_1  | Gray Wolf         | Grey Wolf (Canada)              | Wolf_Canad1           | 0                        | 0                          | 0                                                | 0                     | 0                             | 0                    | 0                    |                      |                      | 0                    |
| SRR8380708_1  | Gray Wolf         | Grey Wolf (Canada)              | Wolf_Canad2           | 0                        | 0                          | 0                                                | 0                     | 0                             | 0                    | 0                    |                      |                      | 0                    |
| SRR9095639_1  | Gray Wolf         | Grey Wolf (Yellowstone)         | Wolf_Yellowstone      | 0                        | 0                          | 0                                                | 0                     | 0                             | 0                    | 0                    |                      |                      | 0                    |
| SRR3417116    | Ancient dog       | Ancient dog                     | Cherry Tree Cave Dog  |                          |                            | 0                                                |                       |                               |                      |                      |                      |                      |                      |
| SRR3417117    | Ancient dog       | Ancient dog                     | Hexheim Dog           |                          |                            | 0                                                |                       |                               |                      |                      |                      |                      |                      |
| SRR11193507   | Ancient dog       | Ancient dog                     | Zhokhov Dog           |                          |                            | 0                                                |                       |                               |                      |                      |                      |                      |                      |
| ERR1341514    | Ancient dog       | Ancient dog                     | Newgrange Dog         |                          |                            | 0                                                |                       |                               |                      |                      |                      |                      |                      |
| ERR4805960    | Pleistocene canid | Pleistocene canid               | Bunge-Toll-1885       |                          |                            | 0                                                |                       |                               |                      |                      |                      |                      |                      |
| ERR4805984    | Pleistocene canid | Pleistocene canid               | Tirekhtyakh           |                          |                            | 0                                                |                       |                               |                      |                      |                      |                      |                      |
| ERR4805988    | Pleistocene canid | Pleistocene canid               | Tumat 2               |                          |                            | 0                                                |                       |                               |                      |                      |                      |                      |                      |
| ERR4805972    | Pleistocene canid | Pleistocene canid               | Ulakhan Sular         |                          |                            | 0                                                |                       |                               |                      |                      |                      |                      |                      |
| SRR11193495   | Pleistocene canid | Pleistocene canid               | Yana RHS              |                          |                            | 0                                                |                       |                               |                      |                      |                      |                      |                      |
| SRR7107770    | out group         | Coyote                          | Coyote                | 0                        | 0                          | 0                                                | 0                     | 0                             | 0                    | 0                    |                      | 0                    | 0                    |
| SRR8049189    | out group         | Dhole                           | Dhole                 |                          |                            | 0                                                |                       |                               |                      |                      |                      |                      |                      |
| SRR8049190    | out group         | Ethiopian wolf                  | Ethi_W                |                          |                            | 0                                                |                       |                               |                      |                      |                      |                      |                      |
| SRR8049192    | out group         | Golden Jackal (Syria)           | G_Jackal_Syria        | 0                        | 0                          | 0                                                | 0                     | 0                             | 0                    | 0                    |                      |                      | 0                    |
| PRJCA000335   | out group         | African Golden Wolf             | AGW                   | 0                        | 0                          | 0                                                | 0                     | 0                             | 0                    | 0                    |                      |                      | 0                    |
| SRR1066702    | out group         | Andean fox                      | ad_fox                |                          |                            | 0                                                |                       |                               |                      |                      |                      |                      | 0                    |

bioRxiv preprint doi: <https://doi.org/10.1101/2021.10.10.462714>; this version posted October 11, 2021. The copyright holder for this preprint (which was not certified by peer review) is the author/funder, who has granted bioRxiv a license to display the preprint in perpetuity. It is made available under aCC-BY-ND 4.0 International license.

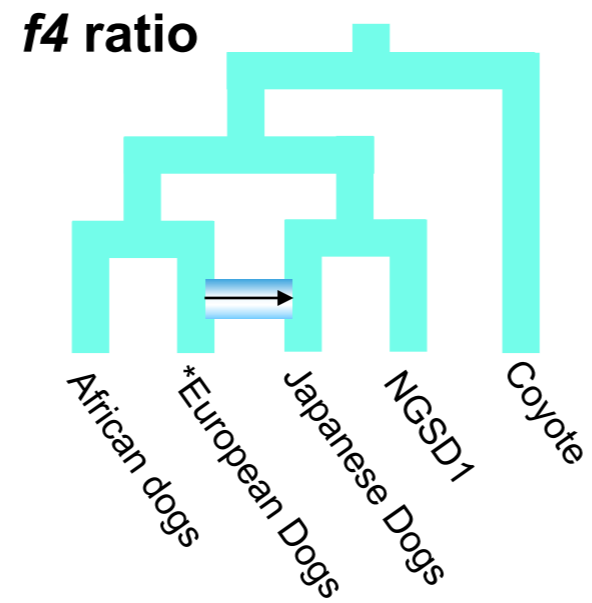

**Table S3 The degree of mixing of the European dog genome into the Japanese dog genome**

| Japanese Dogs | <i>f4</i> -ratio (alpha) | Standard error | Z score |
|---------------|--------------------------|----------------|---------|
| Akita         | <b>0.363</b>             | 0.019328       | 18.768  |
| Ks            | <b>0.366</b>             | 0.020174       | 18.133  |
| Shiba         | <b>0.445</b>             | 0.017633       | 25.237  |

\*European Dogs: Yorkshire\_Terrier, P\_V\_Dog, Standard\_Poodles1, Standard\_Poodles2, Scottish\_Deerhounds, BorderCollie, Boston\_Terrier, Doberman\_Pinscher, AS\_Terriers, German\_shepherd.  
See Table S2 for the name of the dogs.

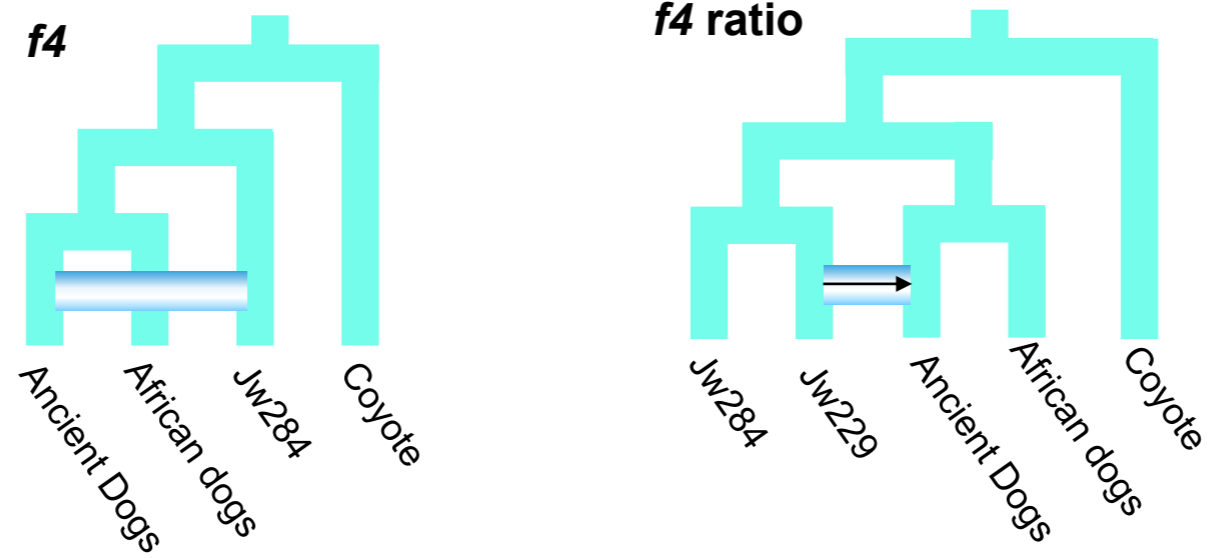

Table S4 Gene flow between Japanese Wolf and ancient dogs

| Ancient Dogs     | Years ago | <i>f4</i> | stderr   | Zscore       | <i>f4</i> -ratio(alpha) | stderr   | Zscore       |
|------------------|-----------|-----------|----------|--------------|-------------------------|----------|--------------|
| Newgrange        | 4800      | 0.003171  | 0.000614 | <b>5.163</b> | 0.015764                | 0.00305  | <b>5.168</b> |
| Cherry Tree Cave | 5000      | 0.001028  | 0.000568 | 1.81         | 0.005231                | 0.002874 | 1.82         |
| Herxheim         | 7000      | 0.003199  | 0.000606 | <b>5.278</b> | 0.016101                | 0.003041 | <b>5.295</b> |
| Zhokhov          | 9500      | 0.004214  | 0.000715 | <b>5.897</b> | 0.021478                | 0.003612 | <b>5.947</b> |

Table S5 Genomic regions differentiated from Western Eurasian dogs and derived from Japanese Wolf

| Chromosome | 5' end   | 3' end   | Genes in the region                     |
|------------|----------|----------|-----------------------------------------|
| 2          | 6257975  | 6307631  | *Ankyrin repeat domain 26 (ANKRD26)     |
| 3          | 36520617 | 36555078 | Upstream of MKRN3, Downstream of CHRNA7 |
| 3          | 77467500 | 77472016 | -                                       |
| 15         | 17047771 | 17058407 | Upstream of FAM183A                     |
| 19         | 13299716 | 13485166 | **Upstream of INTU                      |
| 30         | 8023335  | 8222693  | INO80, ***DLL4, VPS18                   |

\*Mice mutant in one of these genes, ANKRD26, become hyperphagia and also have enhanced adipocyte differentiation (Bera, et al. 2008; Fei, et al. 2011). The traits resulting from the mutation of this gene may have been advantageous to the diet in the Japanese archipelago during Japanese dog evolution.

\*\*INTU is part of a protein network called CPLANE, and mutations in INTU cause a number of skeletal morphological abnormalities, one of which is a flat nasal bridge (Toriyama, et al. 2016). Japanese wolves and Japanese dogs of the Jomon period (still found in a small number of Japanese dogs today) are known to have shallow stops, and perhaps mutations in this gene are related to the formation of shallow stops.

\*\*\*Notch signaling plays an important role in the development and differentiation of many cell types in diverse organisms, and DLL4, the ligand for the Notch receptor, is known to have many roles during development (Benedito and Duarte 2005). Although this gene is multifunctional and therefore traits could not be identified, it may be involved in shaping the characteristics of Japanese dogs through the Notch signaling pathway.

#### Reference

- Benedito R, Duarte A. 2005. Expression of Dll4 during mouse embryogenesis suggests multiple developmental roles. *Gene expression patterns* 5:750-755.
- Bera TK, Liu X-F, Yamada M, Gavrilova O, Mezey E, Tessarollo L, Anver M, Hahn Y, Lee B, Pastan I. 2008. A model for obesity and gigantism due to disruption of the Ankrd26 gene. *Proceedings of the National Academy of Sciences* 105:270-275.
- Fei Z, Bera TK, Liu X, Xiang L, Pastan I. 2011. Ankrd26 gene disruption enhances adipogenesis of mouse embryonic fibroblasts. *Journal of Biological Chemistry* 286:27761-27768.
- Toriyama M, Lee C, Taylor SP, Duran I, Cohn DH, Bruel A-L, Tabler JM, Drew K, Kelly MR, Kim S. 2016. The ciliopathy-associated CPLANE proteins direct basal body recruitment of intraflagellar transport machinery. *Nature genetics* 48:648-656.

Table S6 Mapping rate (%) of reads with Japanese Wolf specific substitutions in the mitochondria DNA

| Position in CanFam3.1 | 2730  | 3346  | 4400 | 4766  | 5828  | 6461  | 7732  | 8473  | 9514  | 10464 | 10701 | 11461 | 12062 | 15225 | 15490 | Mean (%) | Estimated maximum contamination (%) |
|-----------------------|-------|-------|------|-------|-------|-------|-------|-------|-------|-------|-------|-------|-------|-------|-------|----------|-------------------------------------|
| <b>Jw258</b>          | 97.0  | 97.0  | 94.9 | 96.3  | 99.8  | 100.0 | 100.0 | 99.8  | 100.0 | 100.0 | 100.0 | 100.0 | 96.4  | 99.8  | 100.0 | 98.7     | 1.3                                 |
| <b>Jw269</b>          | 70.3  | 80.3  | 75.0 | 76.7  | 86.7  | 100.0 | 97.9  | 83.8  | 84.2  | 89.3  | 91.0  | 84.9  | 81.8  | 86.0  | 75.0  | 84.2     | 15.8                                |
| <b>Jw229</b>          | 92.5  | 93.9  | 94.8 | 94.4  | 97.2  | 99.7  | 97.0  | 96.3  | 95.9  | 97.8  | 97.6  | 97.0  | 90.9  | 95.2  | 95.8  | 95.7     | 4.3                                 |
| <b>Jw255</b>          | 95.3  | 95.9  | 95.3 | 95.4  | 97.9  | 99.9  | 98.8  | 98.3  | 97.8  | 98.1  | 98.1  | 98.5  | 96.8  | 98.0  | 97.9  | 97.5     | 2.5                                 |
| <b>Jw284</b>          | 99.6  | 99.6  | 99.7 | 99.7  | 99.9  | 99.8  | 99.8  | 99.8  | 99.7  | 99.8  | 99.9  | 99.9  | 99.7  | 99.8  | 99.7  | 99.8     | 0.2                                 |
| <b>Jw271</b>          | 98.5  | 98.7  | 98.5 | 98.6  | 99.2  | 99.9  | 99.4  | 99.2  | 99.1  | 99.0  | 99.2  | 99.1  | 98.9  | 99.5  | 98.3  | 99.0     | 1.0                                 |
| <b>Jw275</b>          | 98.6  | 98.4  | 98.1 | 98.0  | 99.3  | 100.0 | 99.5  | 99.5  | 99.0  | 99.0  | 98.6  | 98.6  | 97.7  | 99.0  | 99.0  | 98.8     | 1.2                                 |
| <b>Leiden_c</b>       | 100.0 | 98.8  | 95.6 | 100.0 | 99.2  | 100.0 | 99.3  | 100.0 | 99.2  | 99.0  | 100.0 | 100.0 | 98.9  | 100.0 | 100.0 | 99.3     | 0.7                                 |
| <b>Leiden_b</b>       | 100.0 | 100.0 | 99.9 | 100.0 | 100.0 | 100.0 | 100.0 | 100.0 | 100.0 | 99.9  | 95.7  | 100.0 | 94.5  | 98.8  | 100.0 | 99.3     | 0.7                                 |
